# Supplementary material for: Targeted solid phase fermentation of the soil dwelling fungus Gymnascella dankaliensis yields new brominated tyrosine-derived alkaloids
Source: Royal Society of Chemistry journal article supplement (doi:10.1039/c6ra14554j), 2016-01-01
Supplement: c6ra14554j1.pdf [file c6ra14554j1.pdf]

## Supplementary information

### Targeted solid phase fermentation of the soil dwelling fungus *Gymnascella dankaliensis* yields new brominated tyrosine-derived alkaloids

Hao Wang,<sup>a</sup> Haofu Dai,<sup>b</sup> Christian Heering,<sup>c</sup> Christoph Janiak,<sup>c</sup> Wenhan Lin,<sup>d</sup> Raha S. Orfali,<sup>e</sup> Werner E.G. Müller,<sup>f</sup> Zhen Liu<sup>\*a</sup> and Peter Proksch<sup>\*a</sup>

#### Contents

|                                                                                                                           |    |
|---------------------------------------------------------------------------------------------------------------------------|----|
| Figure S1. HRESIMS of compound <b>1</b> .....                                                                             | 4  |
| Figure S2. <sup>1</sup> H NMR (600MHz, DMSO- <i>d</i> <sub>6</sub> ) spectrum of compound <b>1</b> .....                  | 5  |
| Figure S3. <sup>13</sup> C NMR (150MHz, DMSO- <i>d</i> <sub>6</sub> ) spectrum of compound <b>1</b> .....                 | 6  |
| Figure S4. <sup>1</sup> H- <sup>1</sup> H COSY (600MHz, DMSO- <i>d</i> <sub>6</sub> ) spectrum of compound <b>1</b> ..... | 7  |
| Figure S5. HSQC (600MHz, 150MHz, DMSO- <i>d</i> <sub>6</sub> ) spectrum of compound <b>1</b> .....                        | 8  |
| Figure S6. HMBC (600MHz, 150MHz, DMSO- <i>d</i> <sub>6</sub> ) spectrum of compound <b>1</b> .....                        | 9  |
| Figure S7. ROESY (600MHz, DMSO- <i>d</i> <sub>6</sub> ) spectrum of compound <b>1</b> .....                               | 10 |
| Figure S8. <sup>1</sup> H NMR (600MHz, methanol- <i>d</i> <sub>4</sub> ) spectrum of compound <b>1</b> .....              | 11 |

|                                                                                                             |    |
|-------------------------------------------------------------------------------------------------------------|----|
| Figure S9. $^{13}\text{C}$ NMR (150MHz, methanol- $d_4$ ) spectrum of compound <b>1</b> .....               | 12 |
| Figure S10. $^1\text{H}$ - $^1\text{H}$ COSY (600MHz, methanol- $d_4$ ) spectrum of compound <b>1</b> ..... | 13 |
| Figure S11. HSQC (600MHz, 150MHz, methanol- $d_4$ ) spectrum of compound <b>1</b> .....                     | 14 |
| Figure S12. HMBC (600MHz, 150MHz, methanol- $d_4$ ) spectrum of compound <b>1</b> .....                     | 15 |
| Figure S13. ROESY (600MHz, methanol- $d_4$ ) spectrum of compound <b>1</b> .....                            | 16 |
| Figure S14. HRESIMS of compound <b>2</b> .....                                                              | 17 |
| Figure S15. $^1\text{H}$ NMR (600MHz, methanol- $d_4$ ) spectrum of compound <b>2</b> .....                 | 18 |
| Figure S16. $^{13}\text{C}$ NMR (150MHz, methanol- $d_4$ ) spectrum of compound <b>2</b> .....              | 19 |
| Figure S17. $^1\text{H}$ - $^1\text{H}$ COSY (600MHz, methanol- $d_4$ ) spectrum of compound <b>2</b> ..... | 20 |
| Figure S18. HSQC (600MHz, 150MHz, methanol- $d_4$ ) spectrum of compound <b>2</b> .....                     | 21 |
| Figure S19. HMBC (600MHz, 150MHz, methanol- $d_4$ ) spectrum of compound <b>2</b> .....                     | 22 |
| Figure S20. ROESY (600MHz, methanol- $d_4$ ) spectrum of compound <b>2</b> .....                            | 23 |
| Figure S21. HRESIMS of compound <b>3</b> .....                                                              | 24 |
| Figure S22. $^1\text{H}$ NMR (600MHz, $\text{CDCl}_3$ ) spectrum of compound <b>3</b> .....                 | 25 |
| Figure S23. $^{13}\text{C}$ NMR (150MHz, $\text{CDCl}_3$ ) spectrum of compound <b>3</b> .....              | 26 |
| Figure S24. $^1\text{H}$ - $^1\text{H}$ COSY (600MHz, $\text{CDCl}_3$ ) spectrum of compound <b>3</b> ..... | 27 |
| Figure S25. HSQC (600MHz, 150MHz, $\text{CDCl}_3$ ) spectrum of compound <b>3</b> .....                     | 28 |
| Figure S26. HMBC (600MHz, 150MHz, $\text{CDCl}_3$ ) spectrum of compound <b>3</b> .....                     | 29 |
| Figure S27. ROESY (600MHz, $\text{CDCl}_3$ ) spectrum of compound <b>3</b> .....                            | 30 |
| Figure S28. HRESIMS of compound <b>4</b> .....                                                              | 31 |
| Figure S29. $^1\text{H}$ NMR (600MHz, $\text{CDCl}_3$ ) spectrum of compound <b>4</b> .....                 | 32 |
| Figure S30. $^{13}\text{C}$ NMR (150MHz, $\text{CDCl}_3$ ) spectrum of compound <b>4</b> .....              | 33 |
| Figure S31. $^1\text{H}$ - $^1\text{H}$ COSY (600MHz, $\text{CDCl}_3$ ) spectrum of compound <b>4</b> ..... | 34 |
| Figure S32. HSQC (600MHz, 150MHz, $\text{CDCl}_3$ ) spectrum of compound <b>4</b> .....                     | 35 |
| Figure S33. HMBC (600MHz, 150MHz, $\text{CDCl}_3$ ) spectrum of compound <b>4</b> .....                     | 36 |
| Figure S34. ROESY (600MHz, $\text{CDCl}_3$ ) spectrum of compound <b>4</b> .....                            | 37 |

|                                                                                                                                |    |
|--------------------------------------------------------------------------------------------------------------------------------|----|
| Figure S35. HRESIMS of compound <b>5</b> .....                                                                                 | 38 |
| Figure S36. <sup>1</sup> H NMR (600MHz, methanol- <i>d</i> <sub>4</sub> ) spectrum of compound <b>5</b> .....                  | 39 |
| Figure S37. <sup>1</sup> H- <sup>1</sup> H COSY (300MHz, methanol- <i>d</i> <sub>4</sub> ) spectrum of compound <b>5</b> ..... | 40 |
| Figure S38. HSQC (600MHz, 150MHz, methanol- <i>d</i> <sub>4</sub> ) spectrum of compound <b>5</b> .....                        | 41 |
| Figure S39. HMBC (600MHz, 150MHz, methanol- <i>d</i> <sub>4</sub> ) spectrum of compound <b>5</b> .....                        | 42 |
| Figure S40. ROESY (600MHz, methanol- <i>d</i> <sub>4</sub> ) spectrum of compound <b>5</b> .....                               | 43 |
| Figure S41. HRESIMS of compound <b>6</b> .....                                                                                 | 44 |
| Figure S42. <sup>1</sup> H NMR (600MHz, methanol- <i>d</i> <sub>4</sub> ) spectrum of compound <b>6</b> .....                  | 45 |
| Figure S43. <sup>1</sup> H- <sup>1</sup> H COSY (600MHz, methanol- <i>d</i> <sub>4</sub> ) spectrum of compound <b>6</b> ..... | 46 |
| Figure S44. HSQC (600MHz, 150MHz, methanol- <i>d</i> <sub>4</sub> ) spectrum of compound <b>6</b> .....                        | 47 |
| Figure S45. HMBC (600MHz, 150MHz, methanol- <i>d</i> <sub>4</sub> ) spectrum of compound <b>6</b> .....                        | 48 |
| Figure S46. ROESY (600MHz, methanol- <i>d</i> <sub>4</sub> ) spectrum of compound <b>6</b> .....                               | 49 |
| Figure S47. HRESIMS of compound <b>7</b> .....                                                                                 | 50 |
| Figure S48. <sup>1</sup> H NMR (600MHz, CDCl <sub>3</sub> ) spectrum of compound <b>7</b> .....                                | 51 |
| Figure S49. <sup>1</sup> H- <sup>1</sup> H COSY (600MHz, CDCl <sub>3</sub> ) spectrum of compound <b>7</b> .....               | 52 |
| Figure S50. HSQC (600MHz, 150MHz, CDCl <sub>3</sub> ) spectrum of compound <b>7</b> .....                                      | 53 |
| Figure S51. HMBC (600MHz, 150MHz, CDCl <sub>3</sub> ) spectrum of compound <b>7</b> .....                                      | 54 |
| Figure S52. ROESY (600MHz, CDCl <sub>3</sub> ) spectrum of compound <b>7</b> .....                                             | 55 |
| X-ray crystallographic parameters of compound <b>1</b> (CCDC 1481781).....                                                     | 56 |

# Mass Spectrum SmartFormula Report

## Analysis Info

Analysis Name D:\Data\Spektren 2015\Proksch15HR000324.d  
Method tune\_low.m  
Sample Name Hao Br-5-30-2 (CH3OH)  
Comment 1 ug/ml

Acquisition Date 9/21/2015 1:39:25 PM

Operator Peter Tommes  
Instrument maXis 288882.20213

## Acquisition Parameter

|             |            |                       |           |                  |           |
|-------------|------------|-----------------------|-----------|------------------|-----------|
| Source Type | ESI        | Ion Polarity          | Positive  | Set Nebulizer    | 0.3 Bar   |
| Focus       | Not active | Set Capillary         | 4000 V    | Set Dry Heater   | 180 °C    |
| Scan Begin  | 50 m/z     | Set End Plate Offset  | -500 V    | Set Dry Gas      | 4.0 l/min |
| Scan End    | 1500 m/z   | Set Collision Cell RF | 600.0 Vpp | Set Divert Valve | Source    |

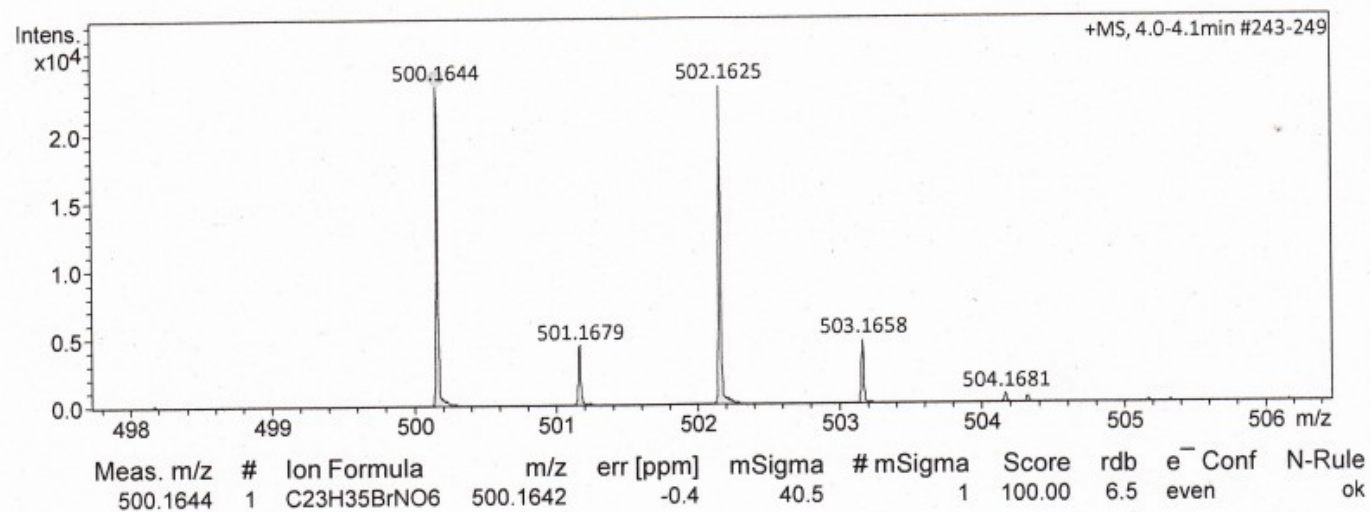

Figure S1. HRESIMS of compound 1.

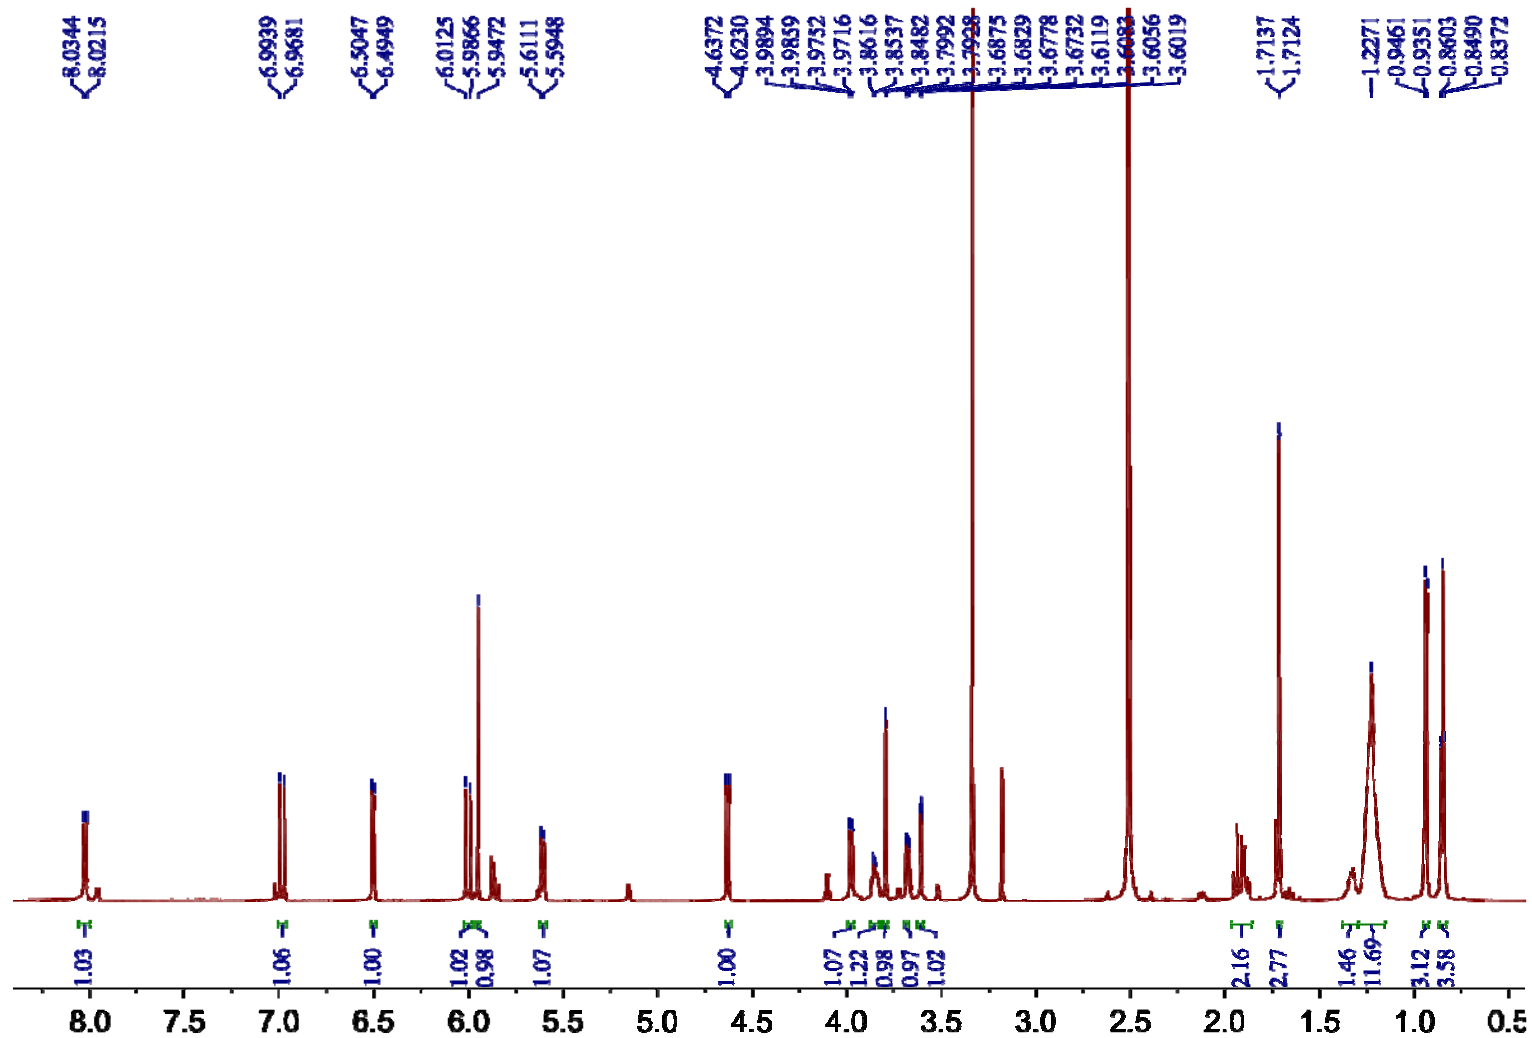

Figure S2.  $^1\text{H}$  NMR (600MHz,  $\text{DMSO}-d_6$ ) spectrum of compound 1.

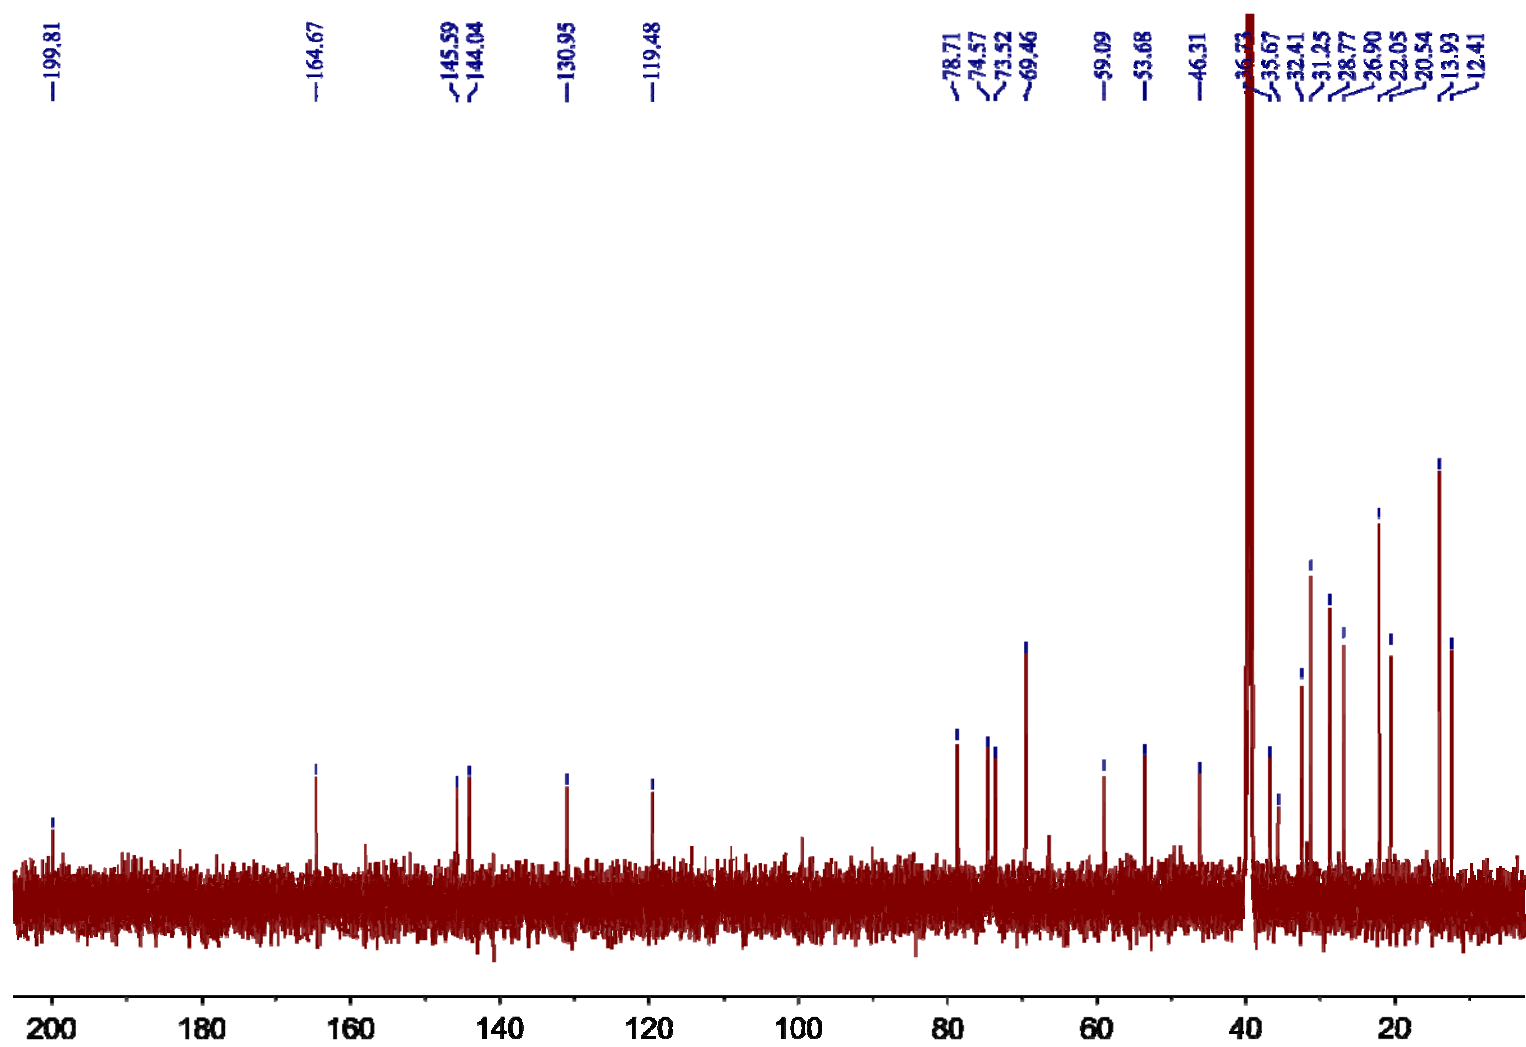

Figure S3.  $^{13}\text{C}$  NMR (150MHz,  $\text{DMSO}-d_6$ ) spectrum of compound 1.

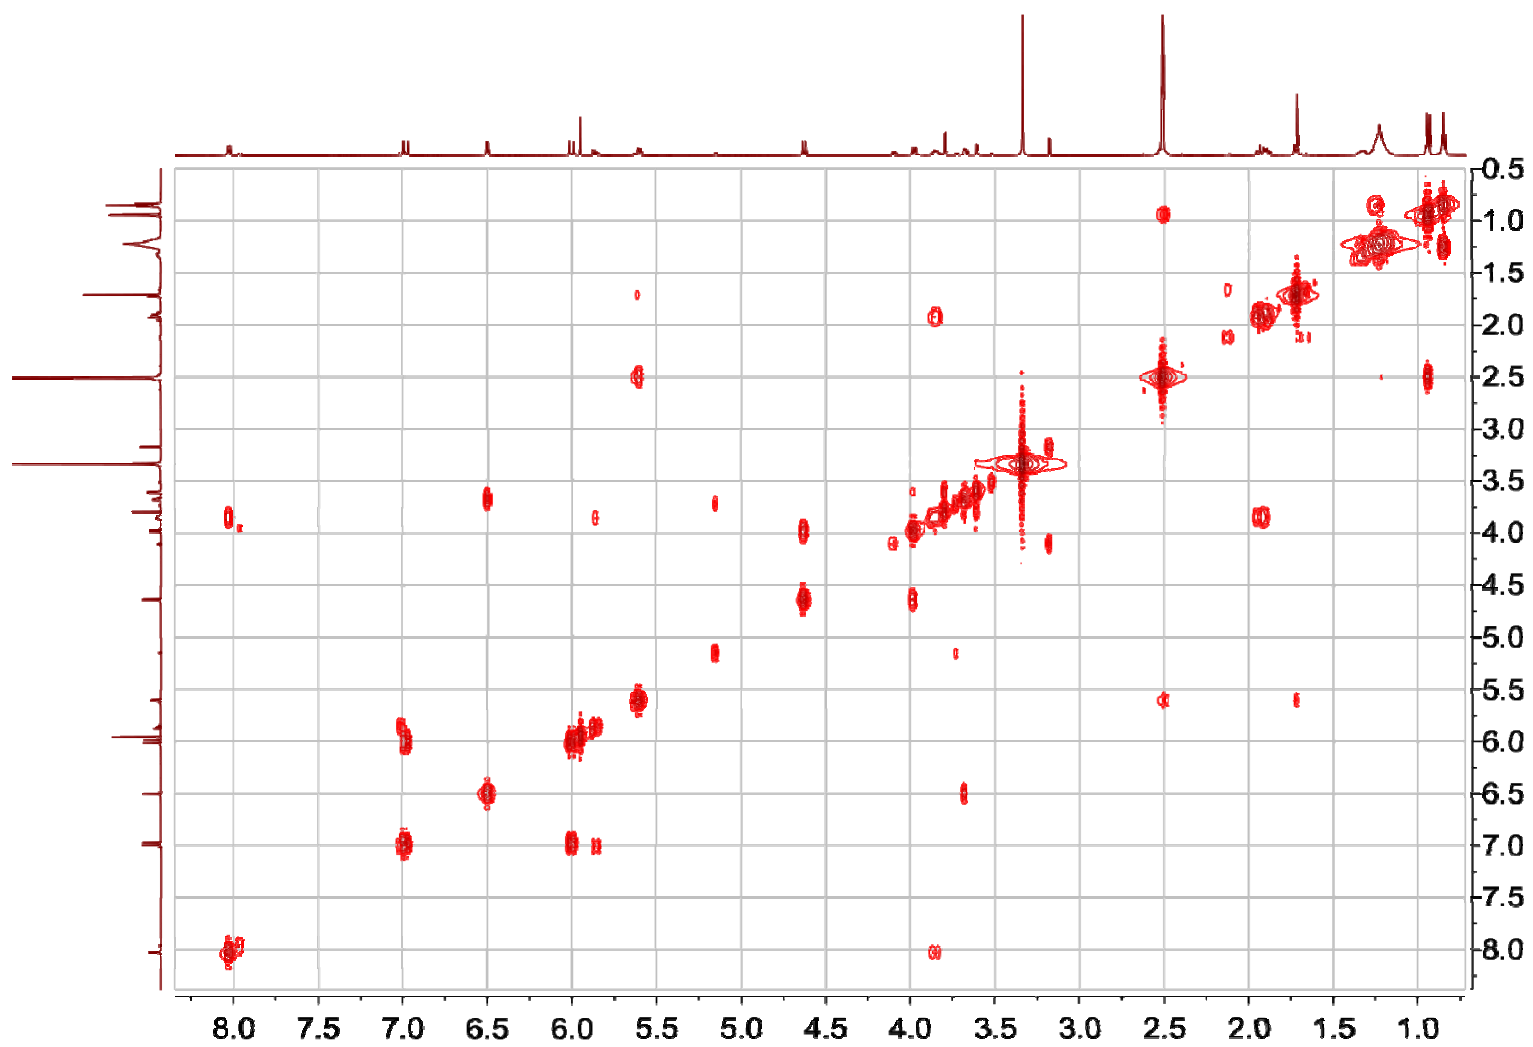

Figure S4.  $^1\text{H}$ - $^1\text{H}$  COSY (600MHz,  $\text{DMSO}-d_6$ ) spectrum of compound 1.

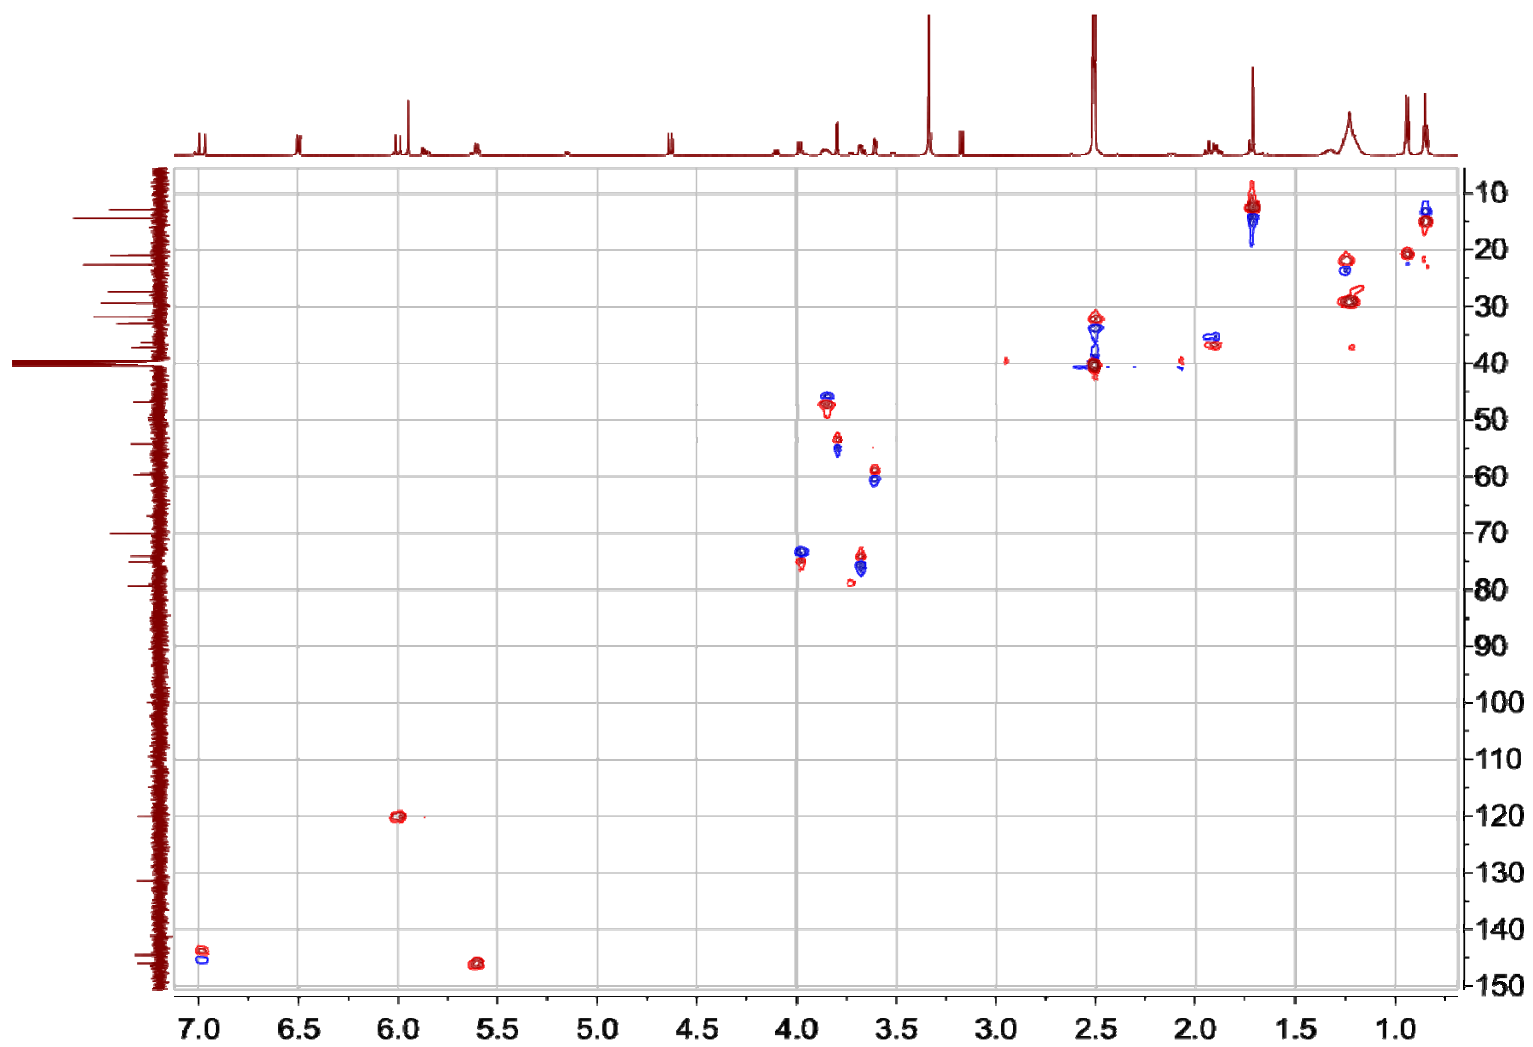

Figure S5. HSQC (600MHz, 150MHz, DMSO- $d_6$ ) spectrum of compound 1.



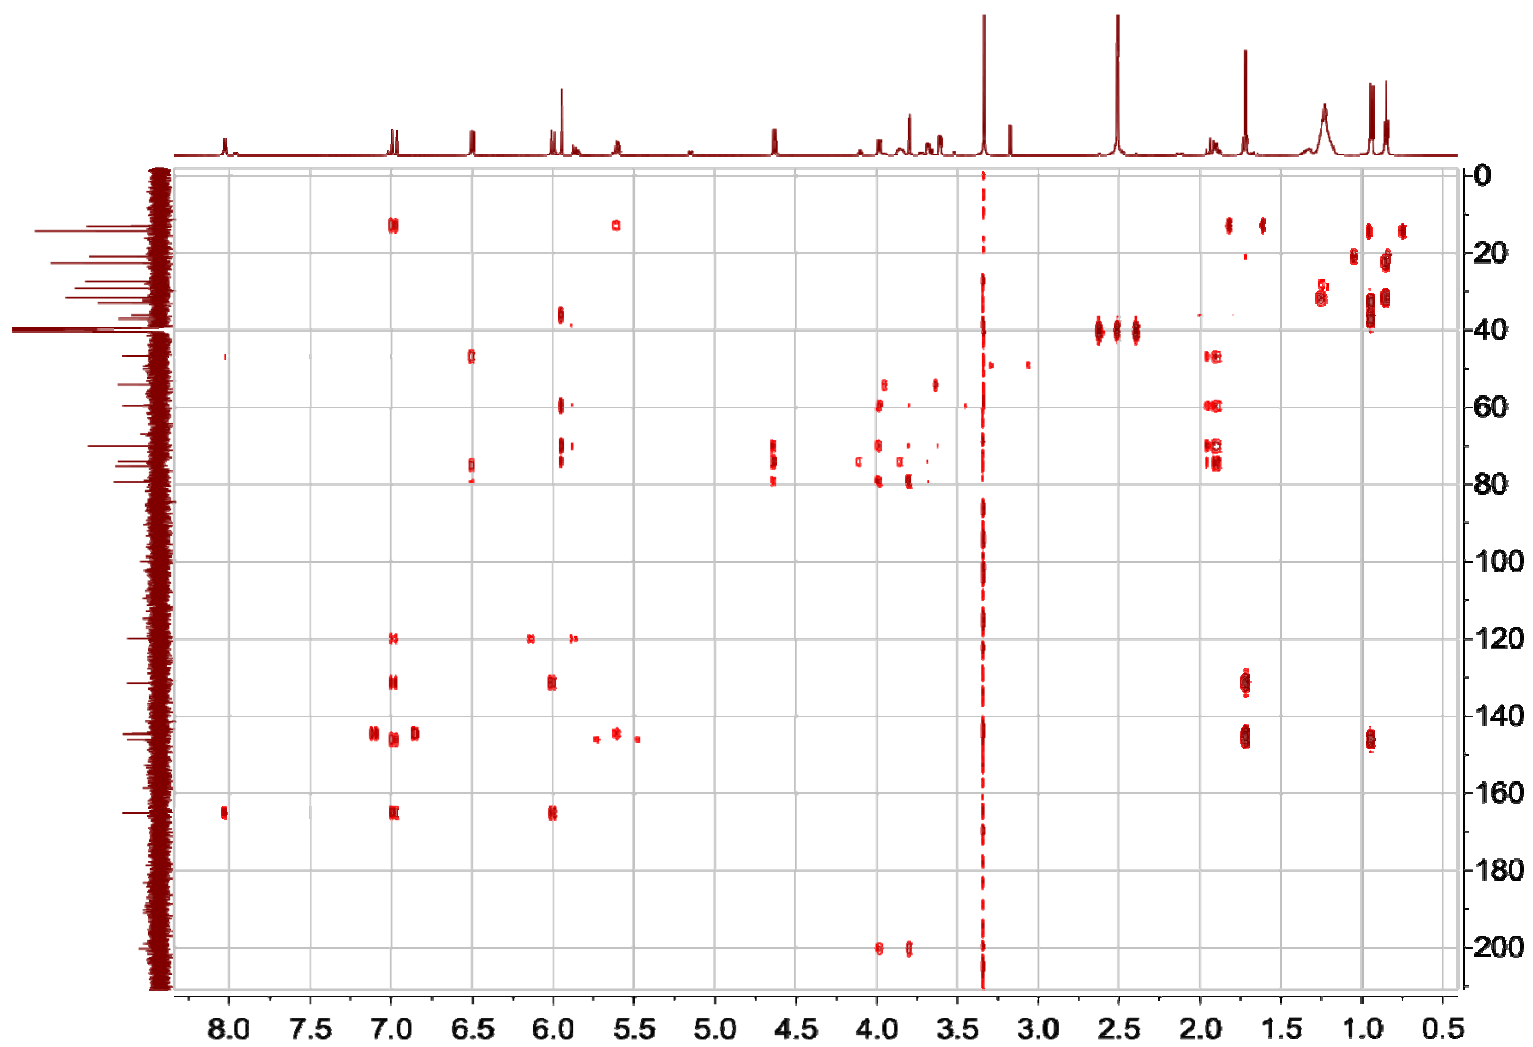

Figure S6. HMBC (600MHz, 150MHz, DMSO- $d_6$ ) spectrum of compound 1.

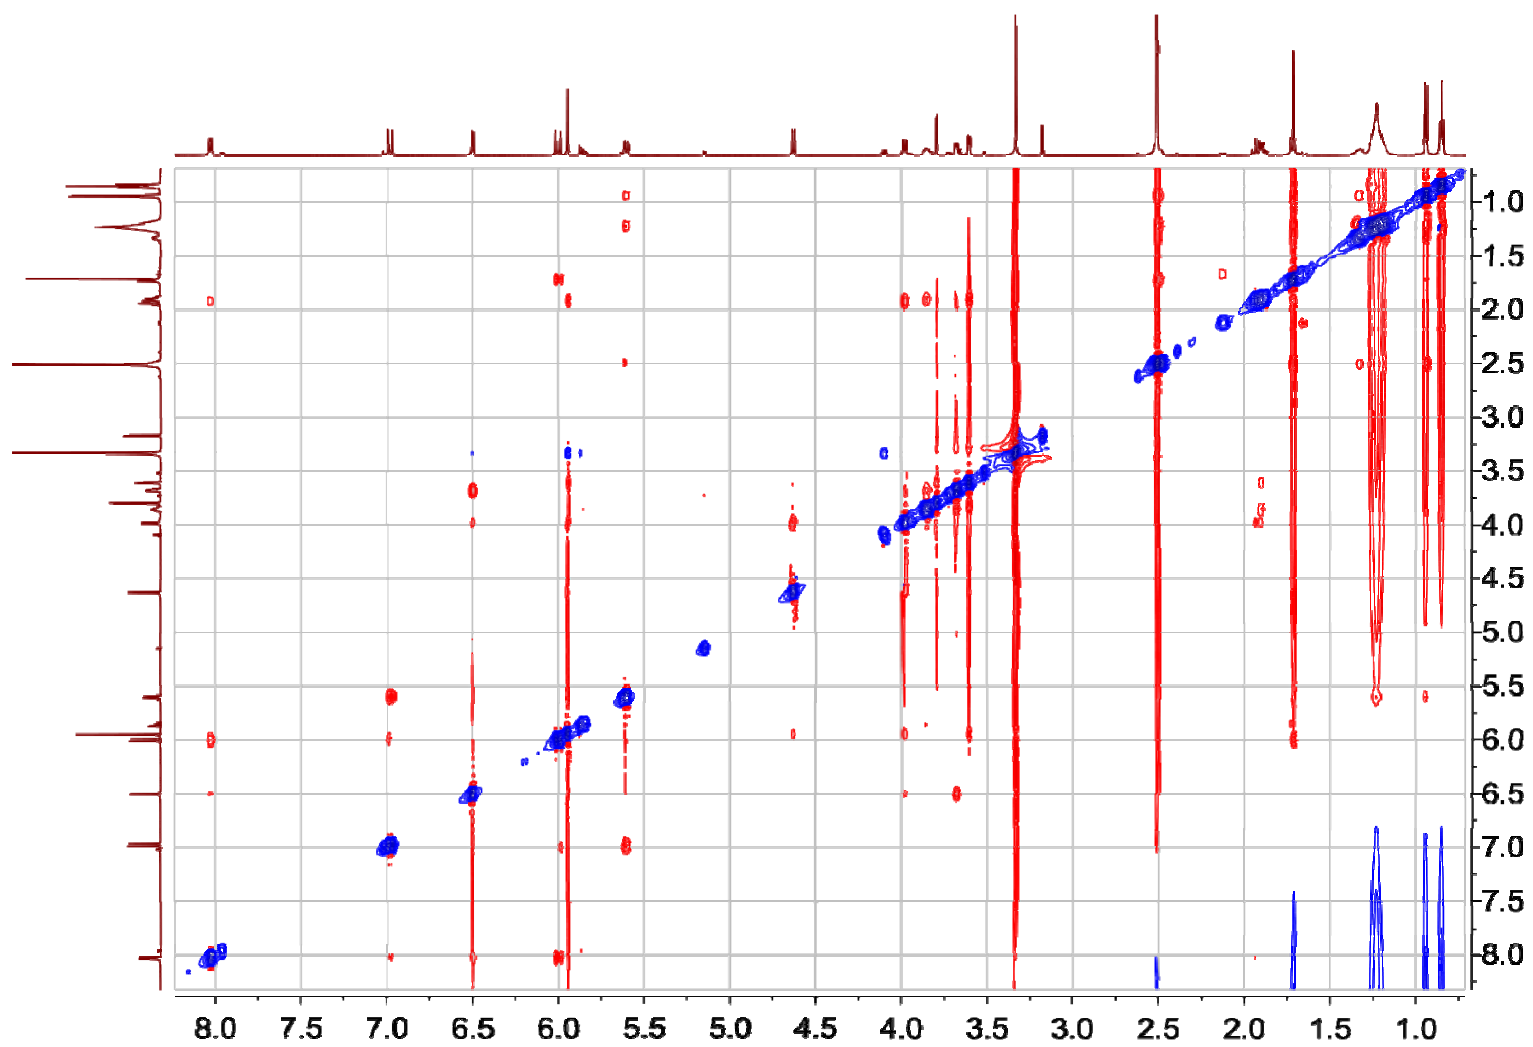

Figure S7. ROESY (600MHz, DMSO- $d_6$ ) spectrum of compound 1.

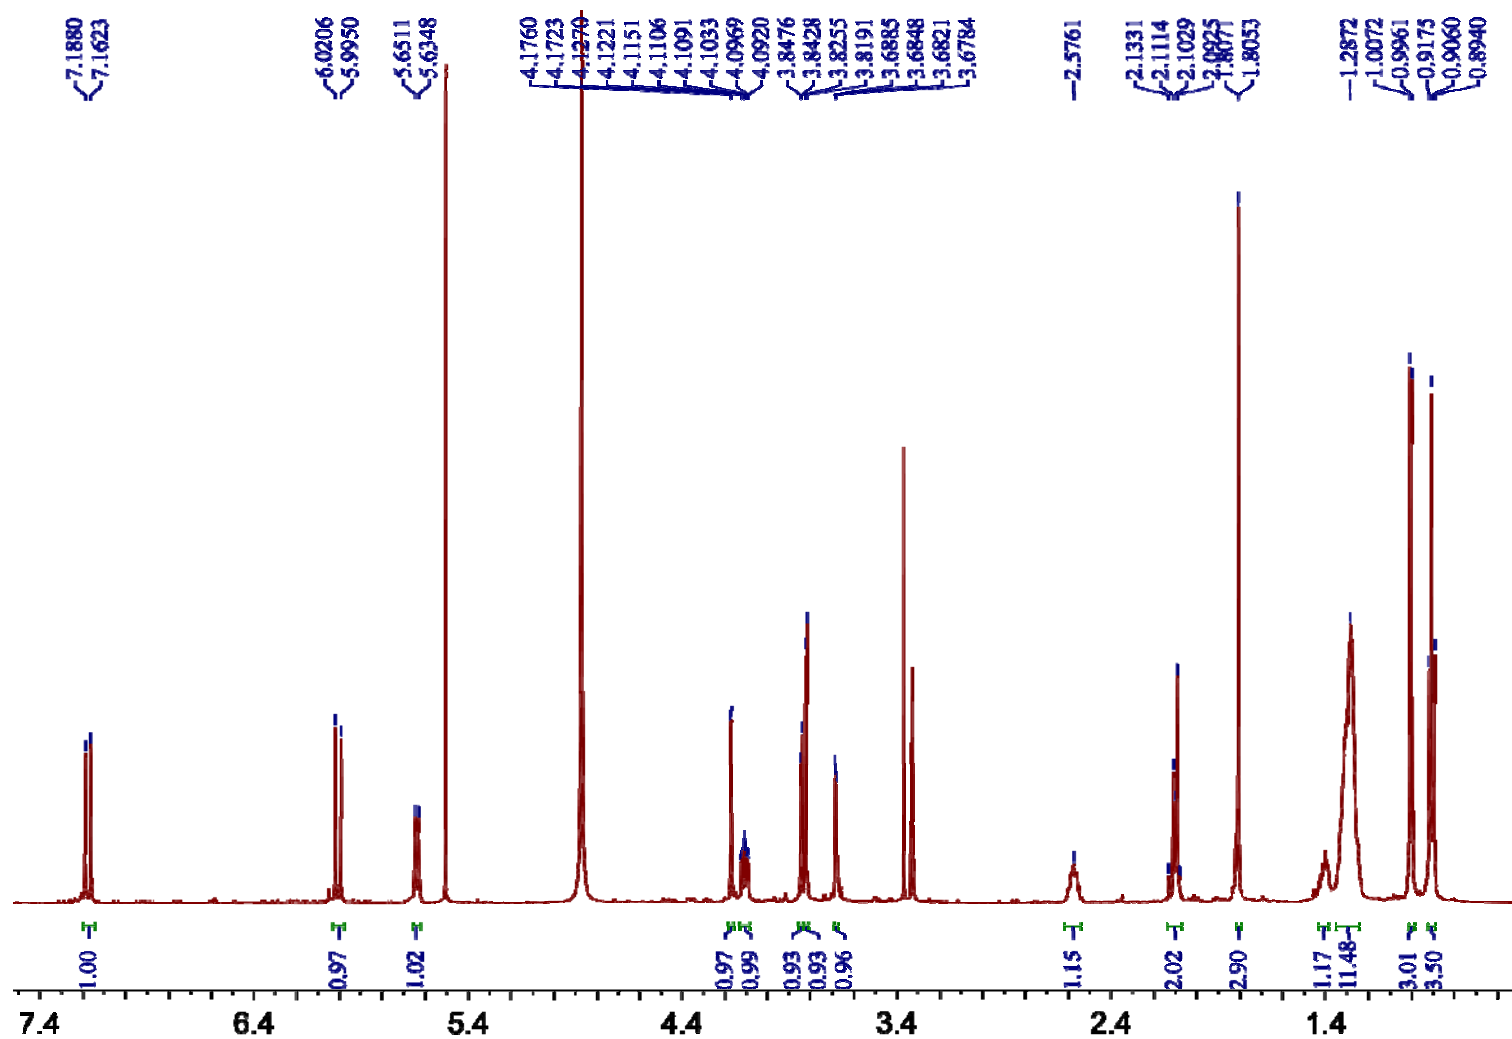

Figure S8.  $^1\text{H}$  NMR (600MHz, methanol- $d_4$ ) spectrum of compound 1.

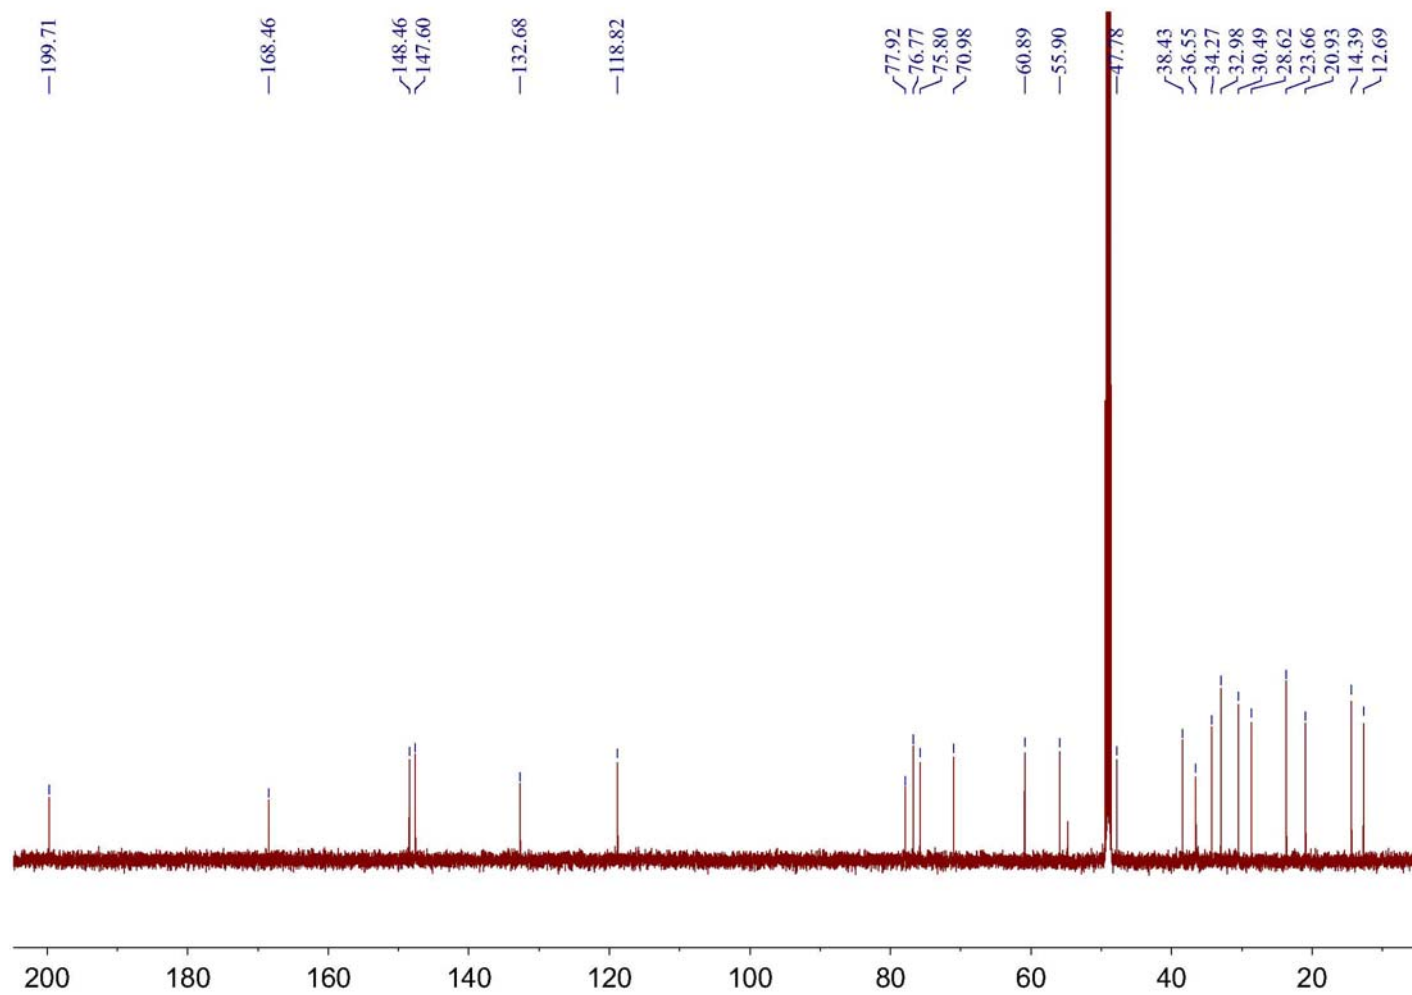

**Figure S9.**  $^{13}\text{C}$  NMR (150MHz, methanol- $d_4$ ) spectrum of compound **1**.

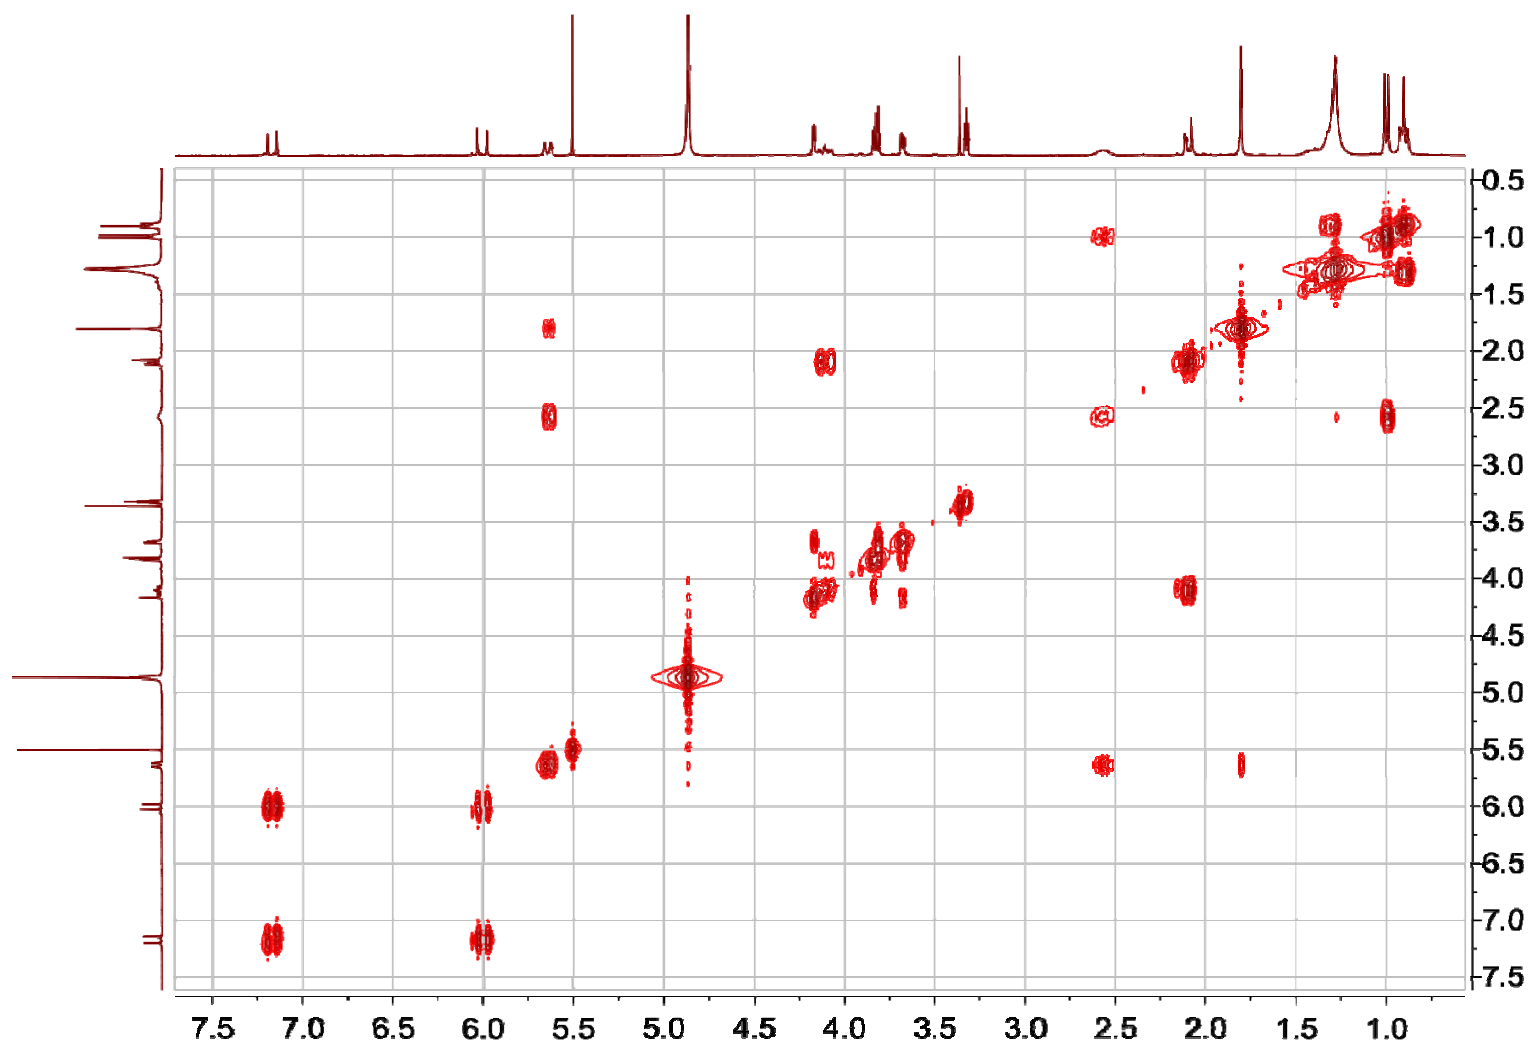

Figure S10.  $^1\text{H}$ - $^1\text{H}$  COSY (600MHz, methanol- $d_4$ ) spectrum of compound 1.

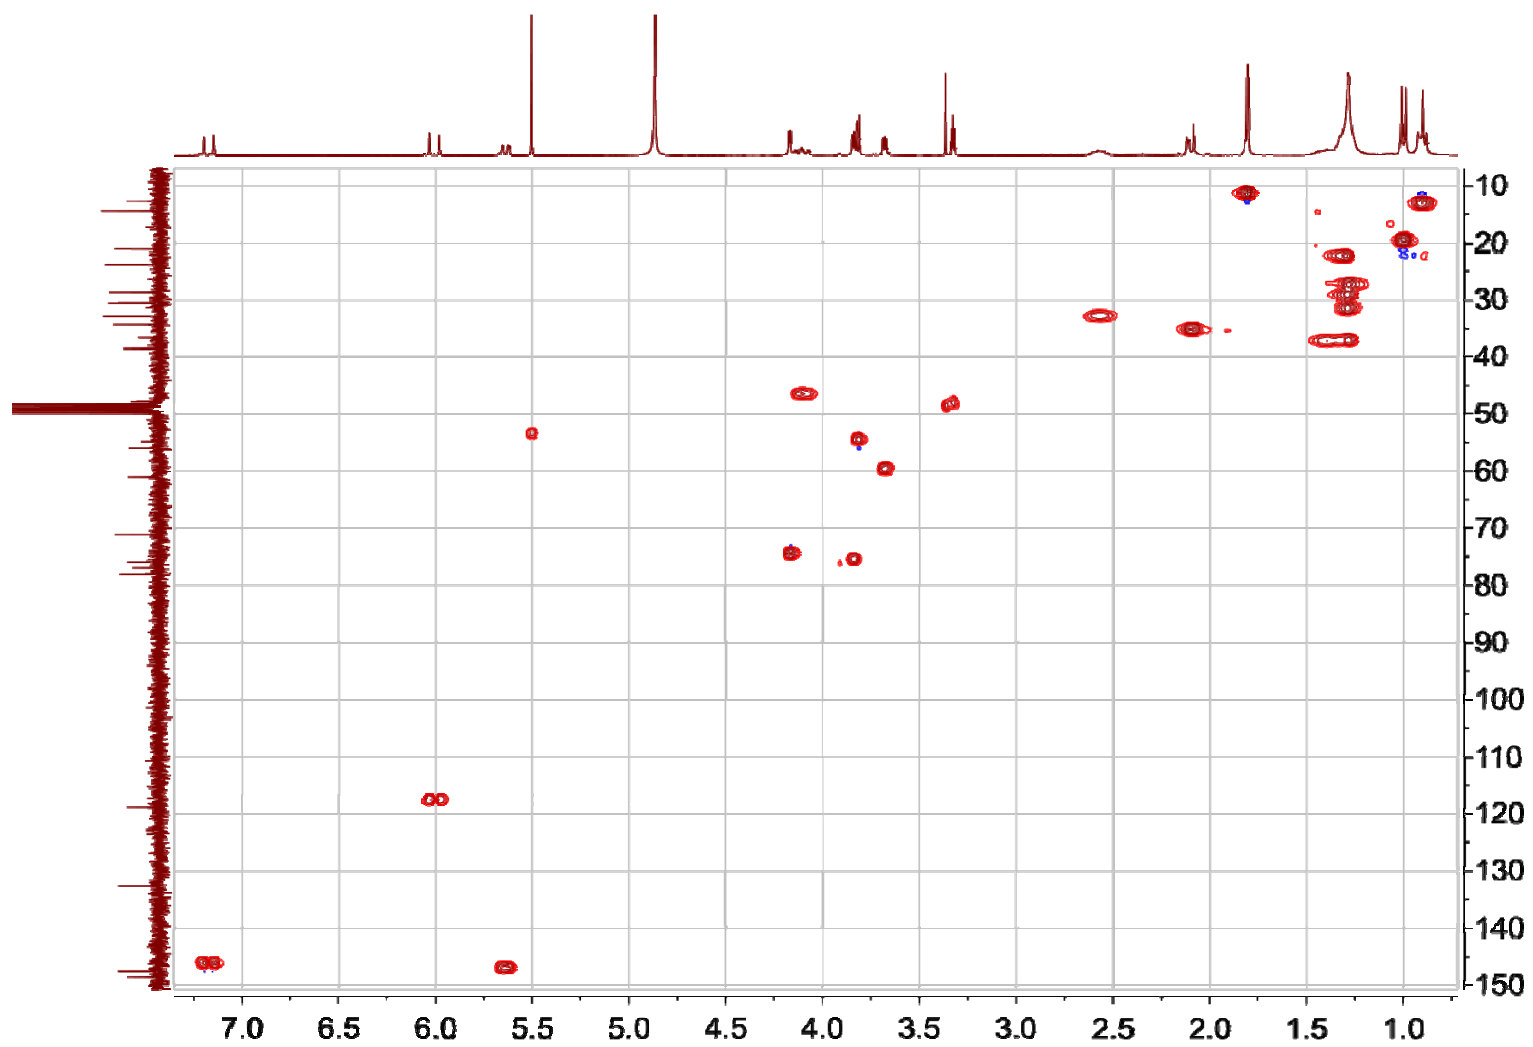

Figure S11. HSQC (600 MHz, 150 MHz, methanol- $d_4$ ) spectrum of compound 1.

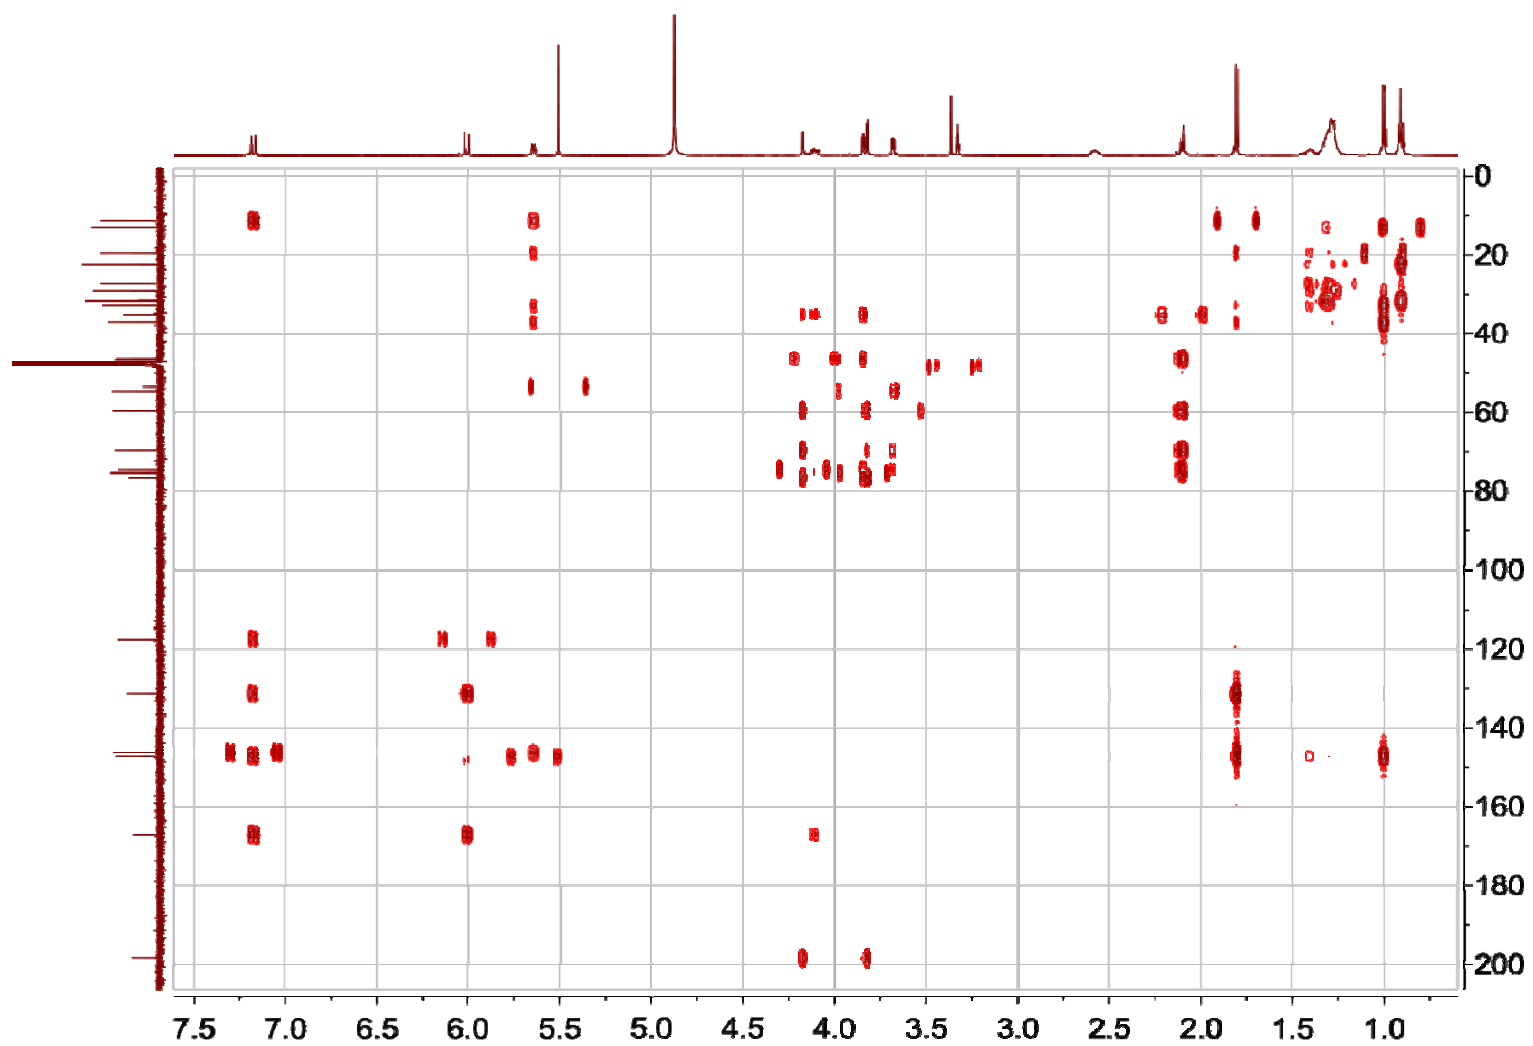

Figure S12. HMBC (600MHz, 150MHz, methanol-*d*<sub>4</sub>) spectrum of compound 1.

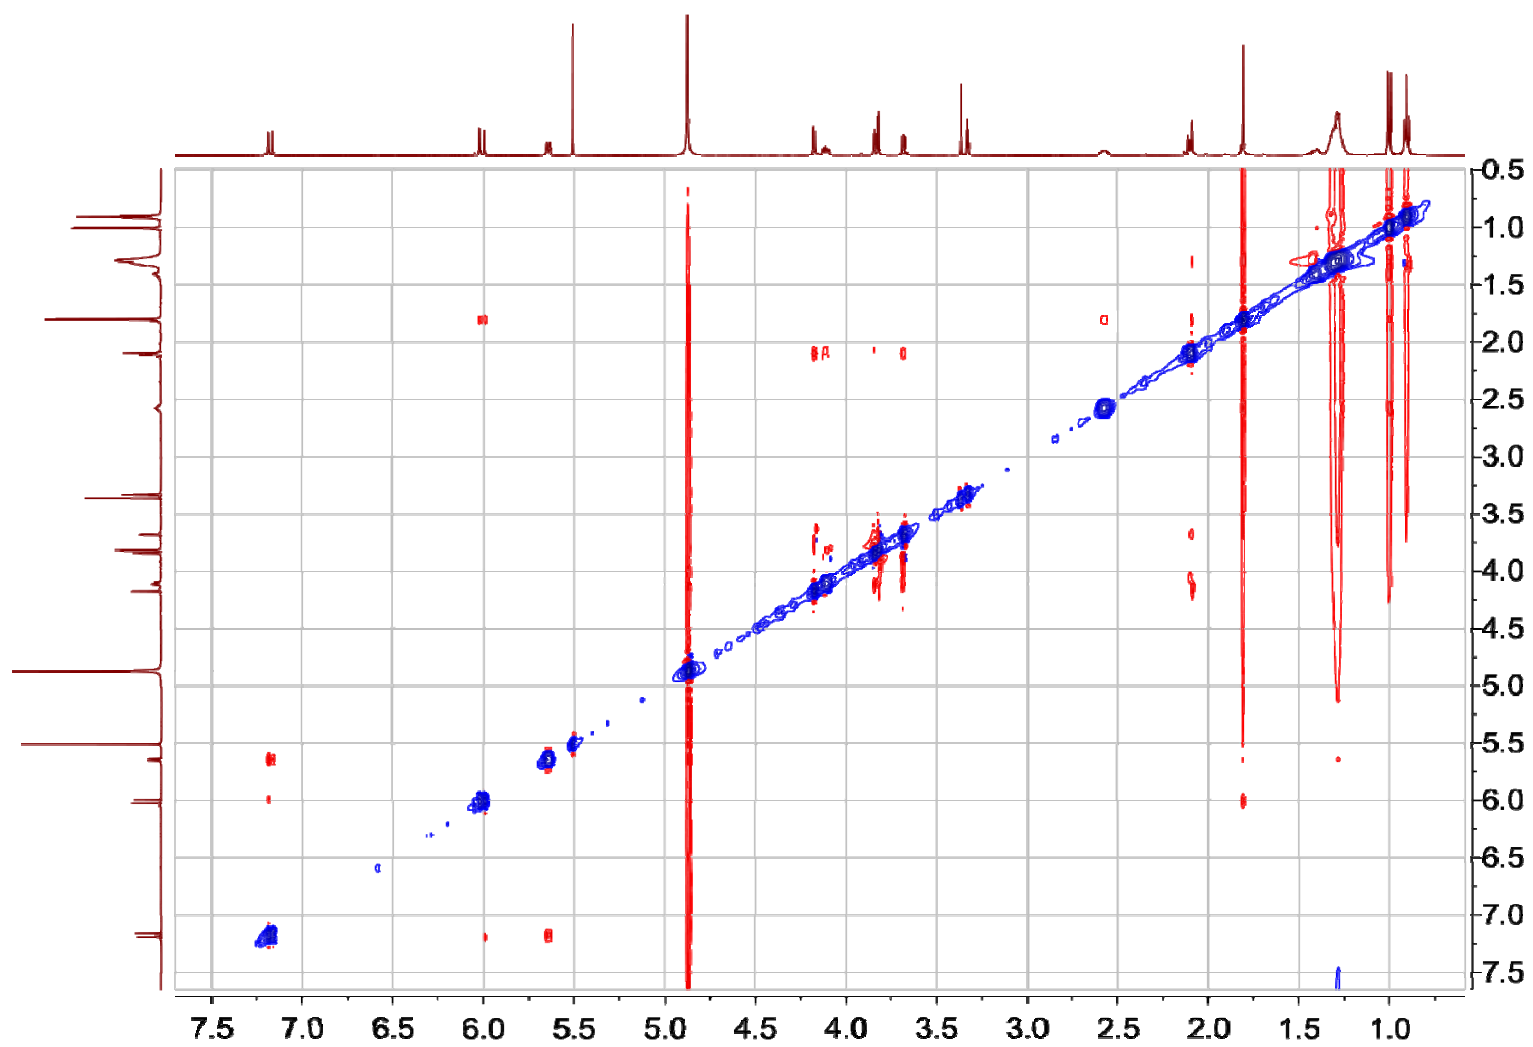

Figure S13. ROESY (600MHz, methanol- $d_4$ ) spectrum of compound 1.



## Mass Spectrum SmartFormula Report

### Analysis Info

Analysis Name D:\Data\Spektren 2015\Proksch15HR000327.d  
Method tune\_low.m  
Sample Name Hao Br-5-36-1-m (CH3OH)  
Comment 1 ug/ml

Acquisition Date 9/21/2015 3:19:22 PM

Operator Peter Tommes  
Instrument maXis 288882.20213

### Acquisition Parameter

|             |            |                       |           |                  |           |
|-------------|------------|-----------------------|-----------|------------------|-----------|
| Source Type | ESI        | Ion Polarity          | Positive  | Set Nebulizer    | 0.3 Bar   |
| Focus       | Not active | Set Capillary         | 4000 V    | Set Dry Heater   | 180 °C    |
| Scan Begin  | 50 m/z     | Set End Plate Offset  | -500 V    | Set Dry Gas      | 4.0 l/min |
| Scan End    | 1500 m/z   | Set Collision Cell RF | 600.0 Vpp | Set Divert Valve | Source    |

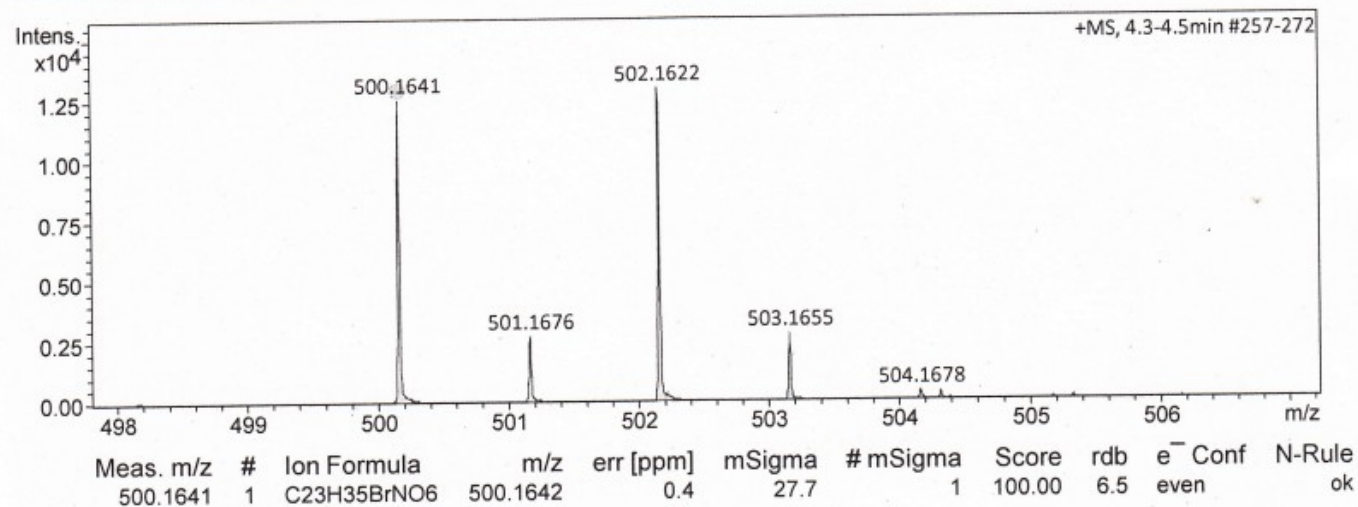

Figure S14. HRESIMS of compound 2.

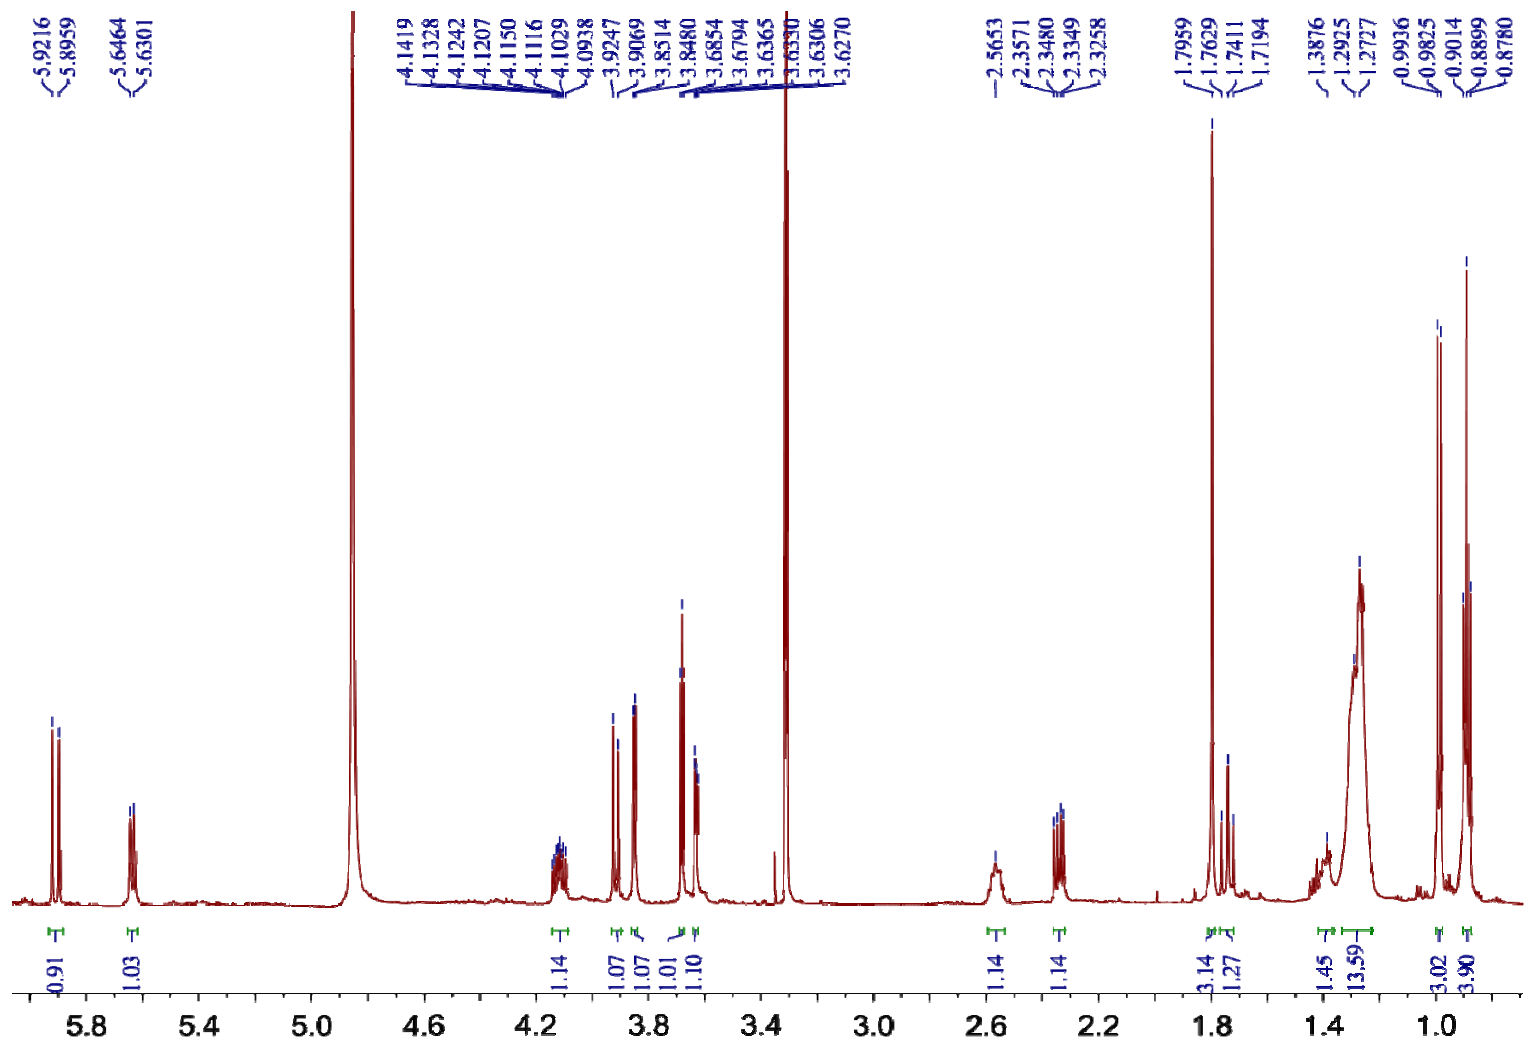

Figure S15.  $^1\text{H}$  NMR (600MHz, methanol- $d_4$ ) spectrum of compound 2.

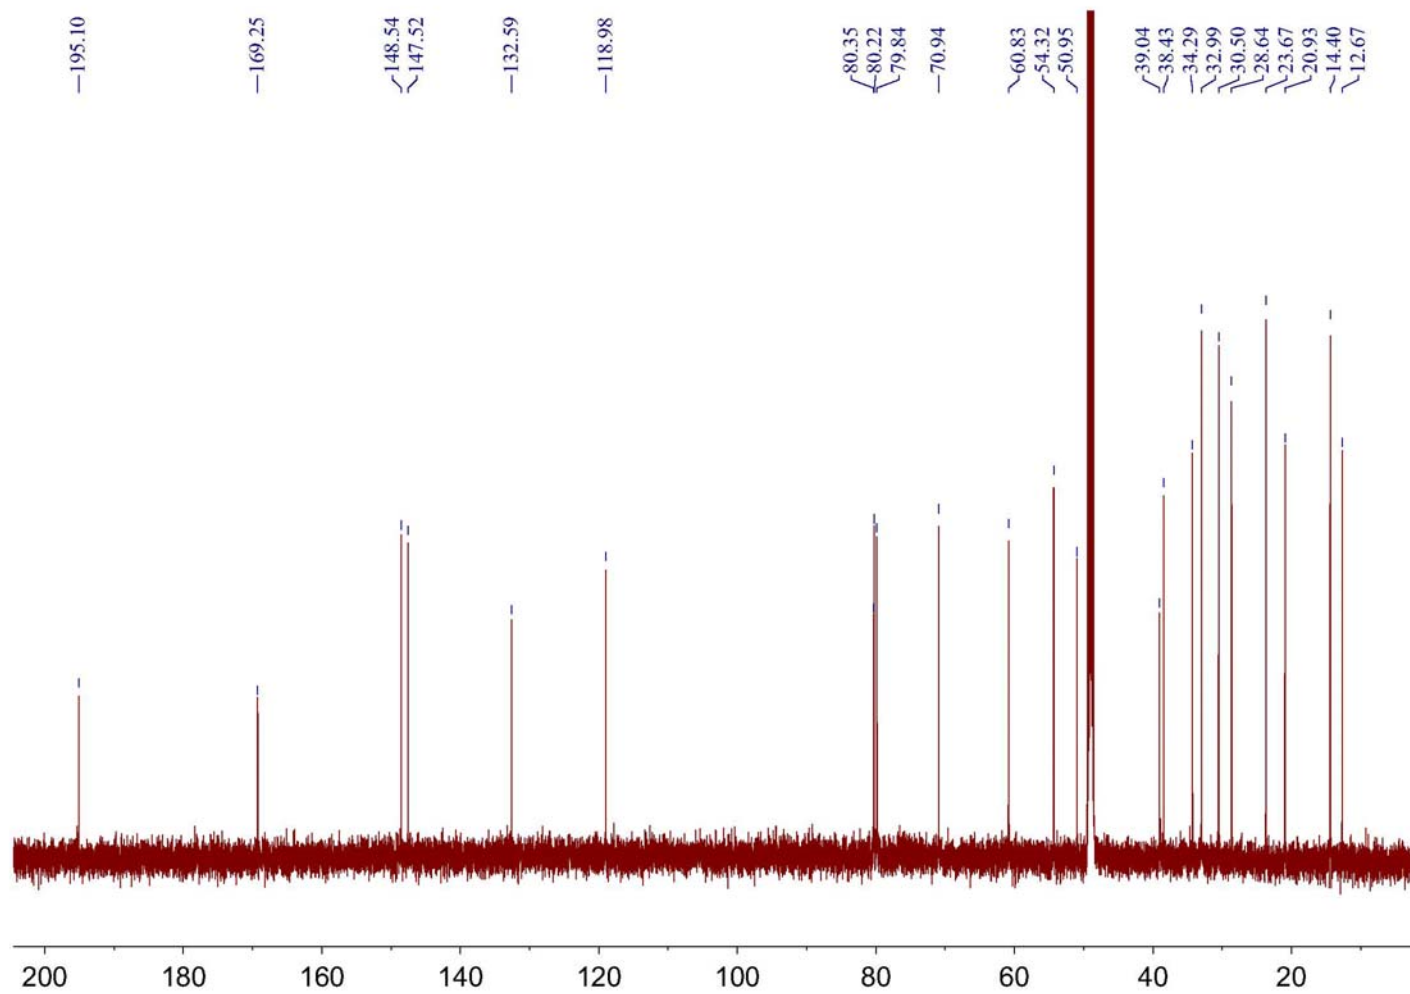

**Figure S16.**  $^{13}\text{C}$  NMR (150MHz, methanol- $d_4$ ) spectrum of compound **2**.

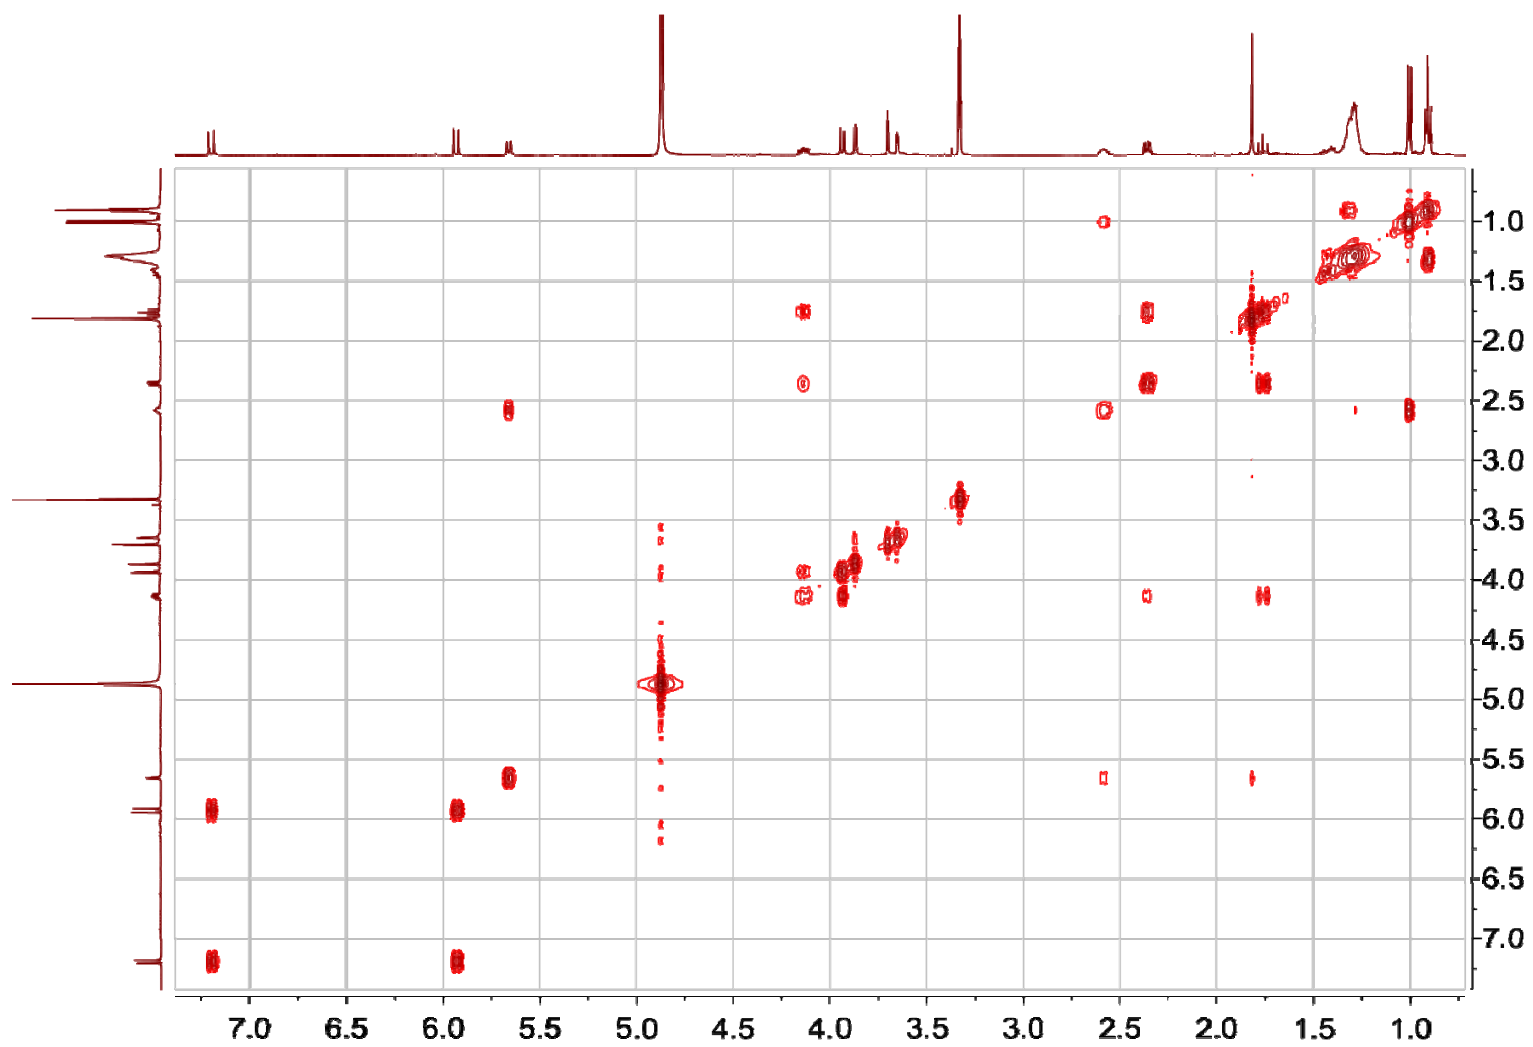

Figure S17.  $^1\text{H}$ - $^1\text{H}$  COSY (600MHz, methanol- $d_4$ ) spectrum of compound 2.

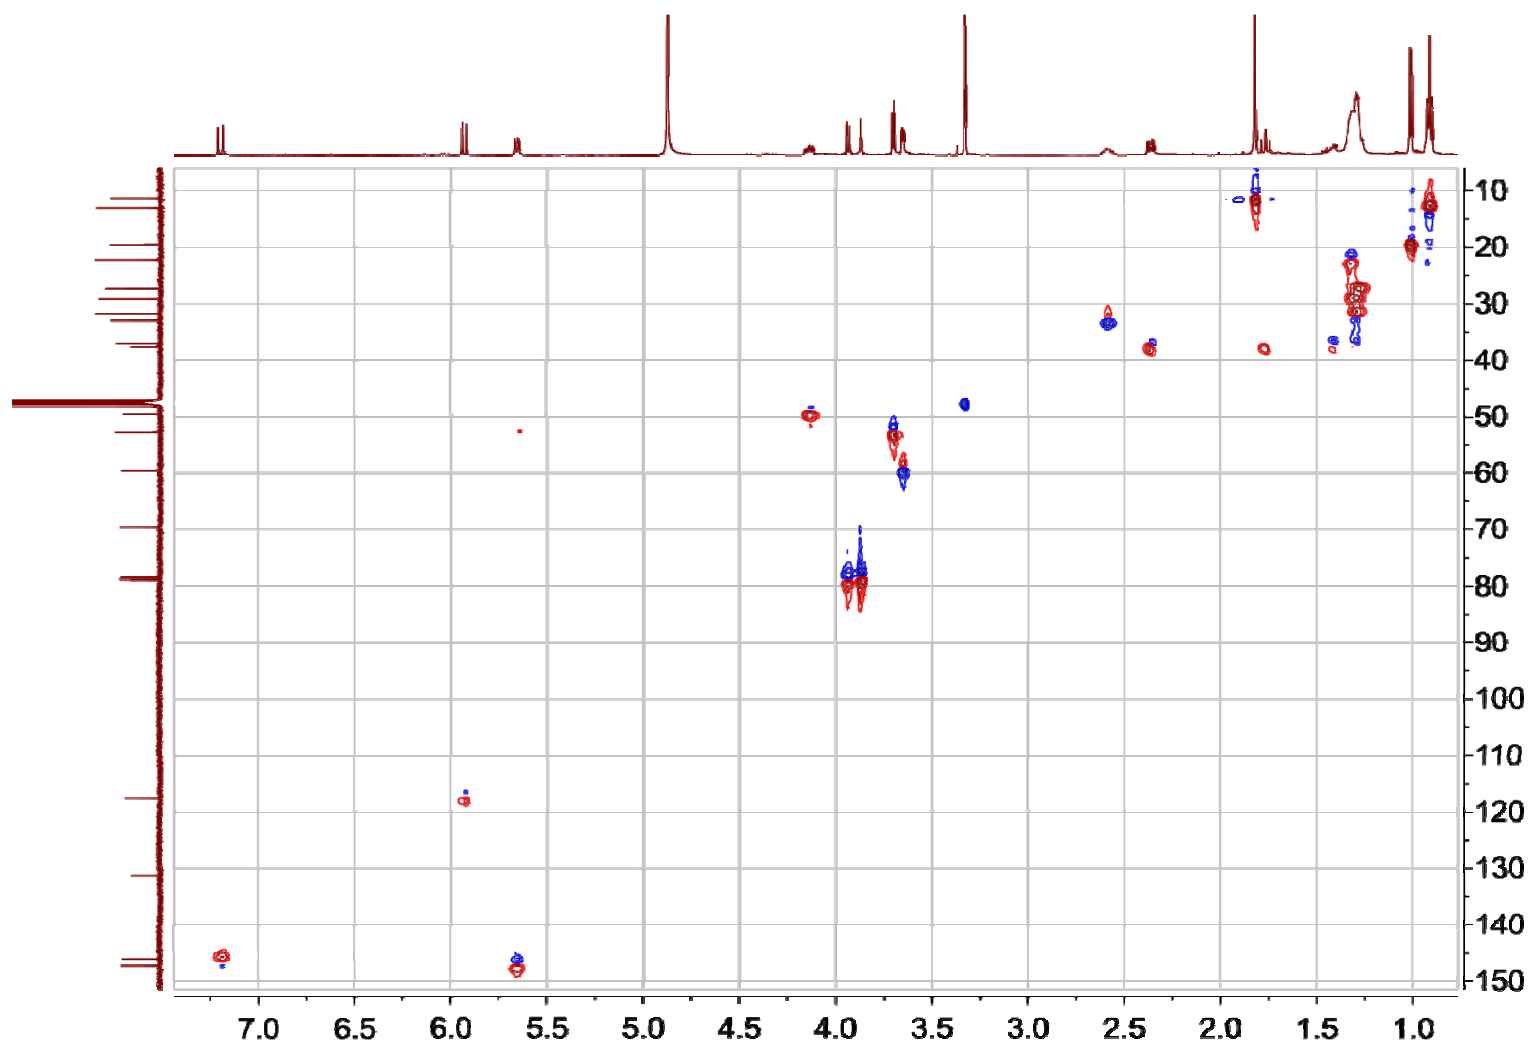

Figure S18. HSQC (600MHz, 150MHz, methanol-*d*<sub>4</sub>) spectrum of compound 2.

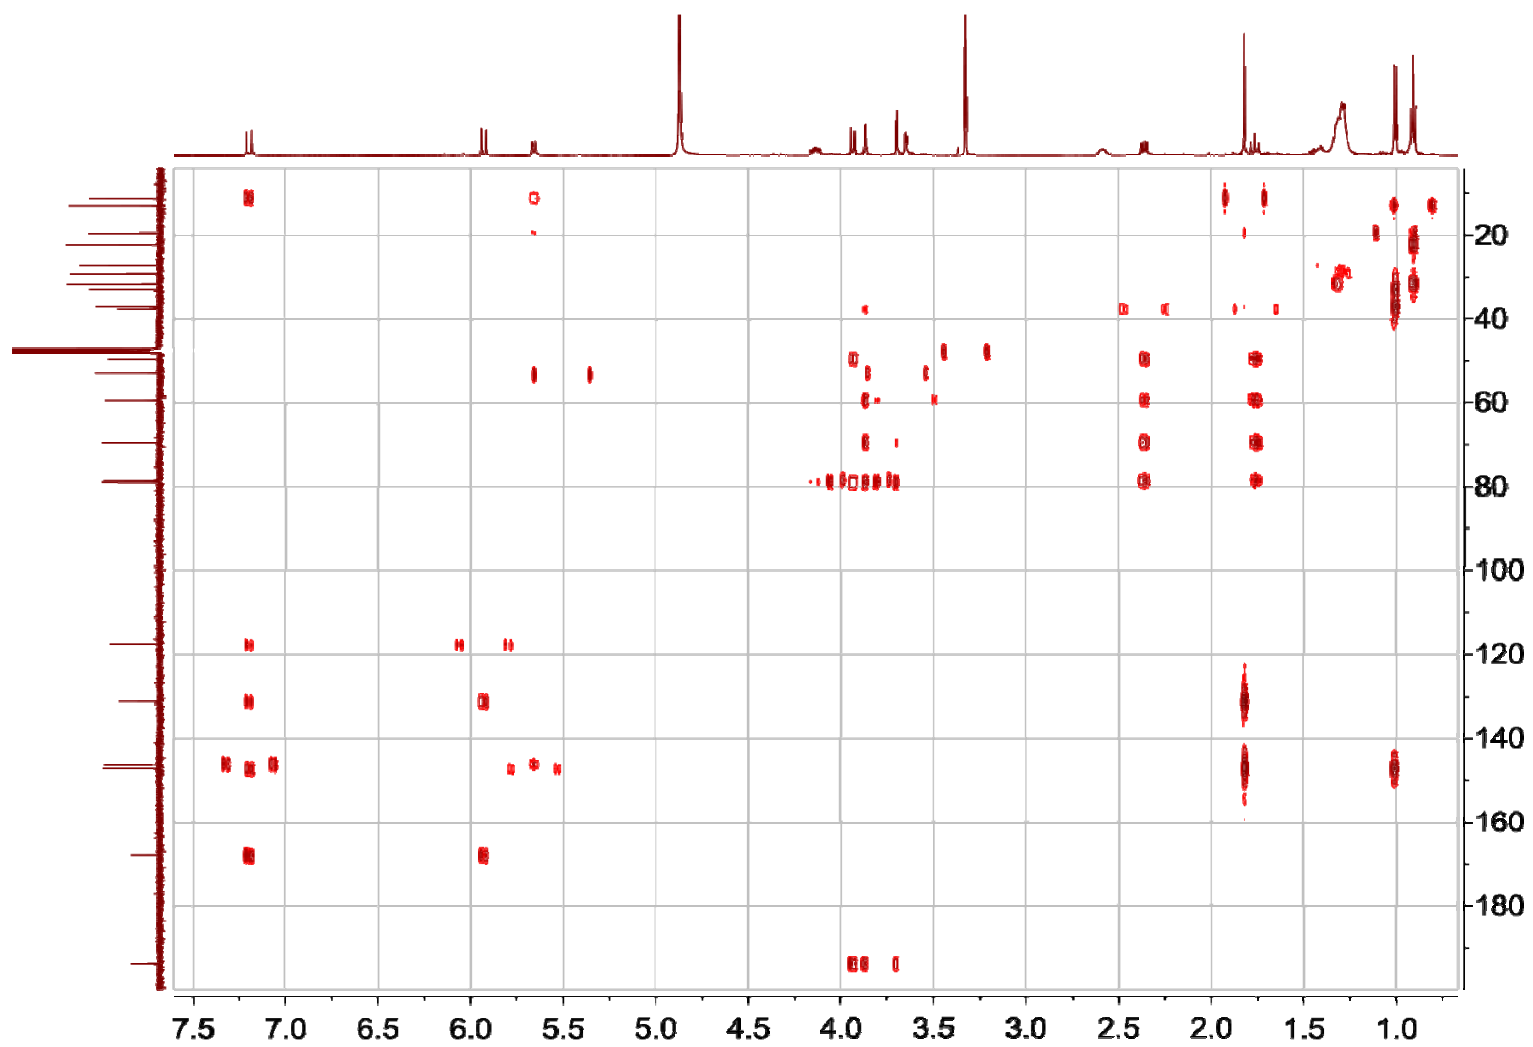

Figure S19. HMBC (600MHz, 150MHz, methanol-*d*<sub>4</sub>) spectrum of compound 2.

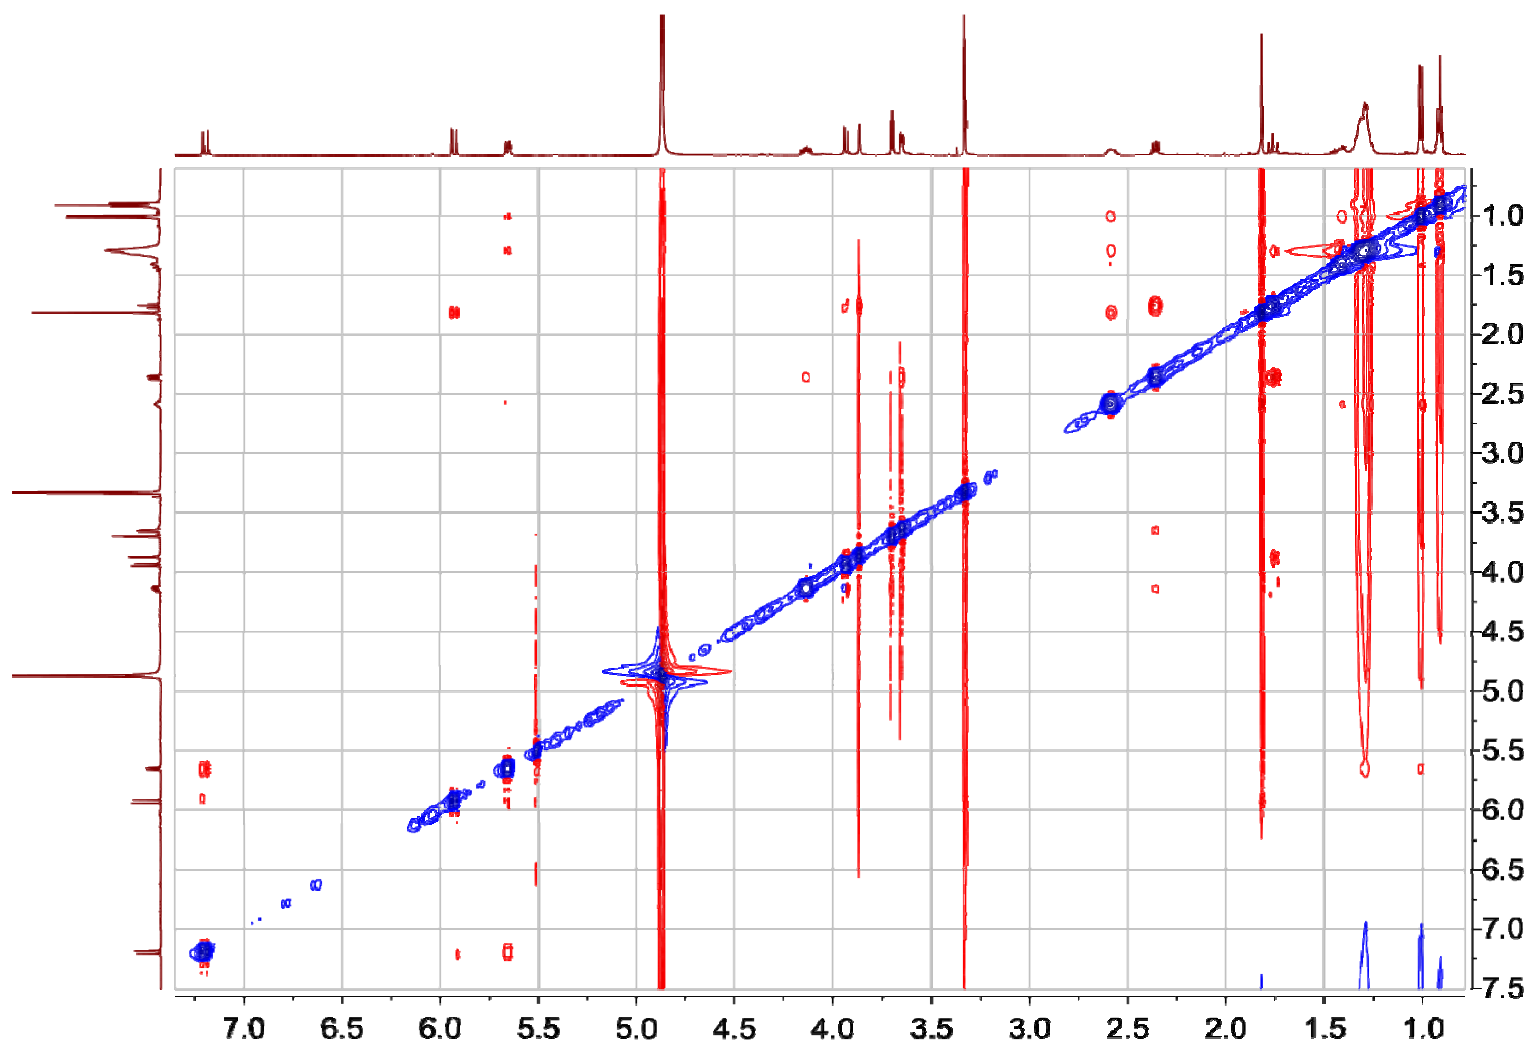

Figure S20. ROESY (600MHz, methanol- $d_4$ ) spectrum of compound 2.

## Mass Spectrum SmartFormula Report

### Analysis Info

Analysis Name D:\Data\Spektren 2015\Proksch15HR000323.d  
 Method tune\_low.m  
 Sample Name Hao Br-3-B-4-2-1 (CH3OH)  
 Comment 1 ug/ml

Acquisition Date 9/21/2015 1:11:49 PM

Operator Peter Tommes  
 Instrument maXis 288882.20213

### Acquisition Parameter

|             |            |                       |           |                  |           |
|-------------|------------|-----------------------|-----------|------------------|-----------|
| Source Type | ESI        | Ion Polarity          | Positive  | Set Nebulizer    | 0.3 Bar   |
| Focus       | Not active | Set Capillary         | 4000 V    | Set Dry Heater   | 180 °C    |
| Scan Begin  | 50 m/z     | Set End Plate Offset  | -500 V    | Set Dry Gas      | 4.0 l/min |
| Scan End    | 1500 m/z   | Set Collision Cell RF | 600.0 Vpp | Set Divert Valve | Source    |

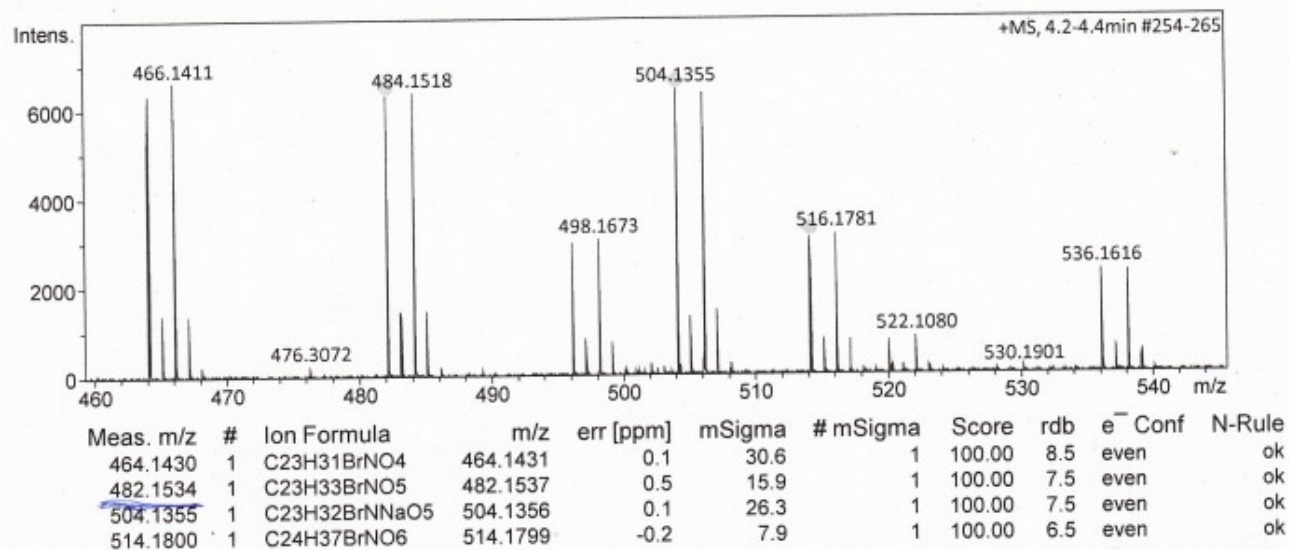

Figure S21. HRESIMS of compound 3.



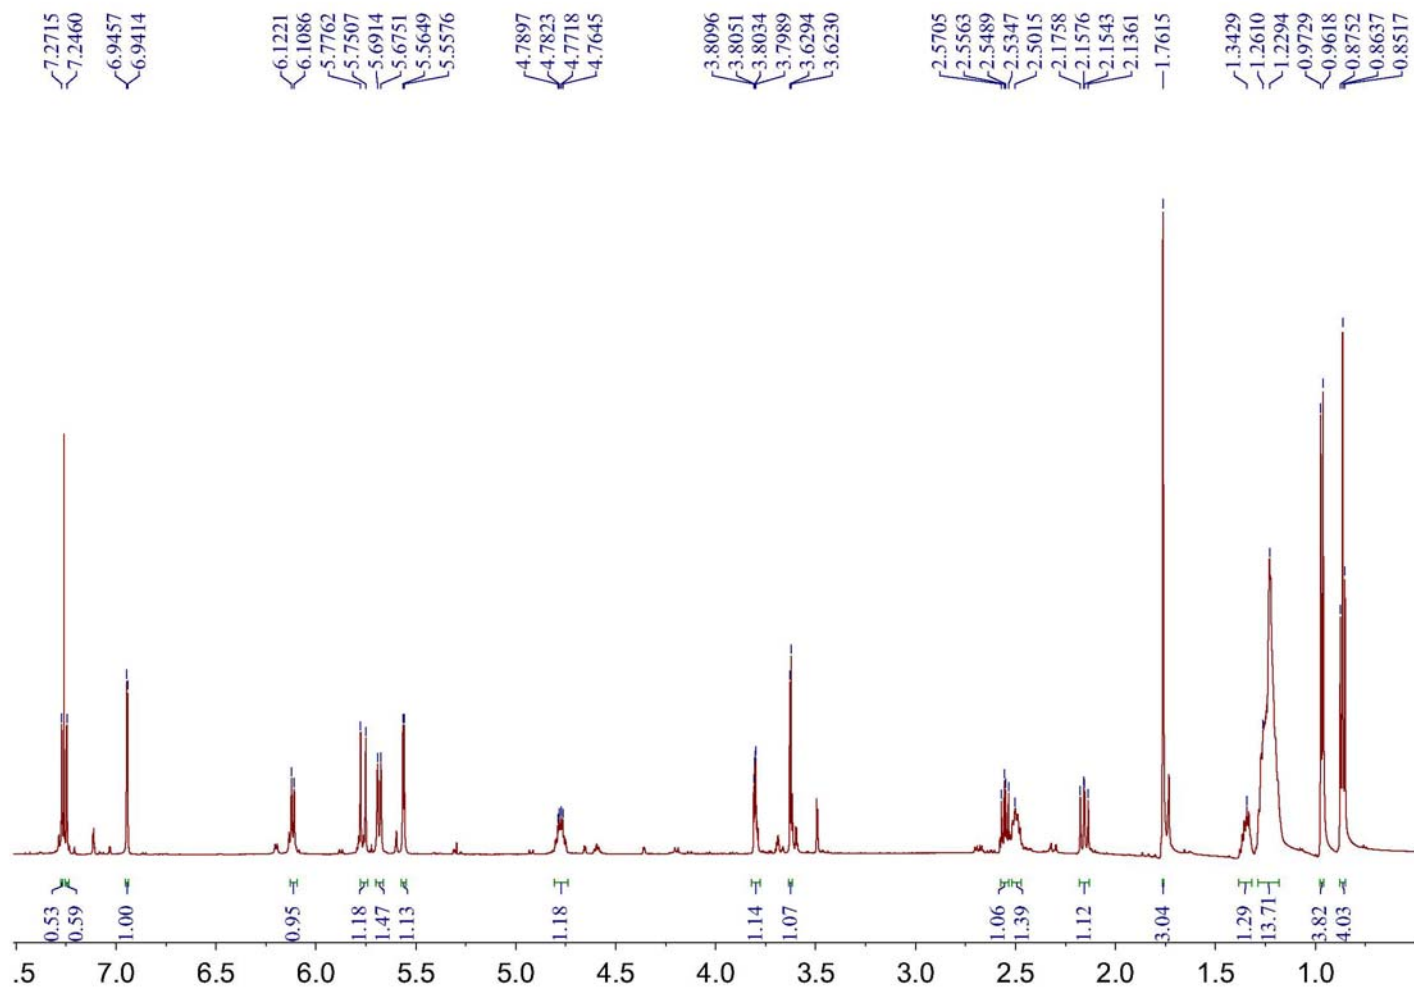

Figure S22. <sup>1</sup>H NMR (600MHz, CDCl<sub>3</sub>) spectrum of compound 3.

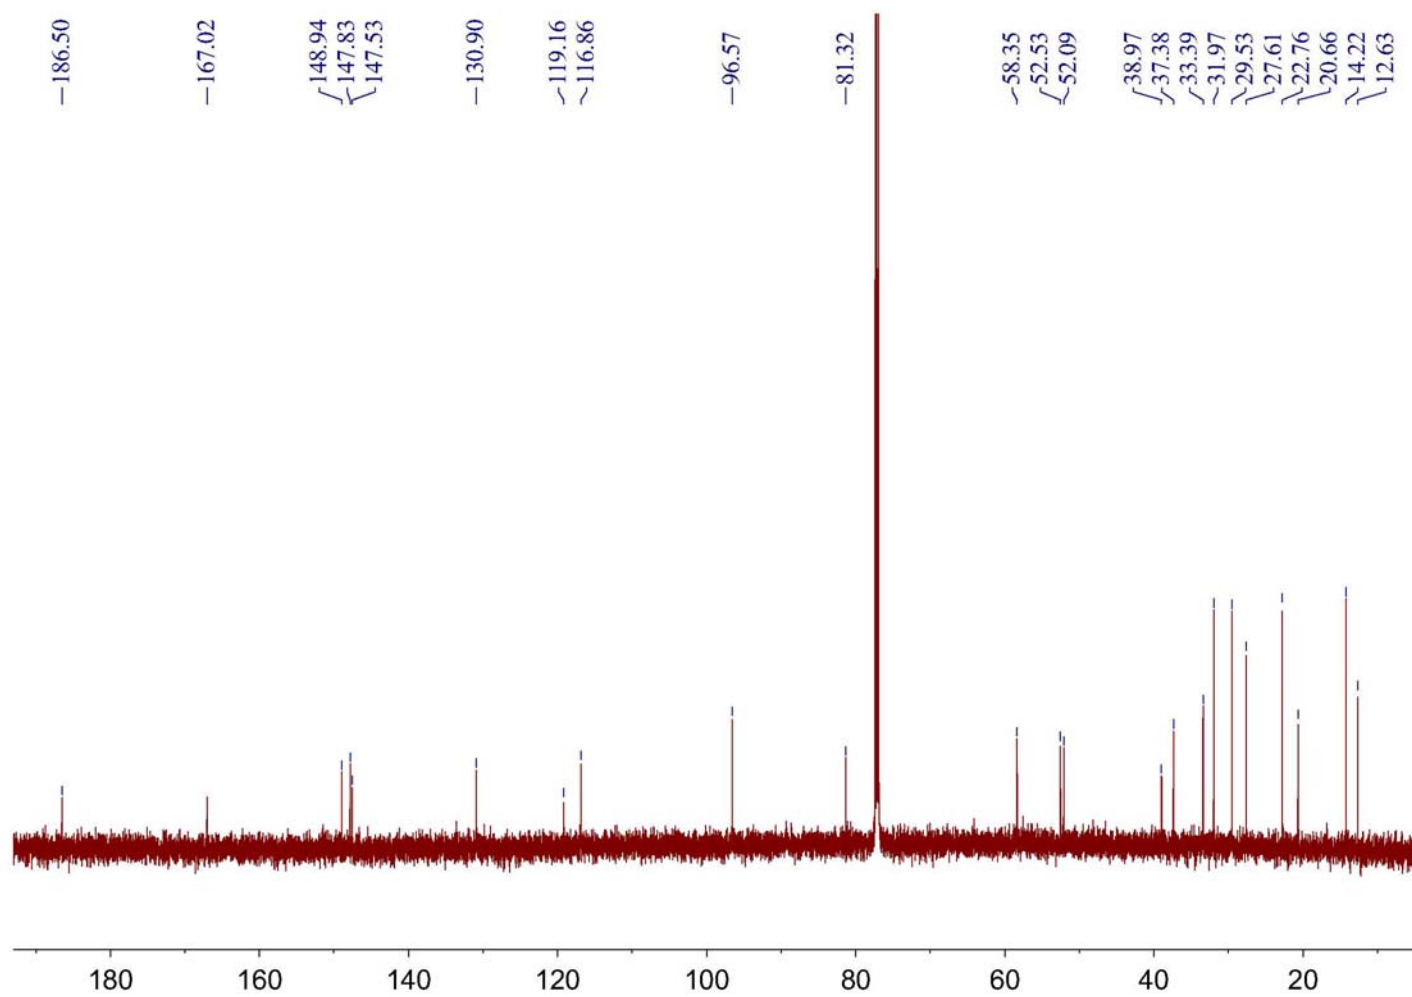

Figure S23.  $^{13}\text{C}$  NMR (150MHz,  $\text{CDCl}_3$ ) spectrum of compound 3.

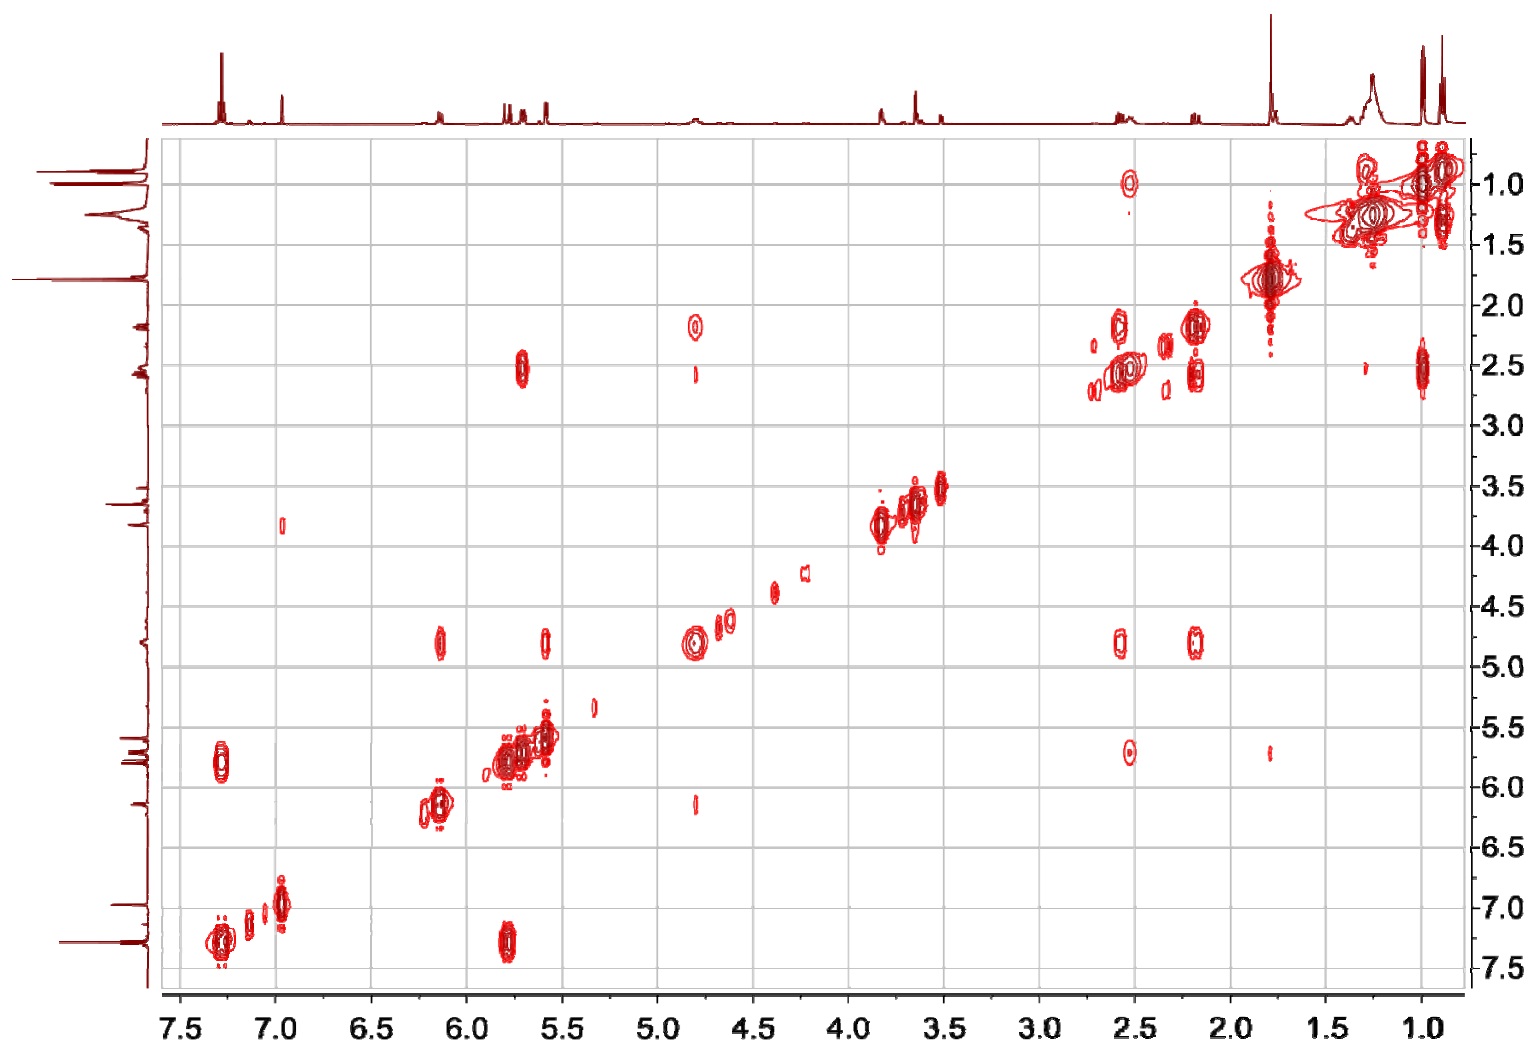

Figure S24.  $^1\text{H}$ - $^1\text{H}$  COSY (600MHz,  $\text{CDCl}_3$ ) spectrum of compound 3.

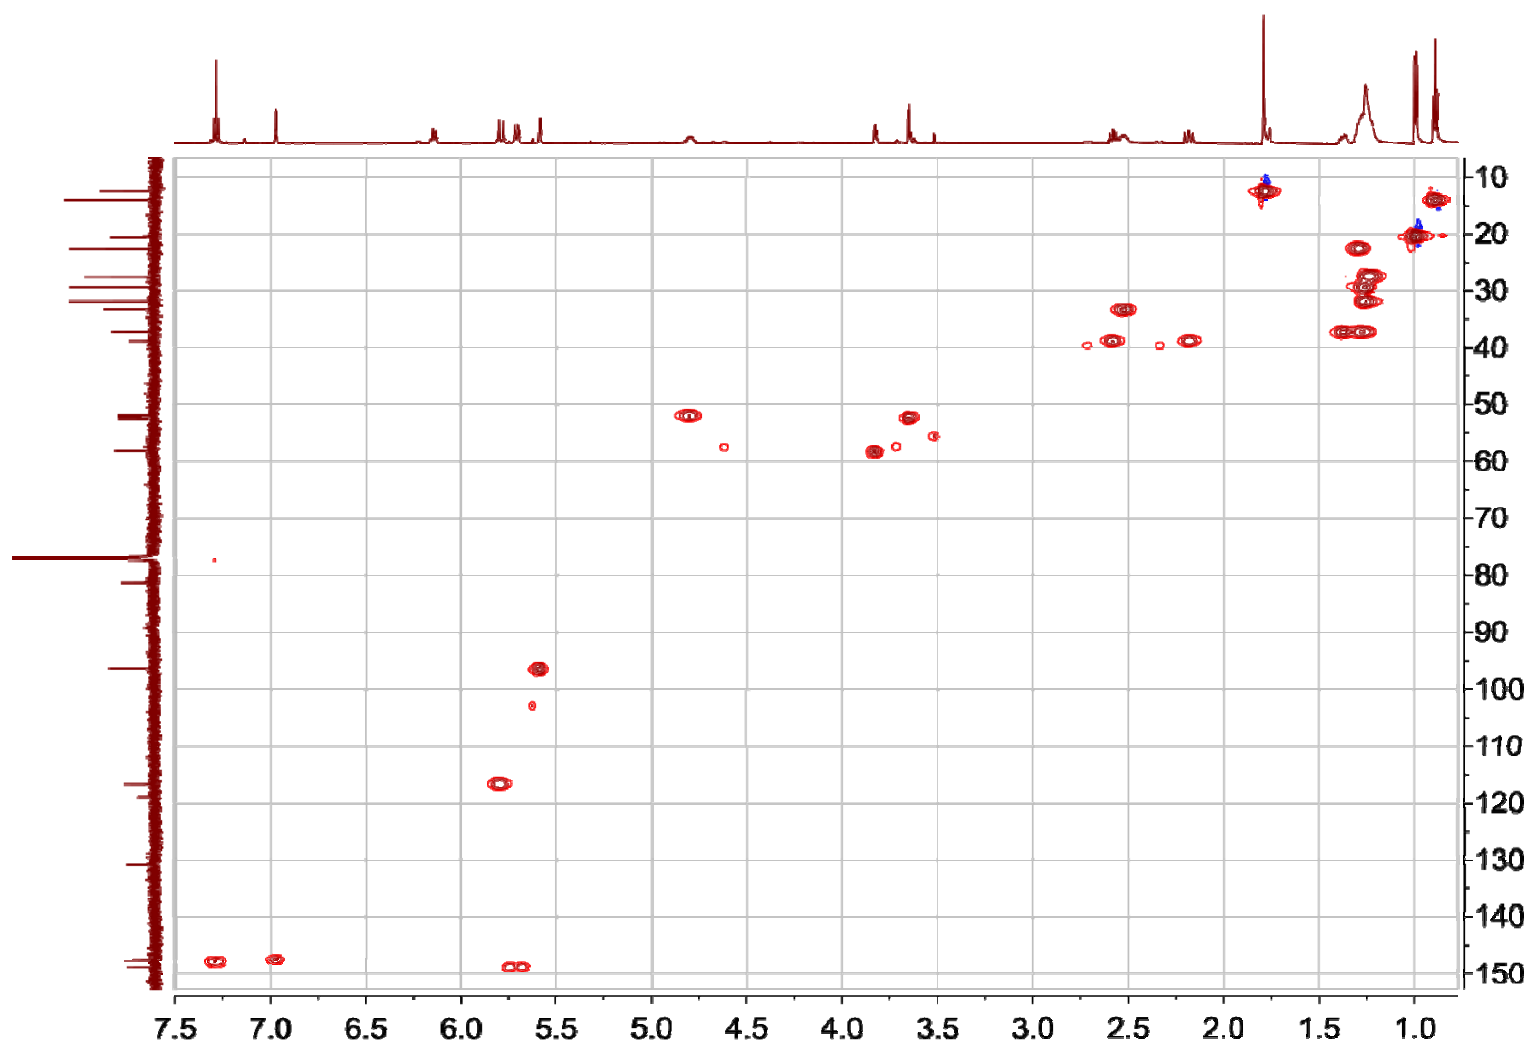

Figure S25. HSQC (600MHz, 150MHz, CDCl<sub>3</sub>) spectrum of compound 3.

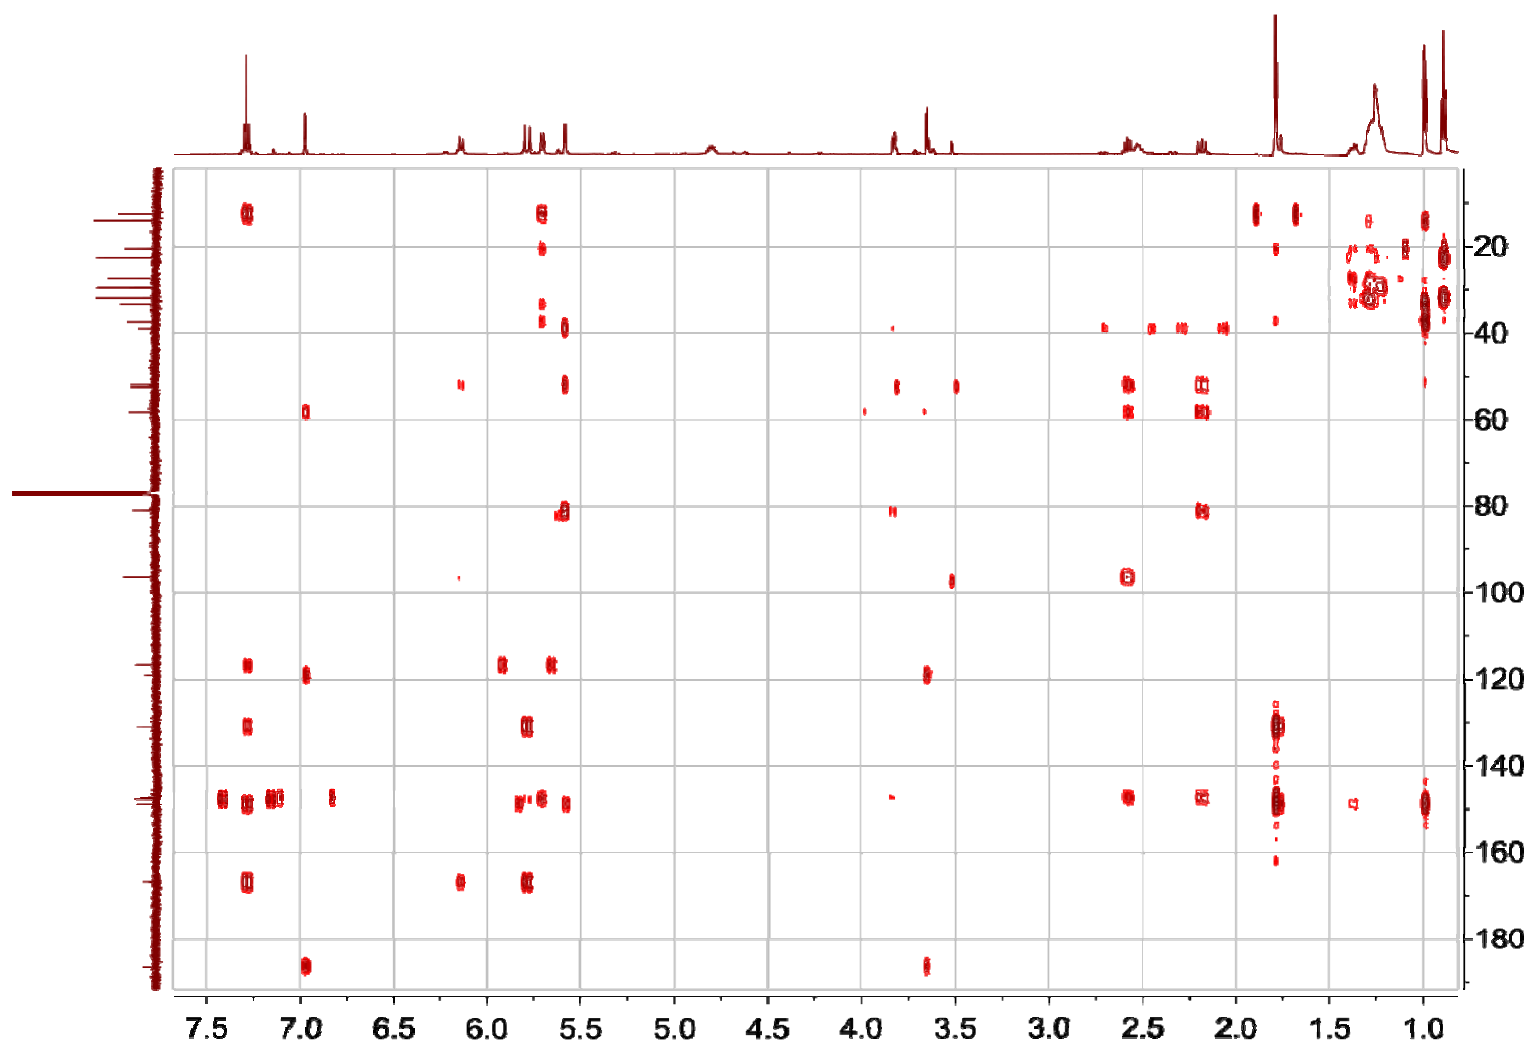

Figure S26. HMBC (600MHz, 150MHz, CDCl<sub>3</sub>) spectrum of compound 3.

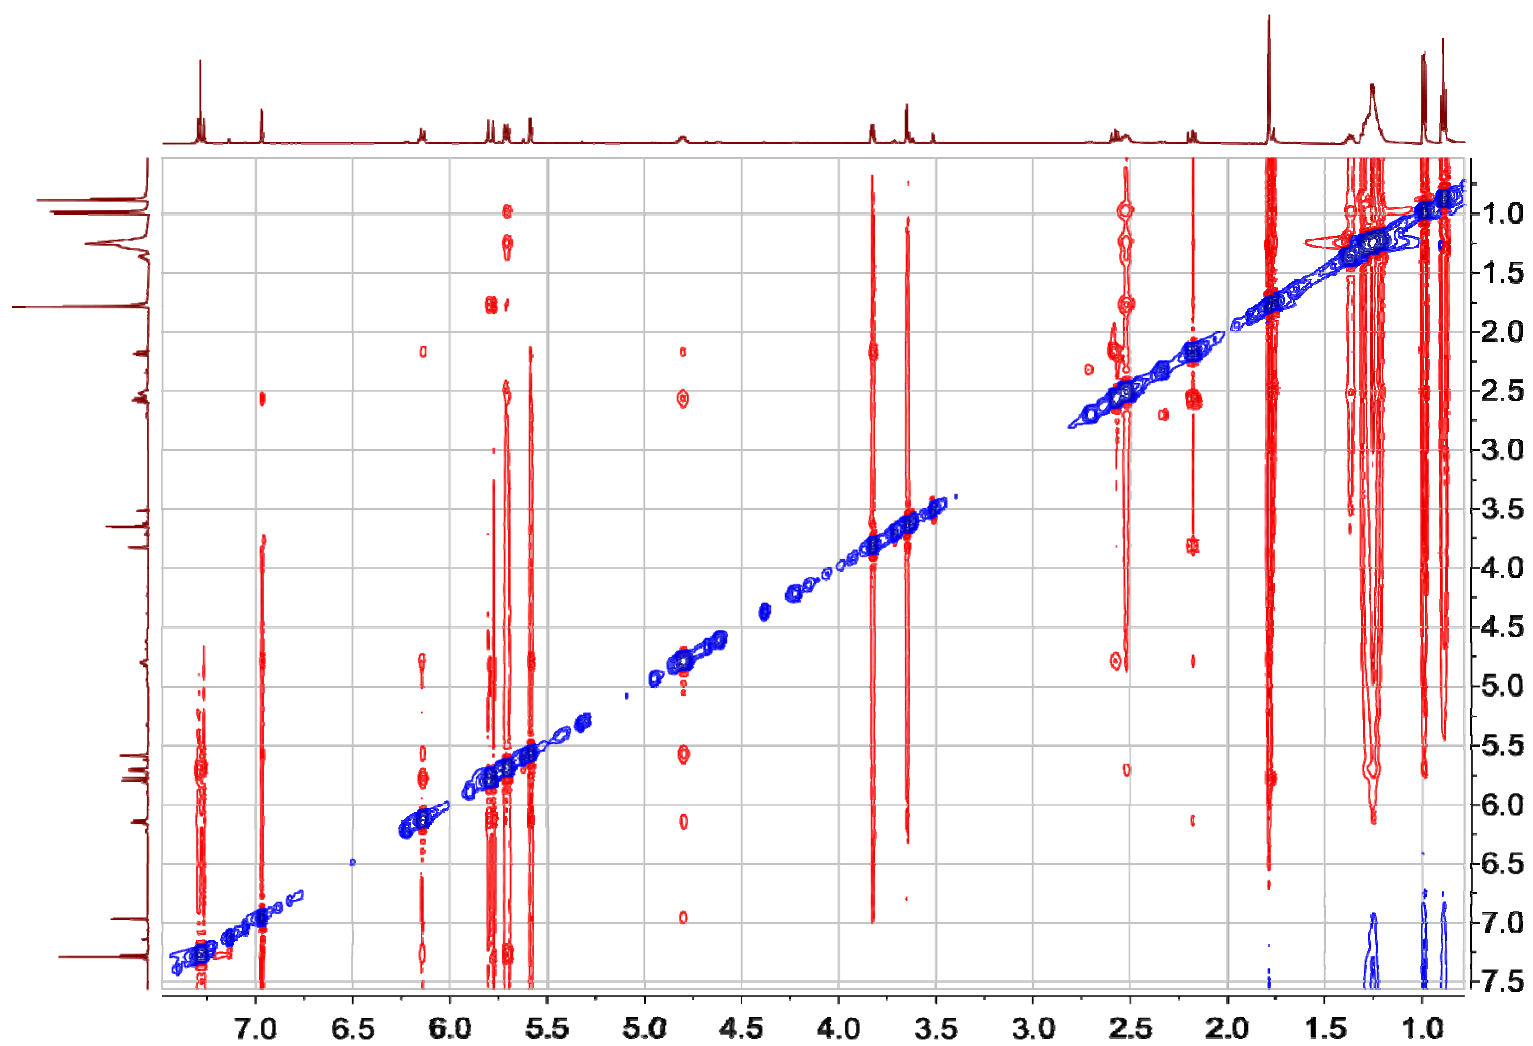

Figure S27. ROESY (600MHz, CDCl<sub>3</sub>) spectrum of compound 3.

## Mass Spectrum SmartFormula Report

### Analysis Info

Analysis Name D:\Data\Spektren 2015\Proksch15HR000325.d  
Method tune\_low.m  
Sample Name Hao Br-3-B-4-4 (CH3OH)  
Comment 1 ug/ml

Acquisition Date 9/21/2015 1:59:46 PM

Operator Peter Tommes  
Instrument maXis 288882.20213

### Acquisition Parameter

|             |            |                       |           |                  |           |
|-------------|------------|-----------------------|-----------|------------------|-----------|
| Source Type | ESI        | Ion Polarity          | Positive  | Set Nebulizer    | 0.3 Bar   |
| Focus       | Not active | Set Capillary         | 4000 V    | Set Dry Heater   | 180 °C    |
| Scan Begin  | 50 m/z     | Set End Plate Offset  | -500 V    | Set Dry Gas      | 4.0 l/min |
| Scan End    | 1500 m/z   | Set Collision Cell RF | 600.0 Vpp | Set Divert Valve | Source    |

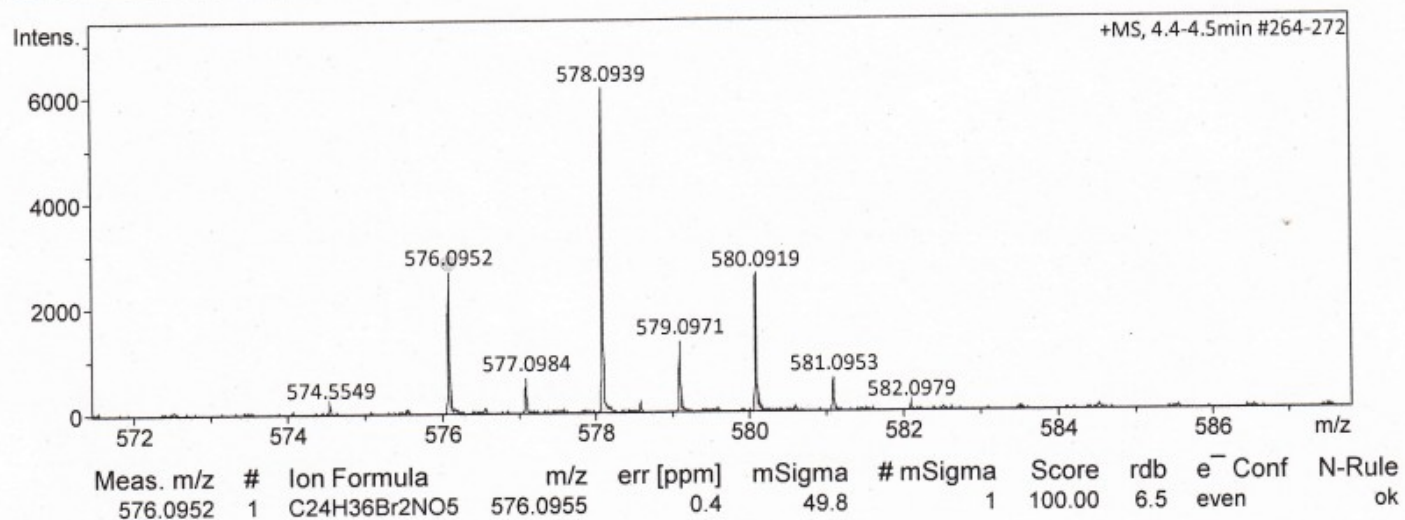

Figure S28. HRESIMS of compound 4.

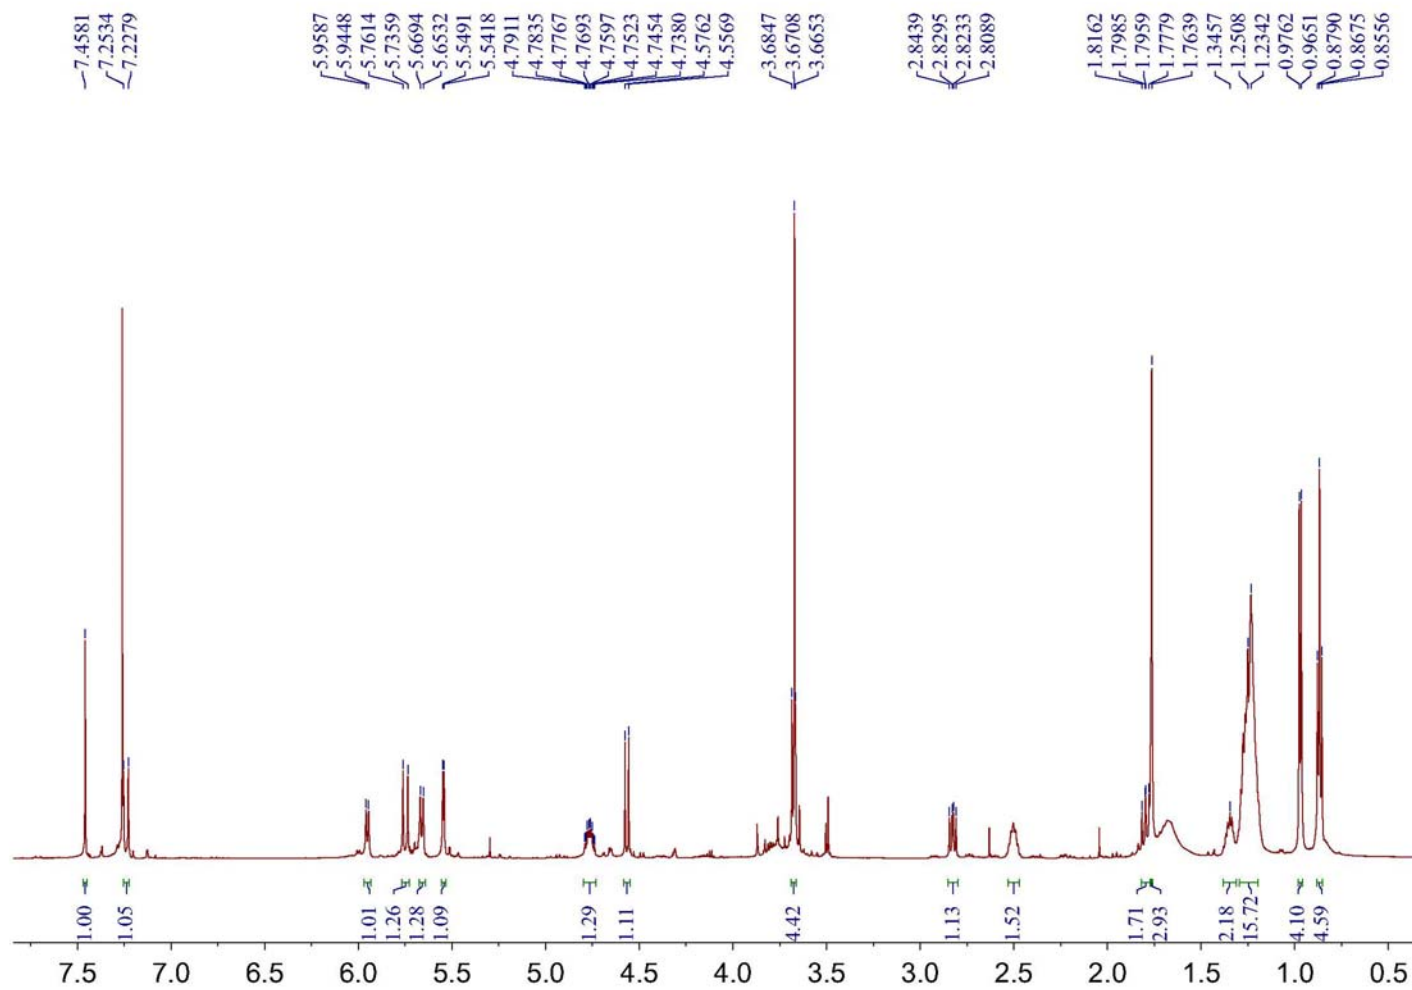

Figure S29.  $^1\text{H}$  NMR (600MHz,  $\text{CDCl}_3$ ) spectrum of compound 4.



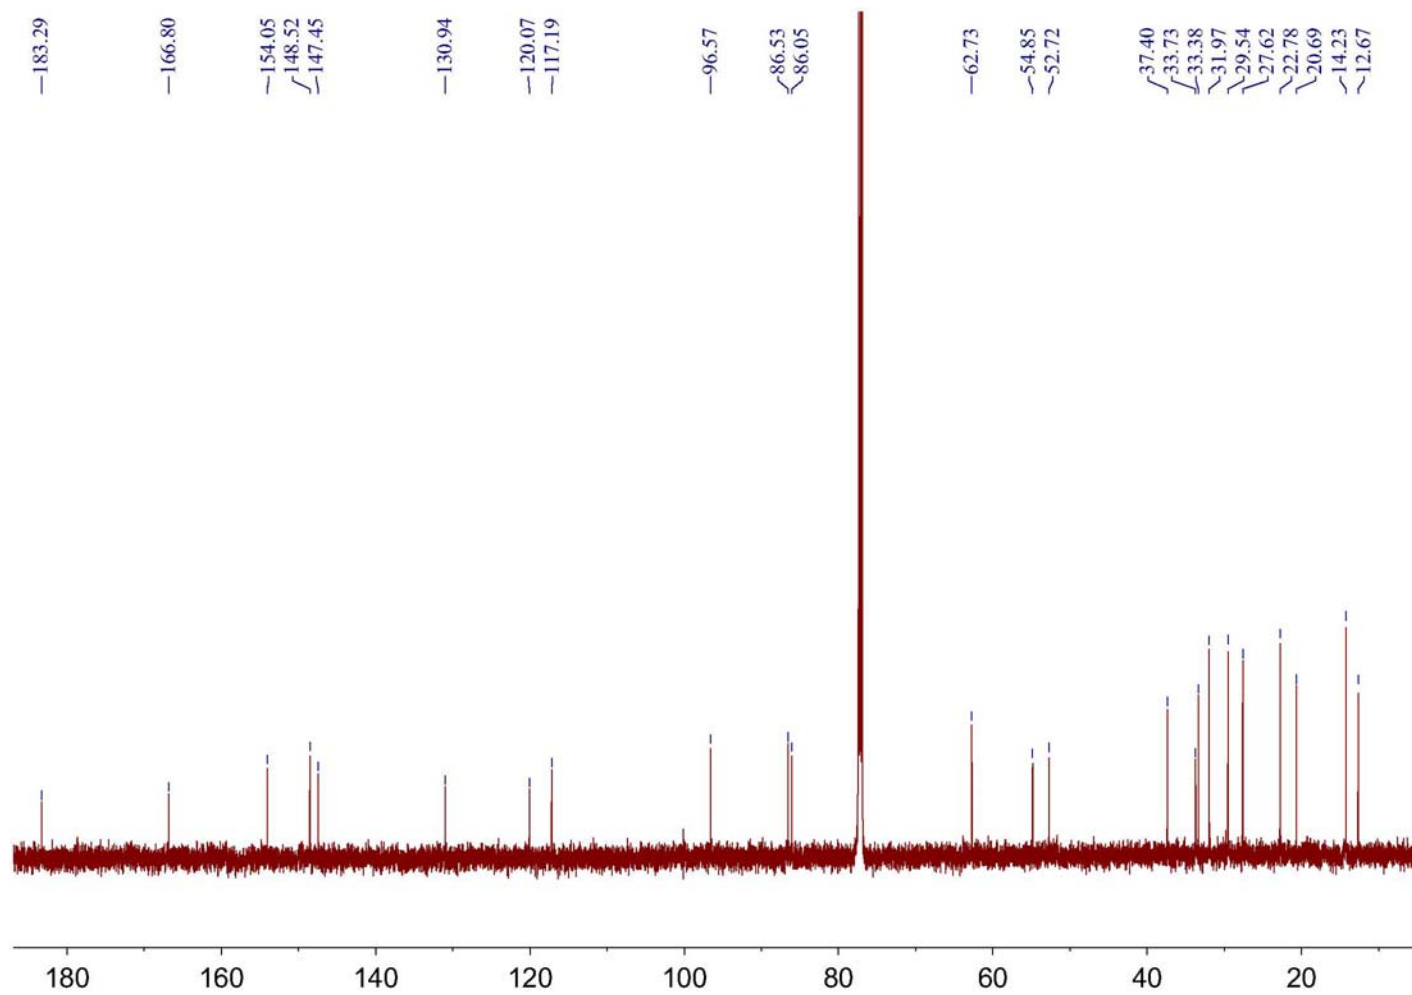

Figure S30. <sup>13</sup>C NMR (150MHz, CDCl<sub>3</sub>) spectrum of compound 4.

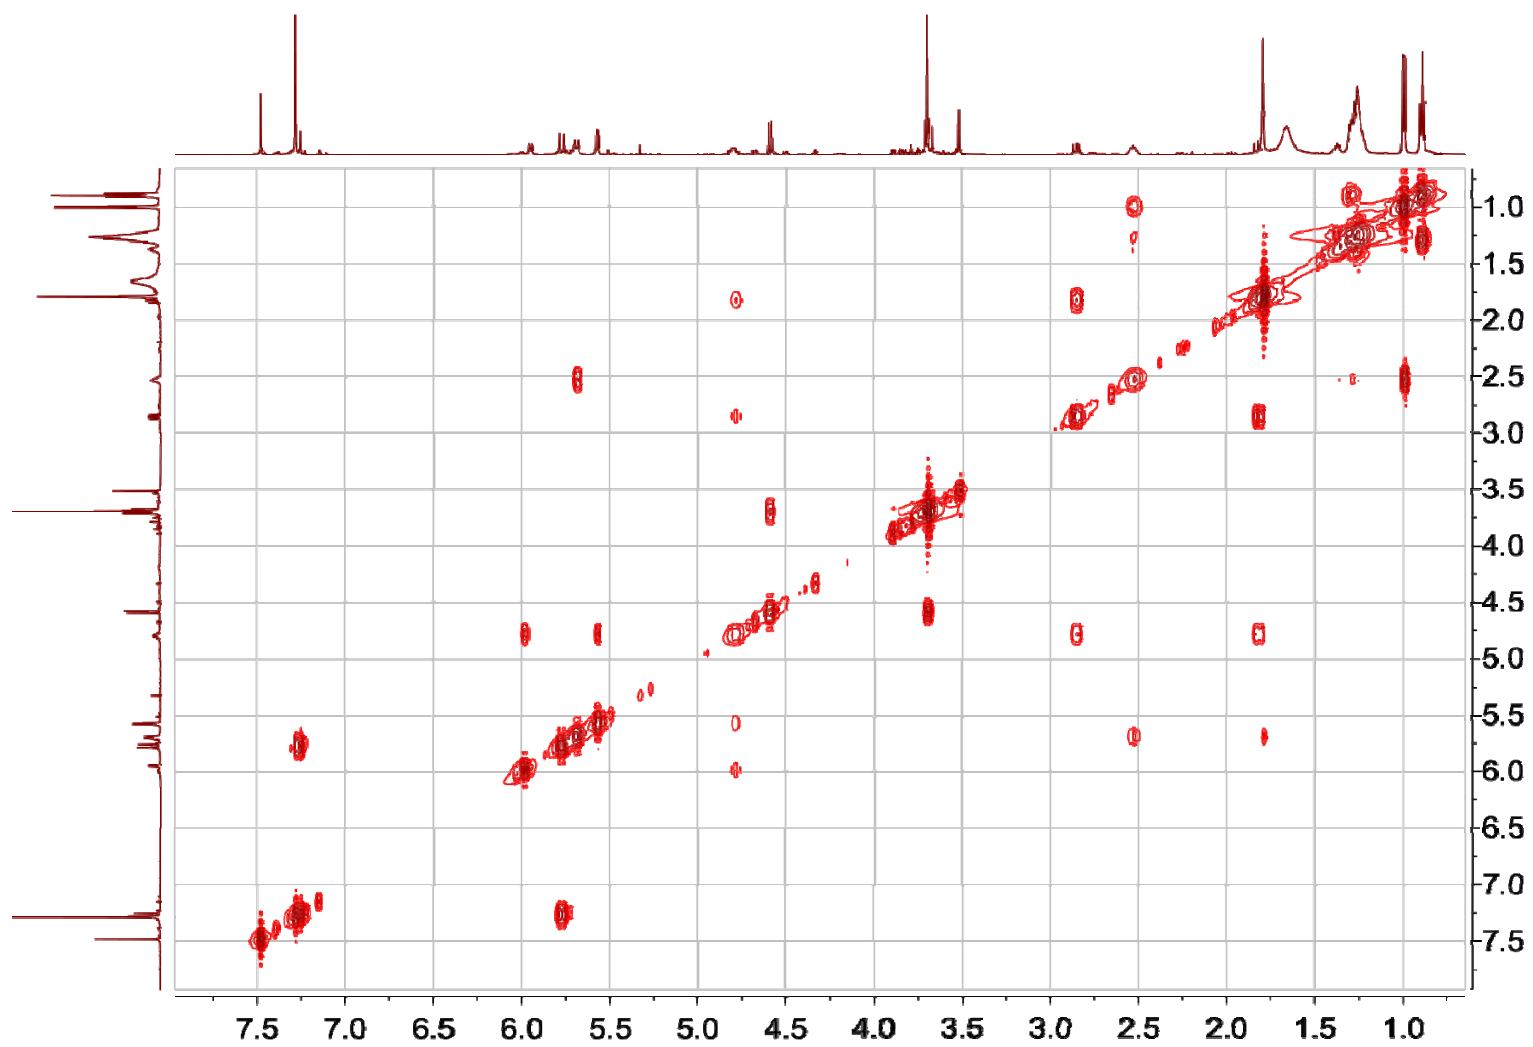

Figure S31.  $^1\text{H}$ - $^1\text{H}$  COSY (600MHz,  $\text{CDCl}_3$ ) spectrum of compound 4.

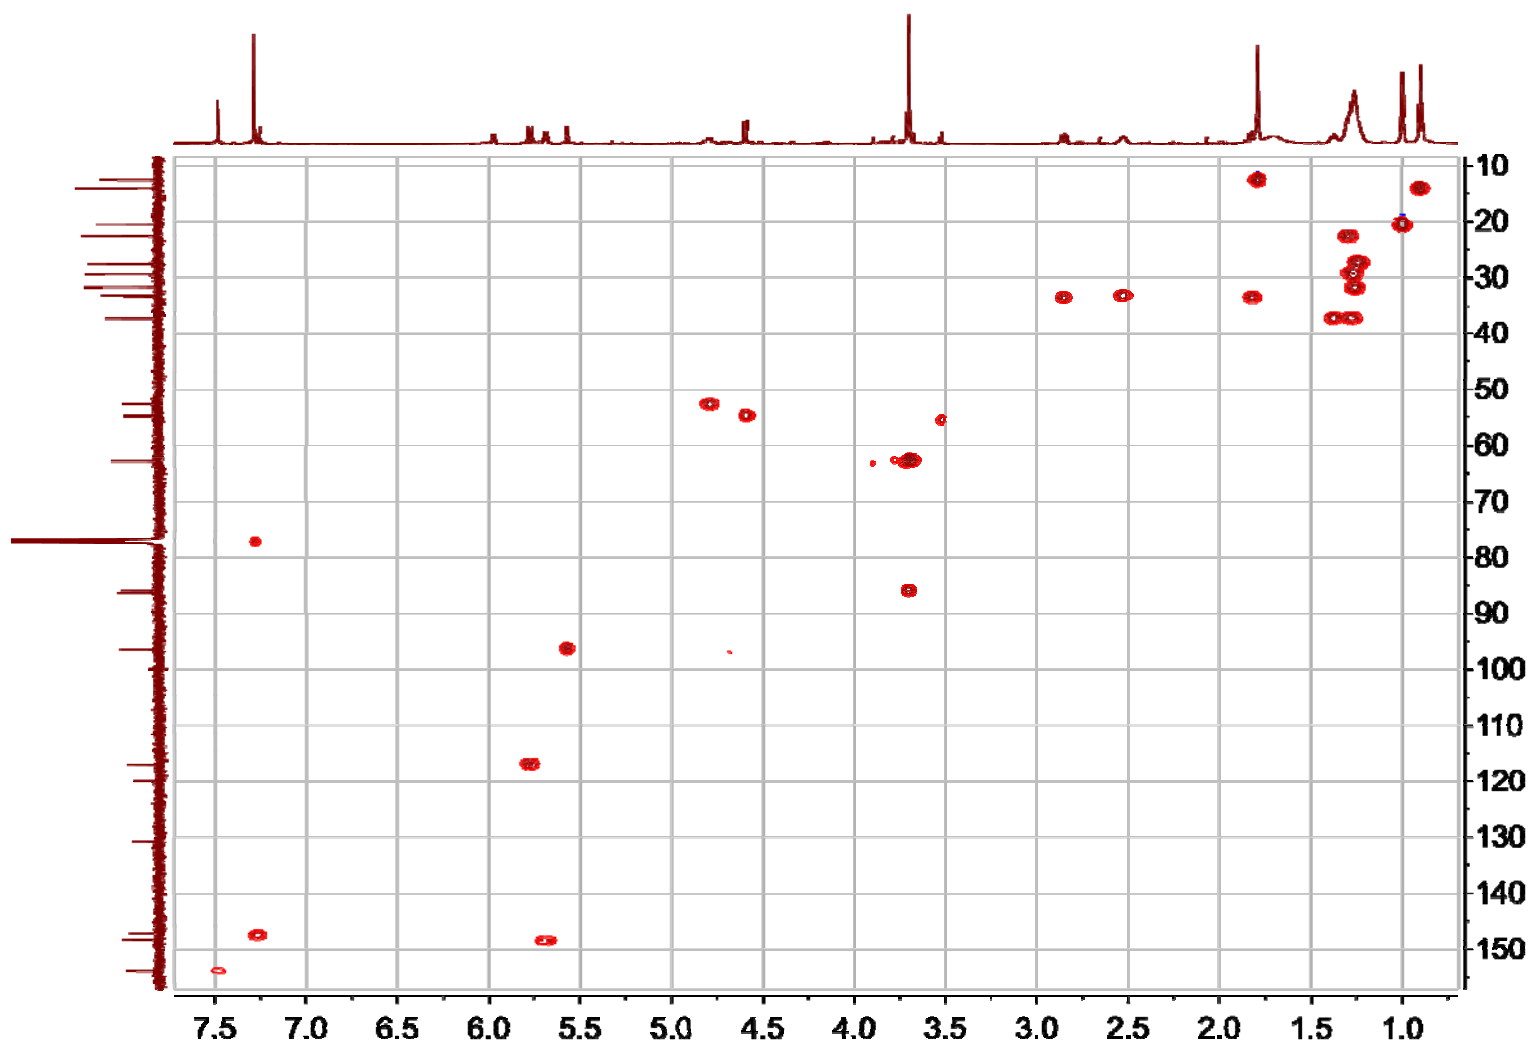

Figure S32. HSQC (600MHz, 150MHz, CDCl<sub>3</sub>) spectrum of compound 4.

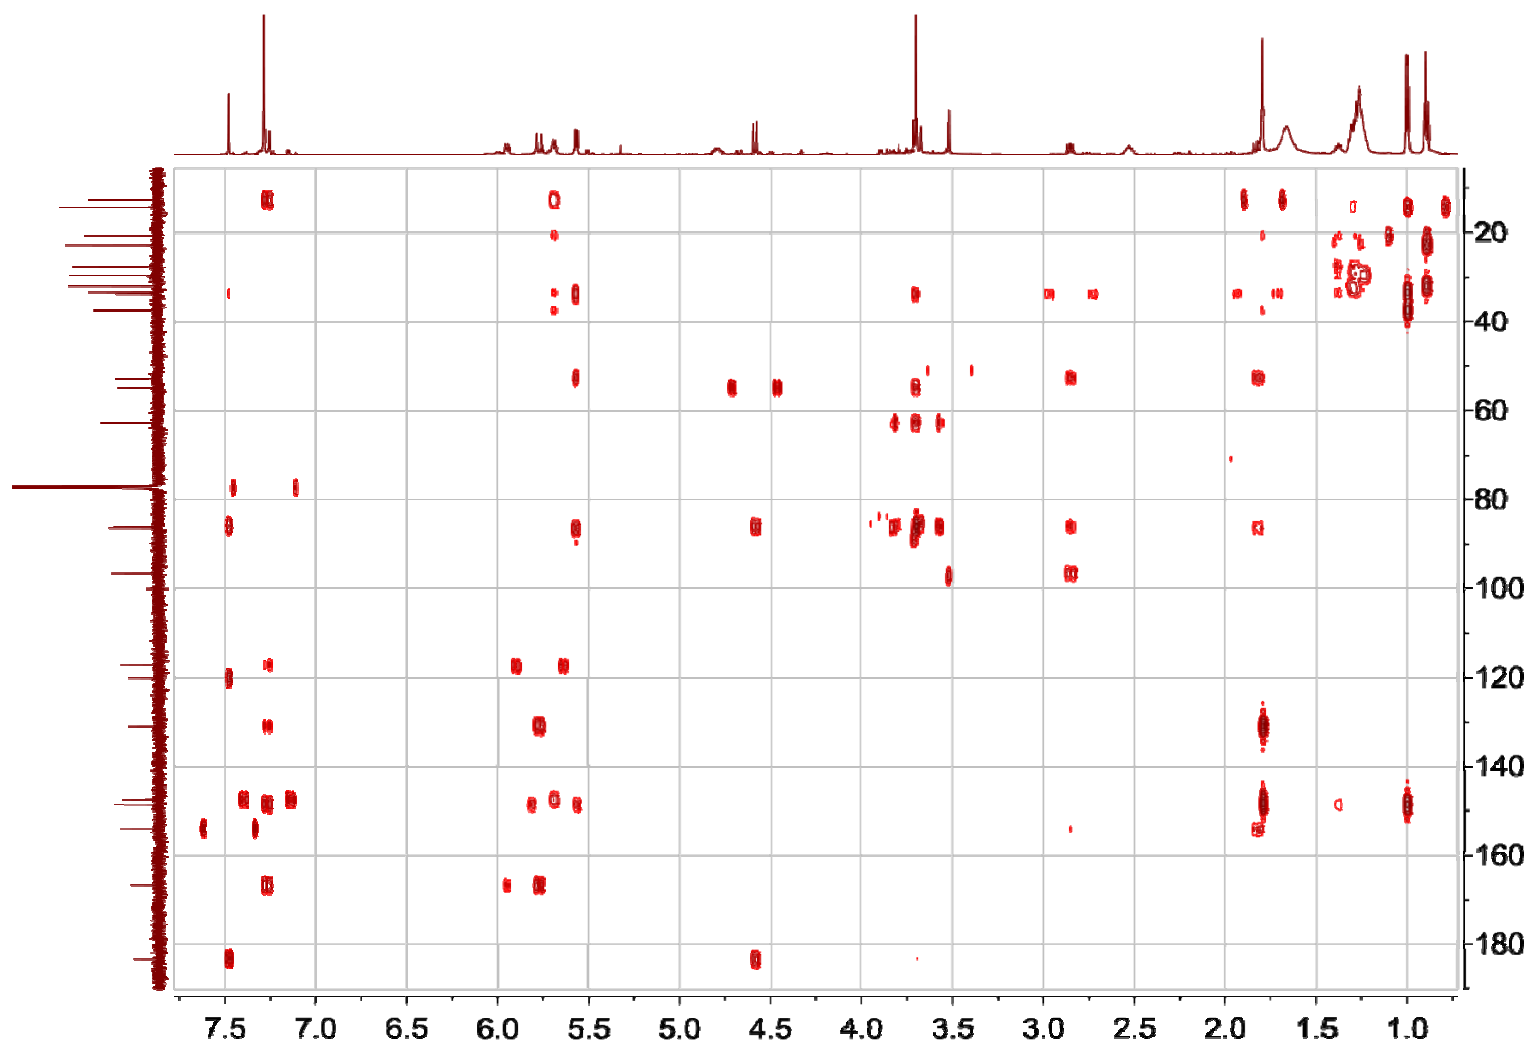

Figure S33. HMBC (600MHz, 150MHz,  $\text{CDCl}_3$ ) spectrum of compound 4.

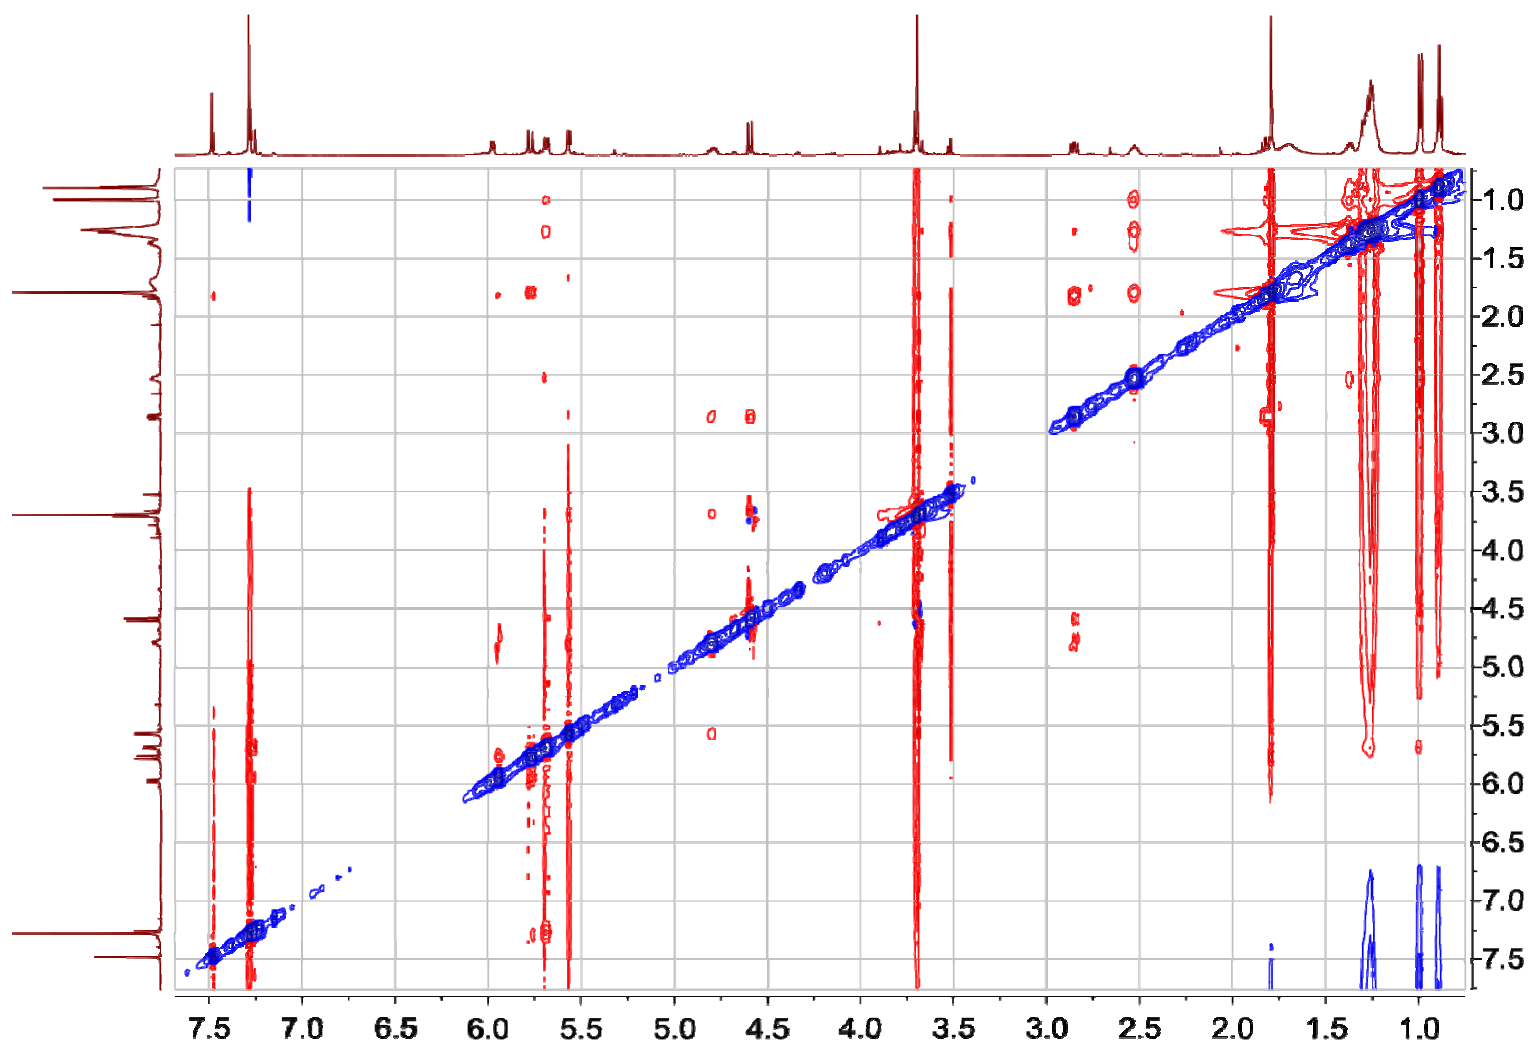

Figure S34. ROESY (600MHz, CDCl<sub>3</sub>) spectrum of compound 4.

## Mass Spectrum SmartFormula Report

### Analysis Info

Analysis Name D:\Data\Spektren 2015\Proksch15HR000385.d  
 Method tune\_low.m  
 Sample Name Hao Br-5-50-2-4 (CH3OH)  
 Comment 3 ul in 1000 ul

Acquisition Date 10/23/2015 11:00:06 AM

Operator Peter Tommes  
 Instrument maXis 288882.20213

### Acquisition Parameter

|             |            |                       |           |                  |           |
|-------------|------------|-----------------------|-----------|------------------|-----------|
| Source Type | ESI        | Ion Polarity          | Positive  | Set Nebulizer    | 0.3 Bar   |
| Focus       | Not active | Set Capillary         | 4000 V    | Set Dry Heater   | 180 °C    |
| Scan Begin  | 50 m/z     | Set End Plate Offset  | -500 V    | Set Dry Gas      | 4.0 l/min |
| Scan End    | 1500 m/z   | Set Collision Cell RF | 600.0 Vpp | Set Divert Valve | Source    |

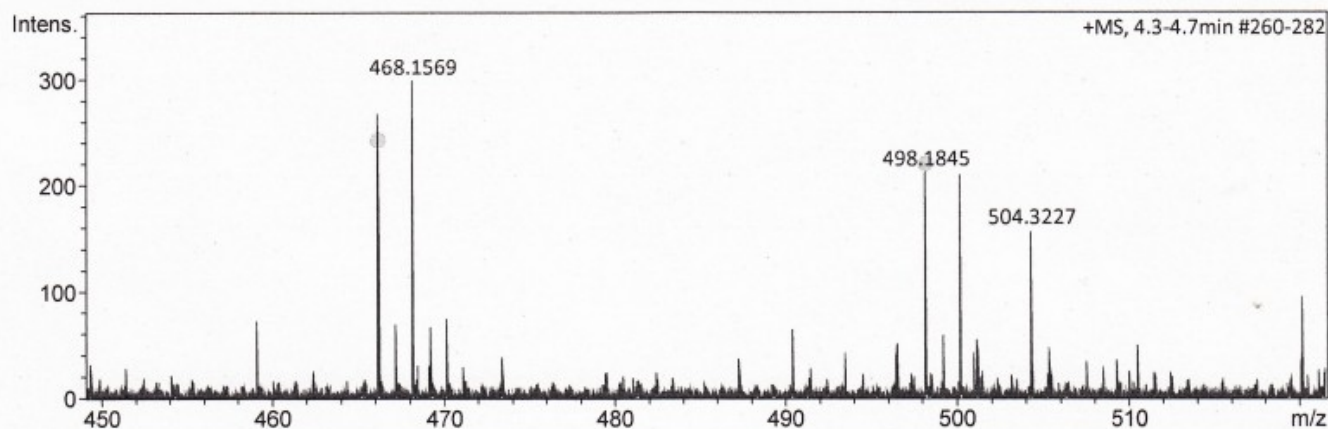

| Meas. m/z | # | Ion Formula | m/z      | err [ppm] | mSigma | # mSigma | Score  | rdb | e <sup>-</sup> Conf | N-Rule |
|-----------|---|-------------|----------|-----------|--------|----------|--------|-----|---------------------|--------|
| 466.1584  | 1 | C23H33BrNO4 | 466.1587 | 0.7       | 184.9  | 1        | 100.00 | 7.5 | even                | ok     |
| 498.1845  | 1 | C24H37BrNO5 | 498.1850 | 1.0       | 168.2  | 1        | 100.00 | 6.5 | even                | ok     |

Figure S35. HRESIMS of compound 5.

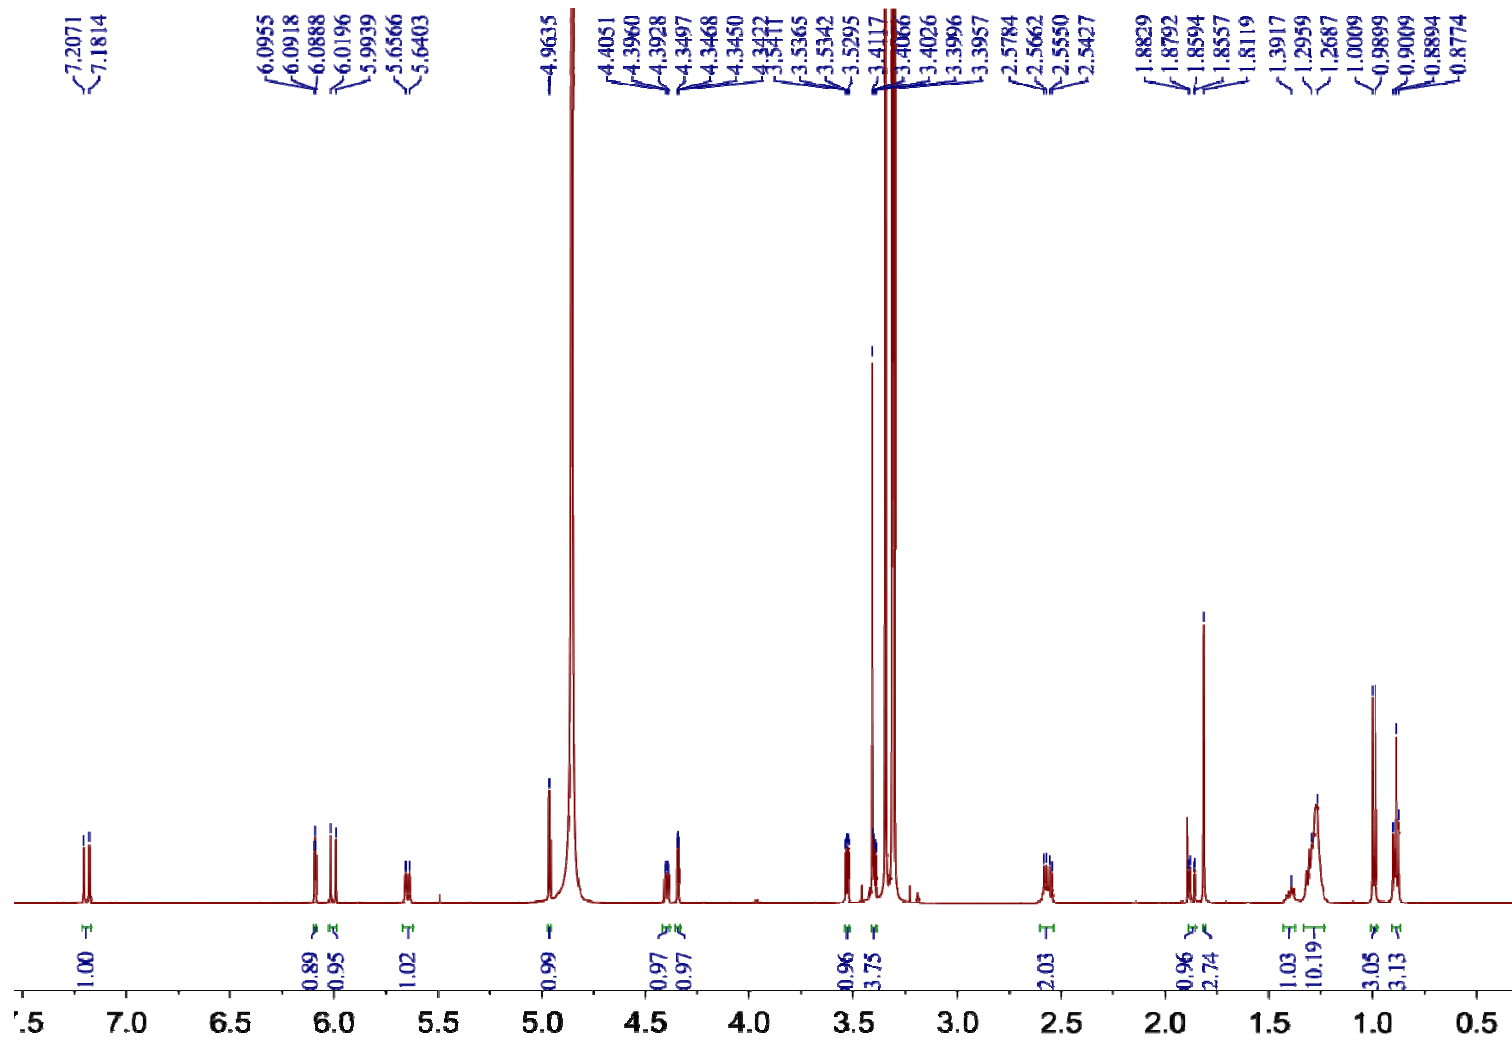

Figure S36.  $^1\text{H}$  NMR (600MHz, methanol- $d_4$ ) spectrum of compound 5.

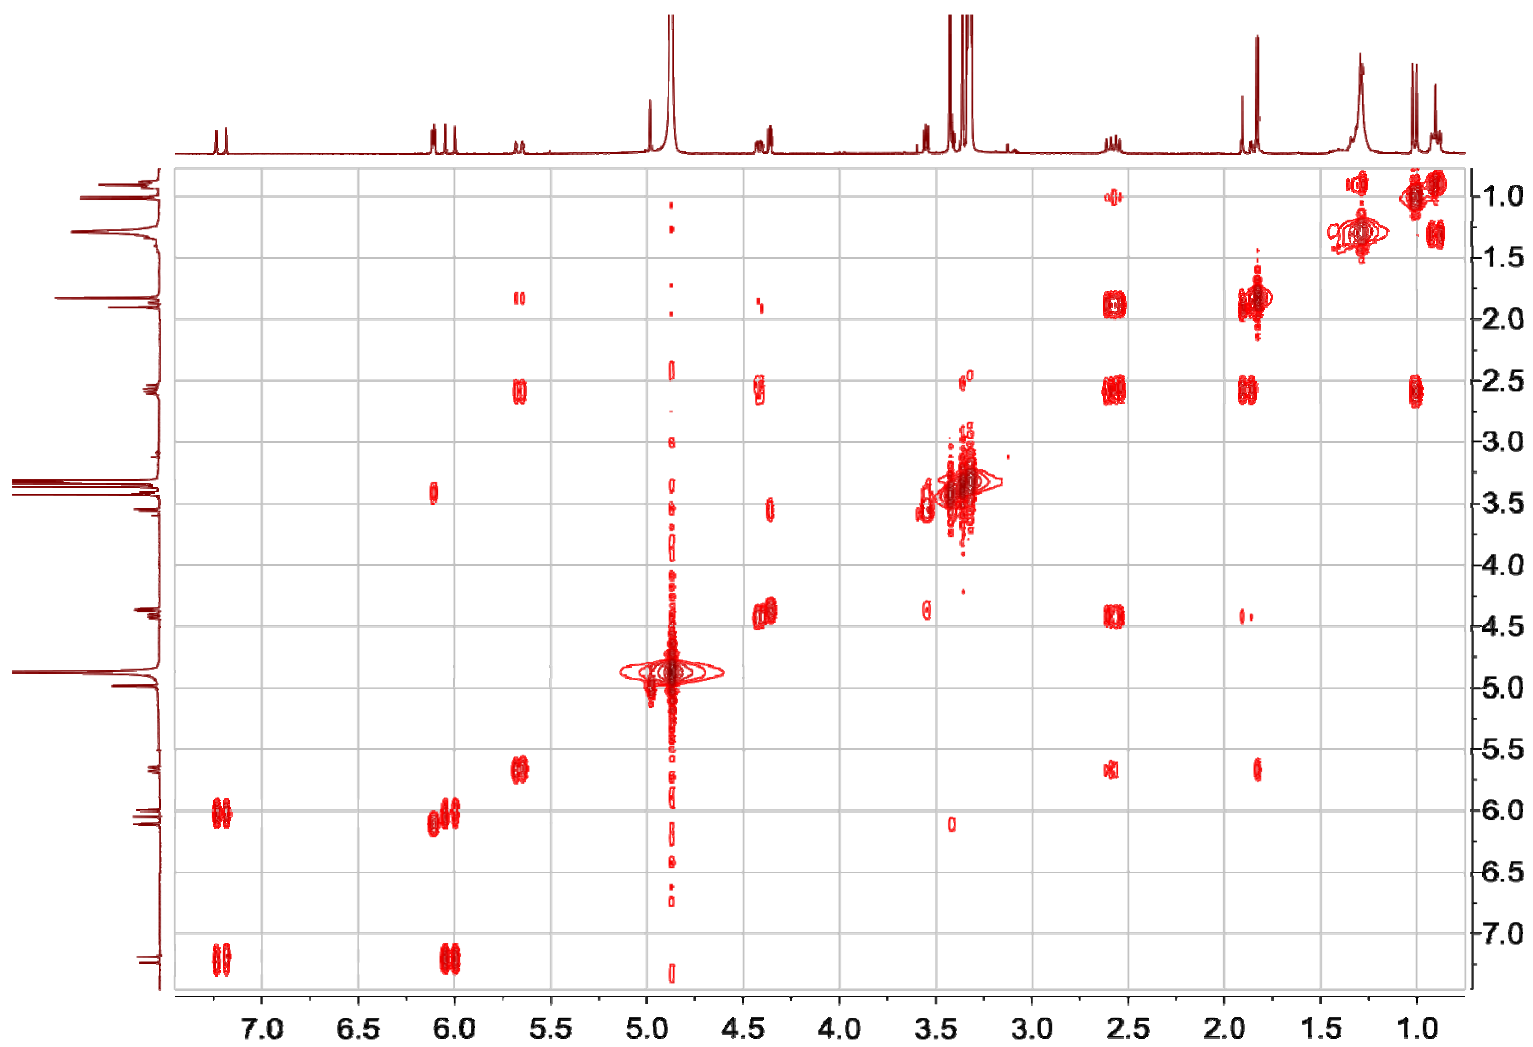

Figure S37.  $^1\text{H}$ - $^1\text{H}$  COSY (300MHz, methanol- $d_4$ ) spectrum of compound 5.



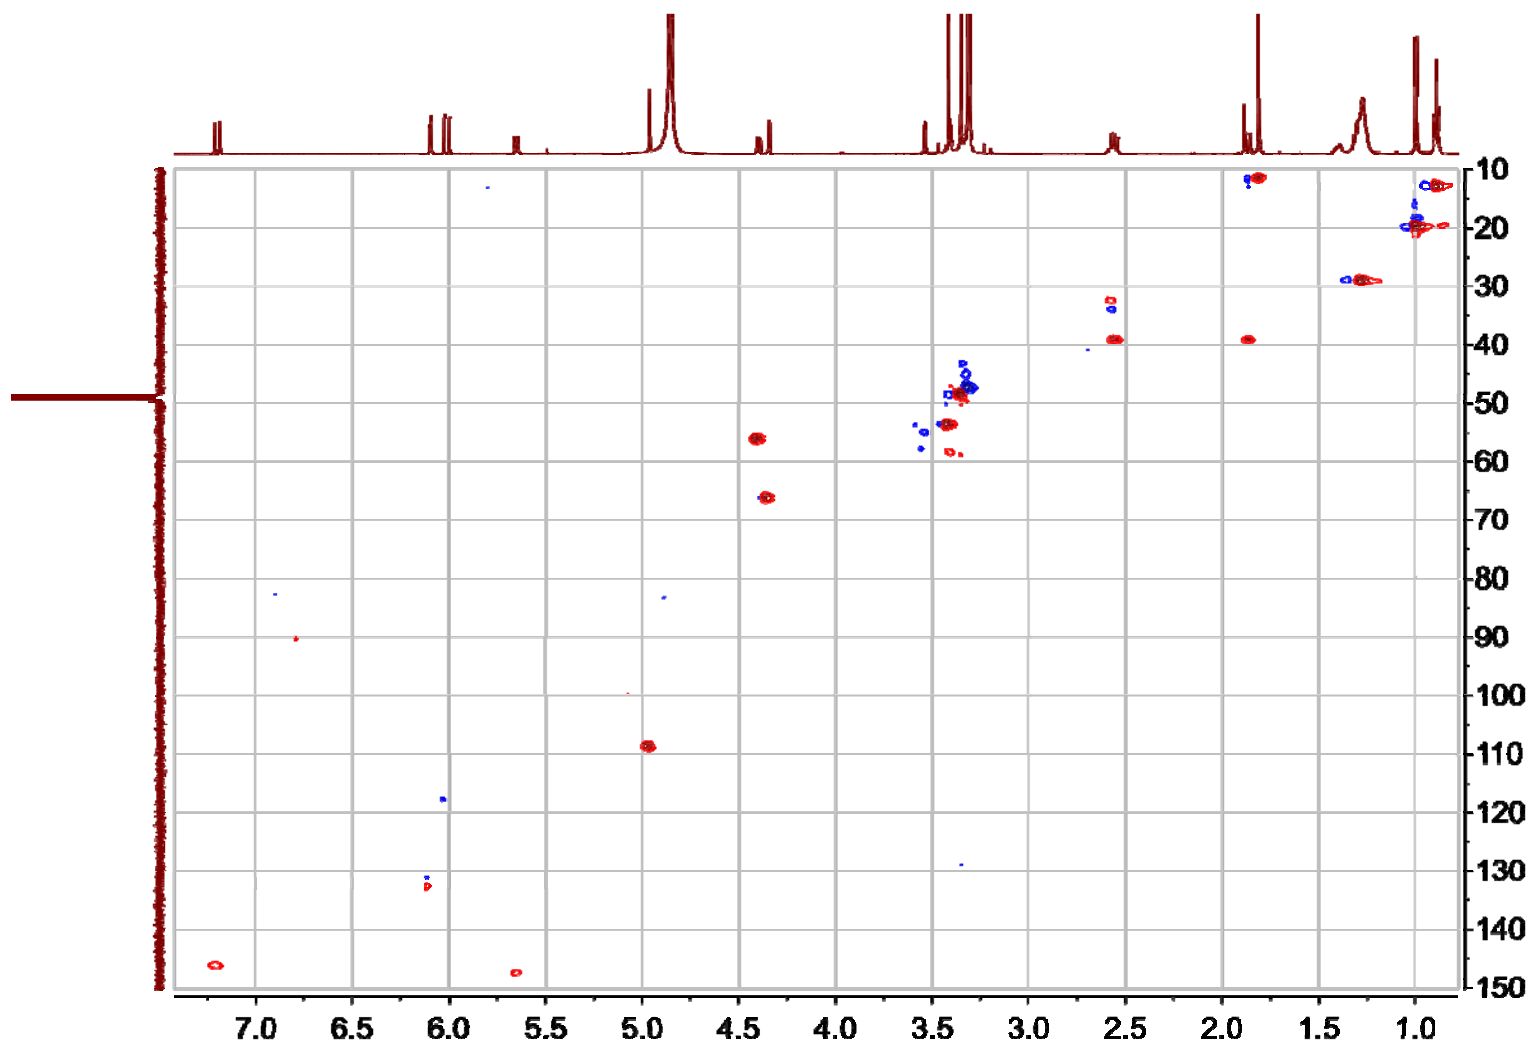

Figure S38. HSQC (600MHz, 150MHz, methanol- $d_4$ ) spectrum of compound 5.

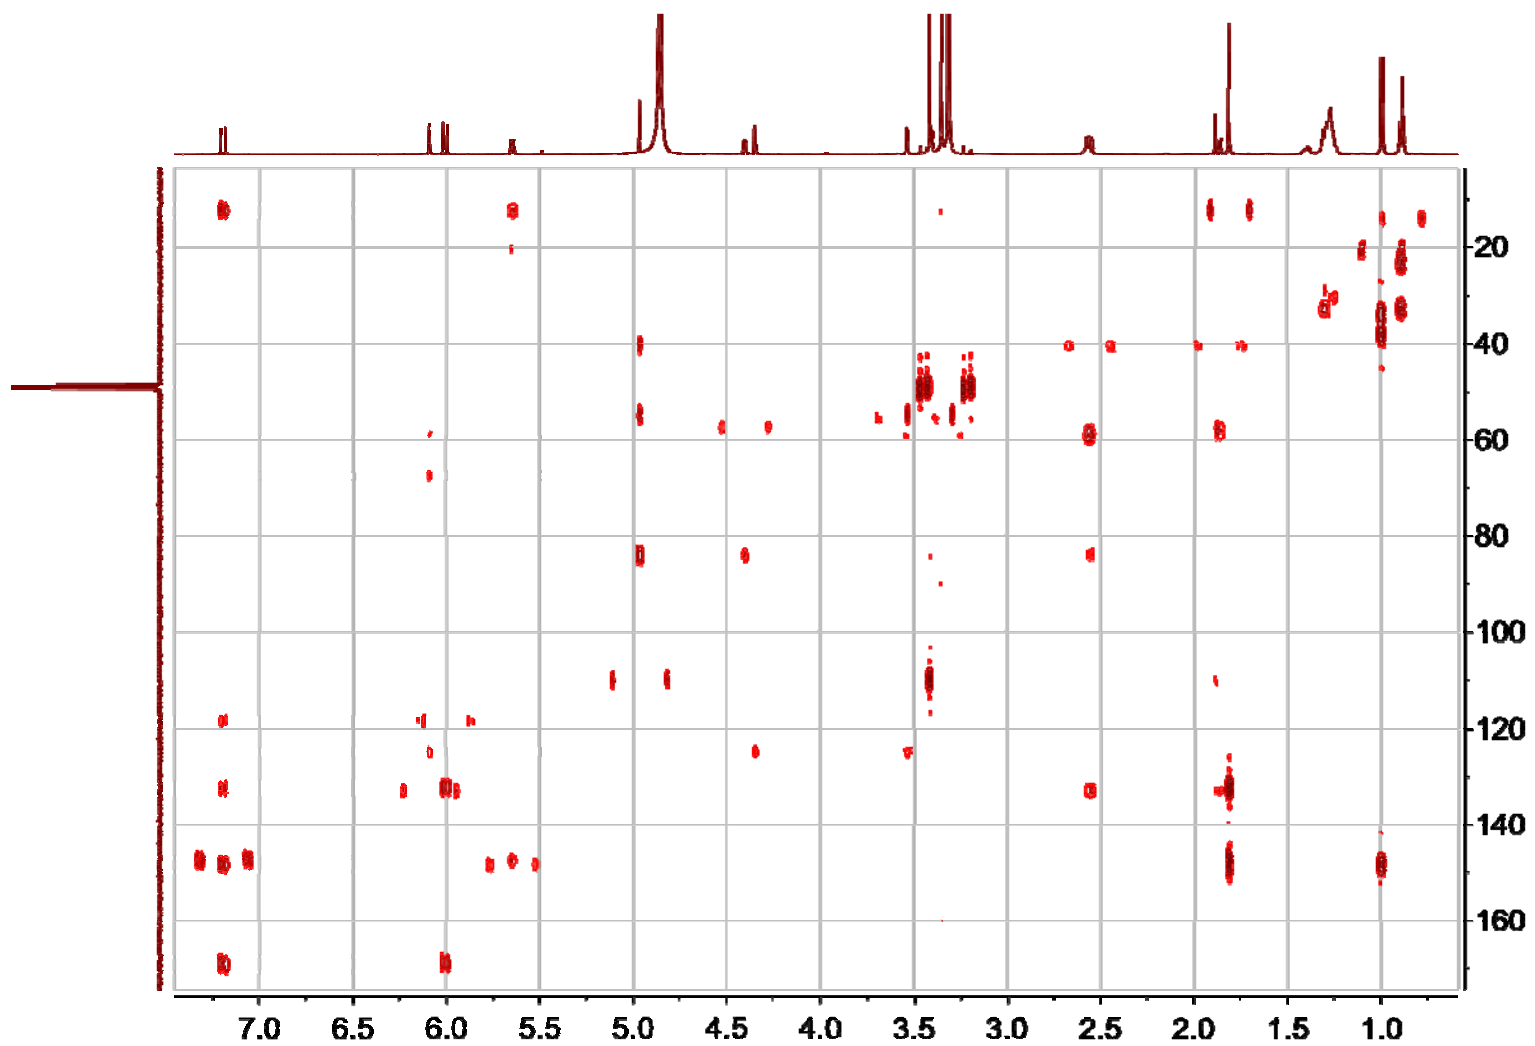

Figure S39. HMBC (600MHz, 150MHz, methanol- $d_4$ ) spectrum of compound 5.

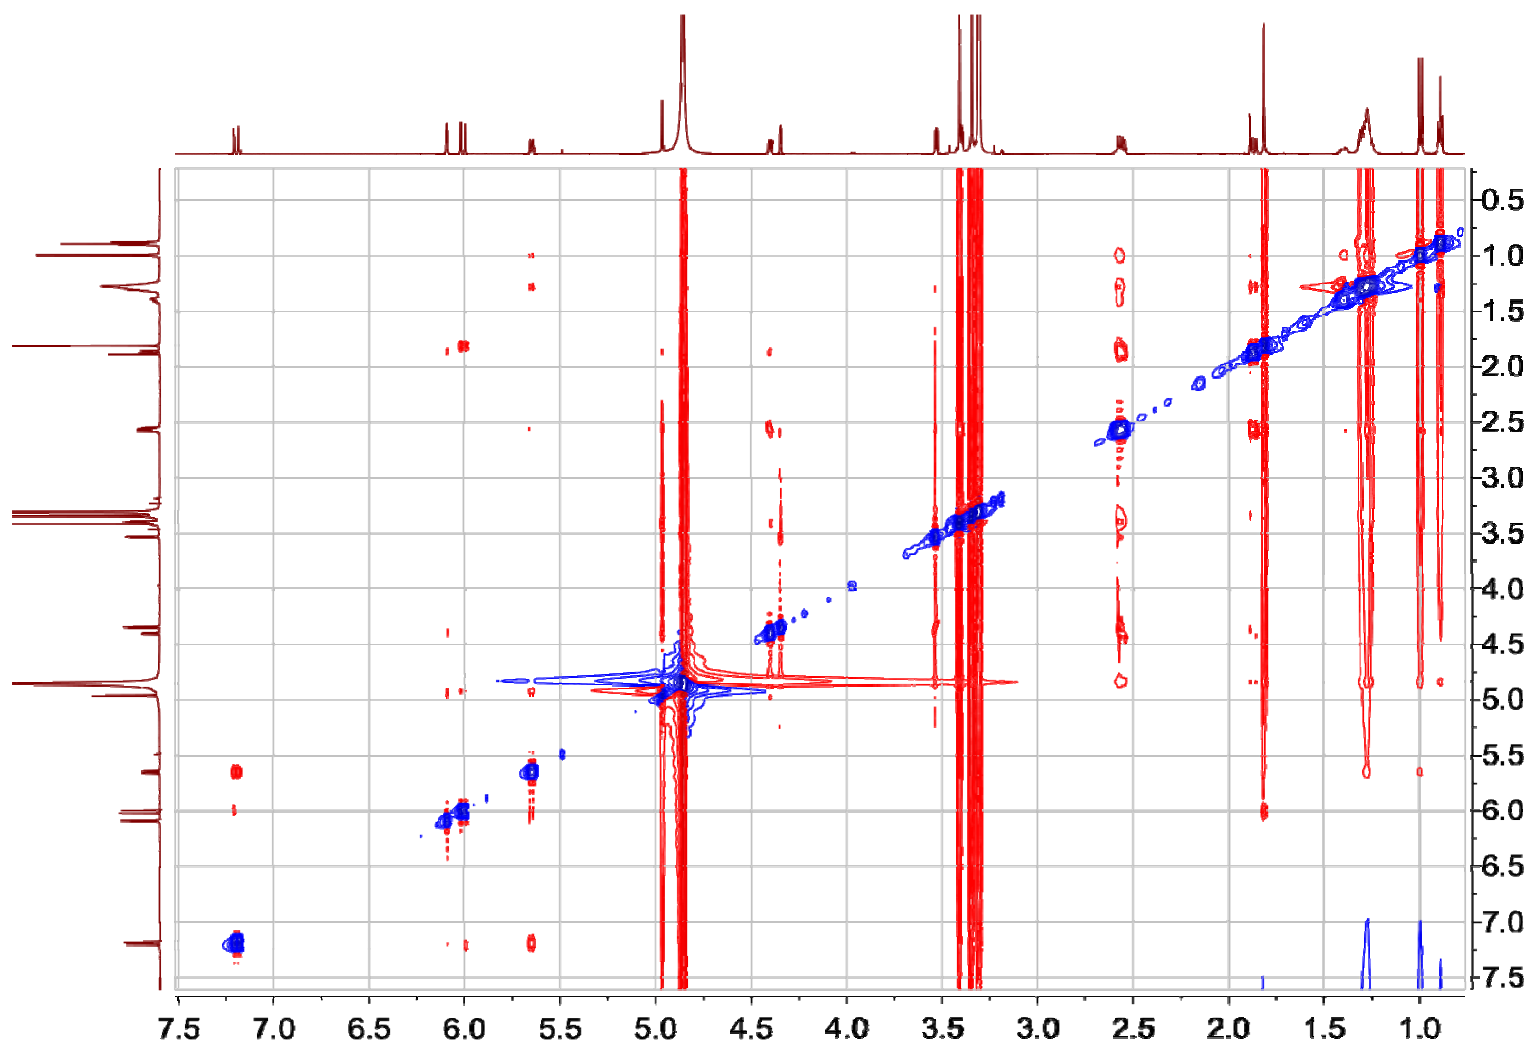

Figure S40. ROESY (600MHz, methanol- $d_4$ ) spectrum of compound 5.

## Mass Spectrum SmartFormula Report

### Analysis Info

Analysis Name D:\Data\Spektren 2015\Proksch15HR000383.d  
Method tune\_low.m  
Sample Name Hao Br-5-50-2-1 (CH3OH)  
Comment 10 ul in 1000 ul

Acquisition Date 10/22/2015 2:43:55 PM

Operator Peter Tommes  
Instrument maXis 288882.20213

### Acquisition Parameter

|             |            |                       |           |                  |           |
|-------------|------------|-----------------------|-----------|------------------|-----------|
| Source Type | ESI        | Ion Polarity          | Positive  | Set Nebulizer    | 0.3 Bar   |
| Focus       | Not active | Set Capillary         | 4000 V    | Set Dry Heater   | 180 °C    |
| Scan Begin  | 50 m/z     | Set End Plate Offset  | -500 V    | Set Dry Gas      | 4.0 l/min |
| Scan End    | 1500 m/z   | Set Collision Cell RF | 600.0 Vpp | Set Divert Valve | Source    |

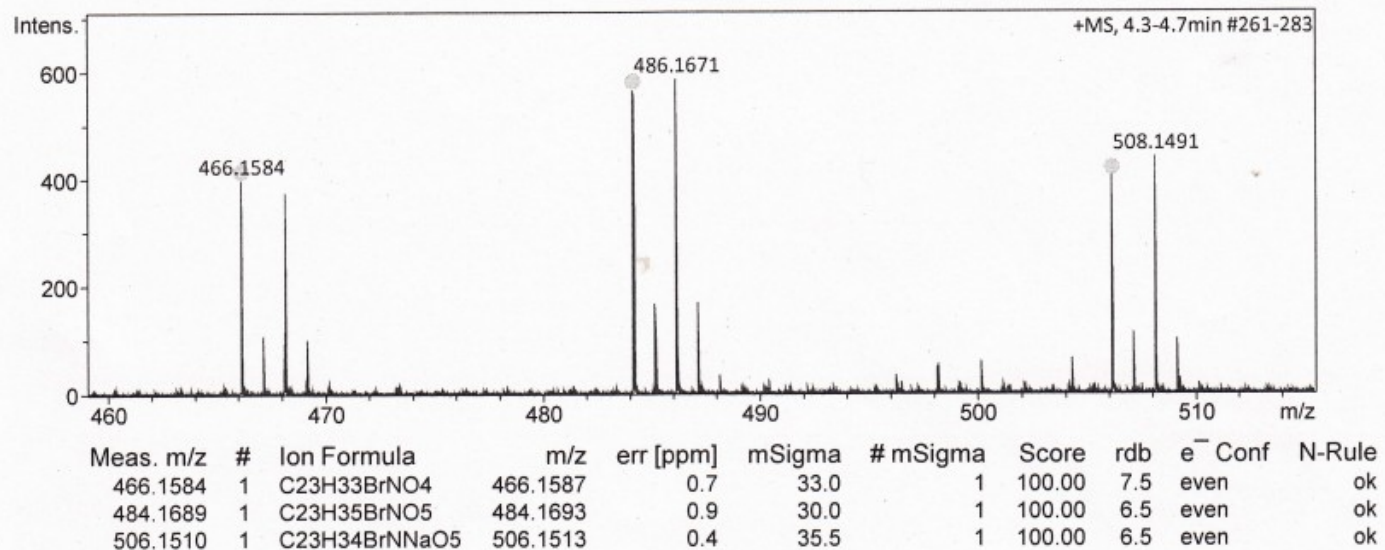

Figure S41. HRESIMS of compound 6.

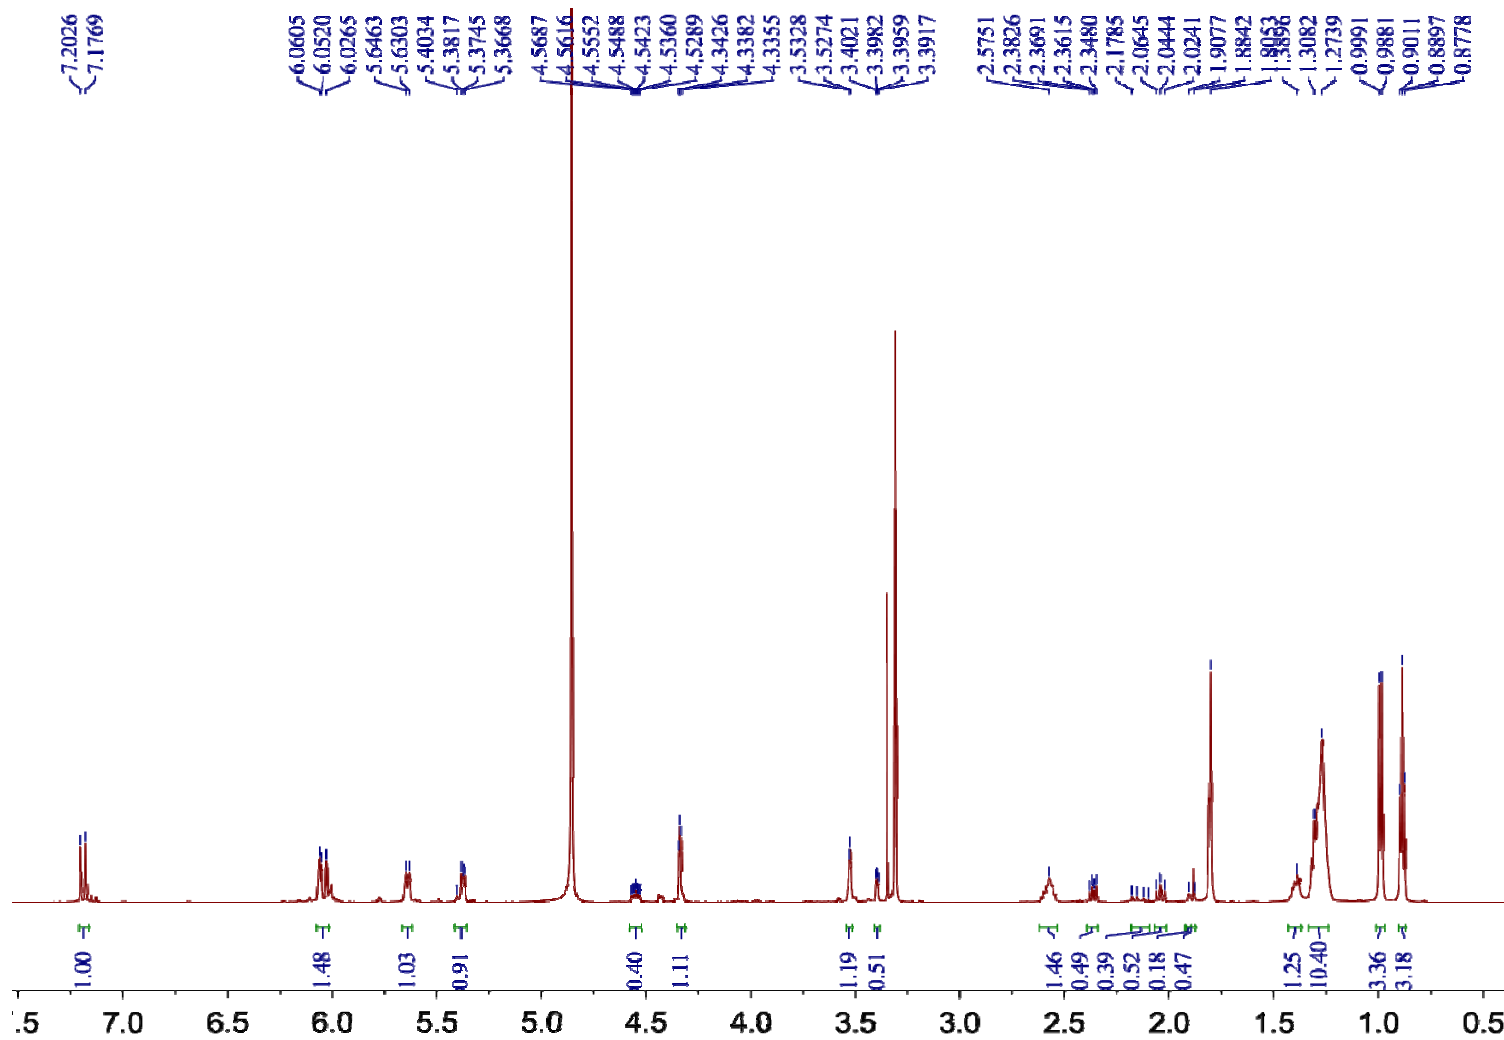

Figure S42.  $^1\text{H}$  NMR (600MHz, methanol- $d_4$ ) spectrum of compound 6.

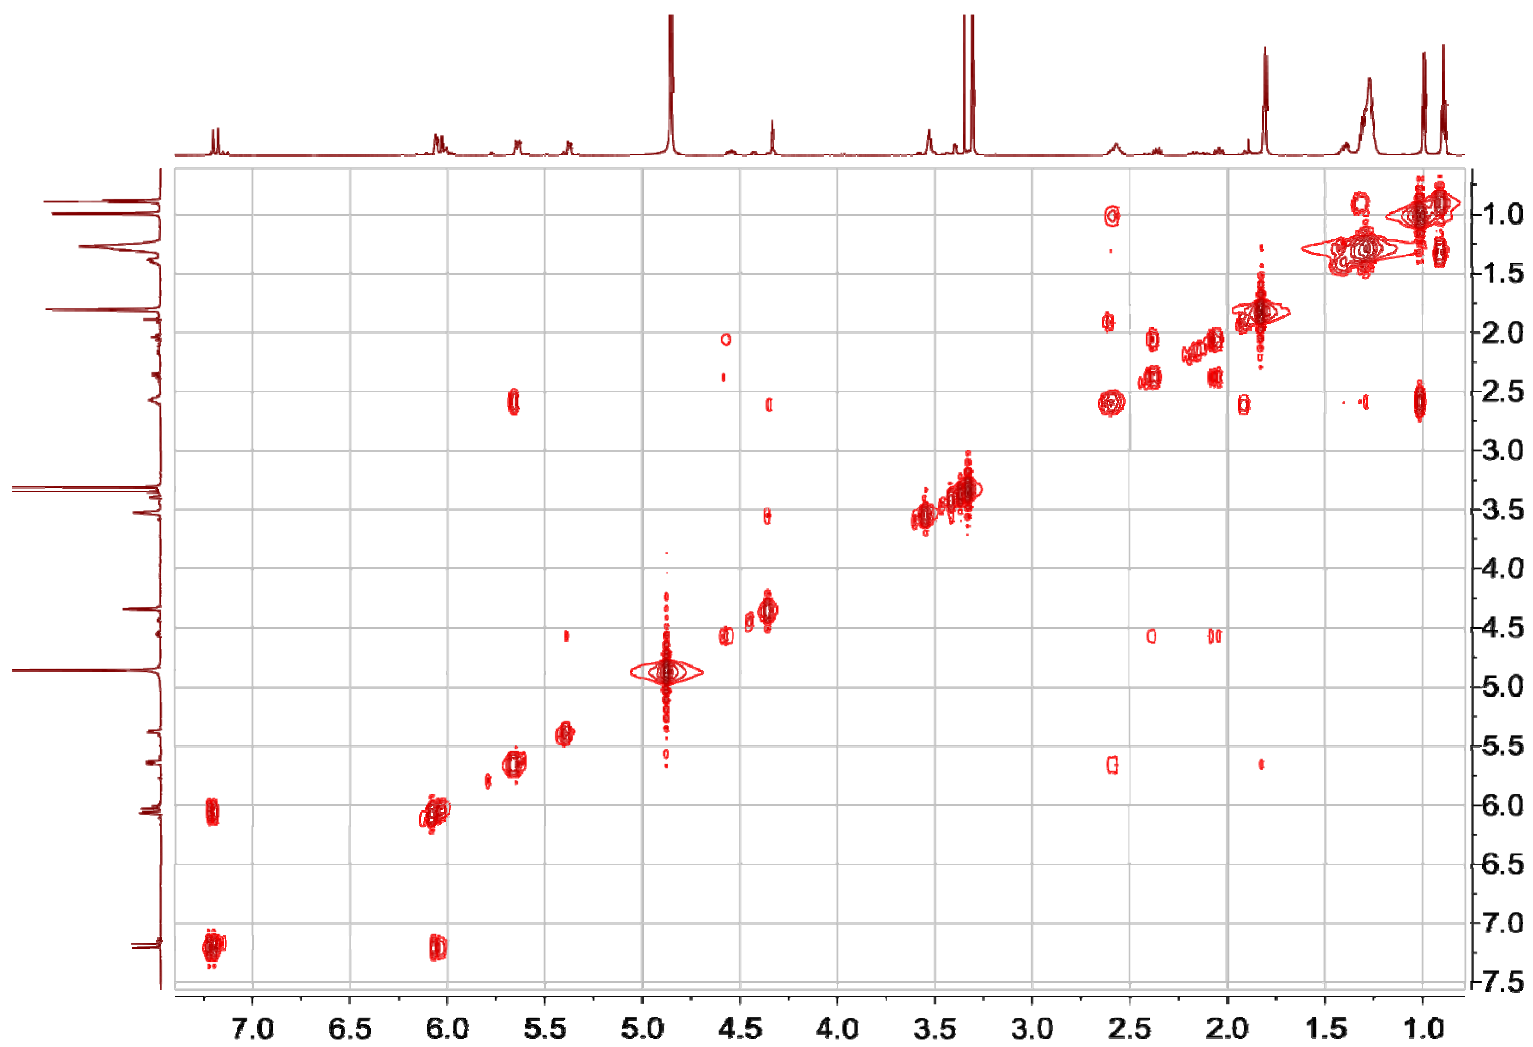

Figure S43.  $^1\text{H}$ - $^1\text{H}$  COSY (600MHz, methanol- $d_4$ ) spectrum of compound 6.

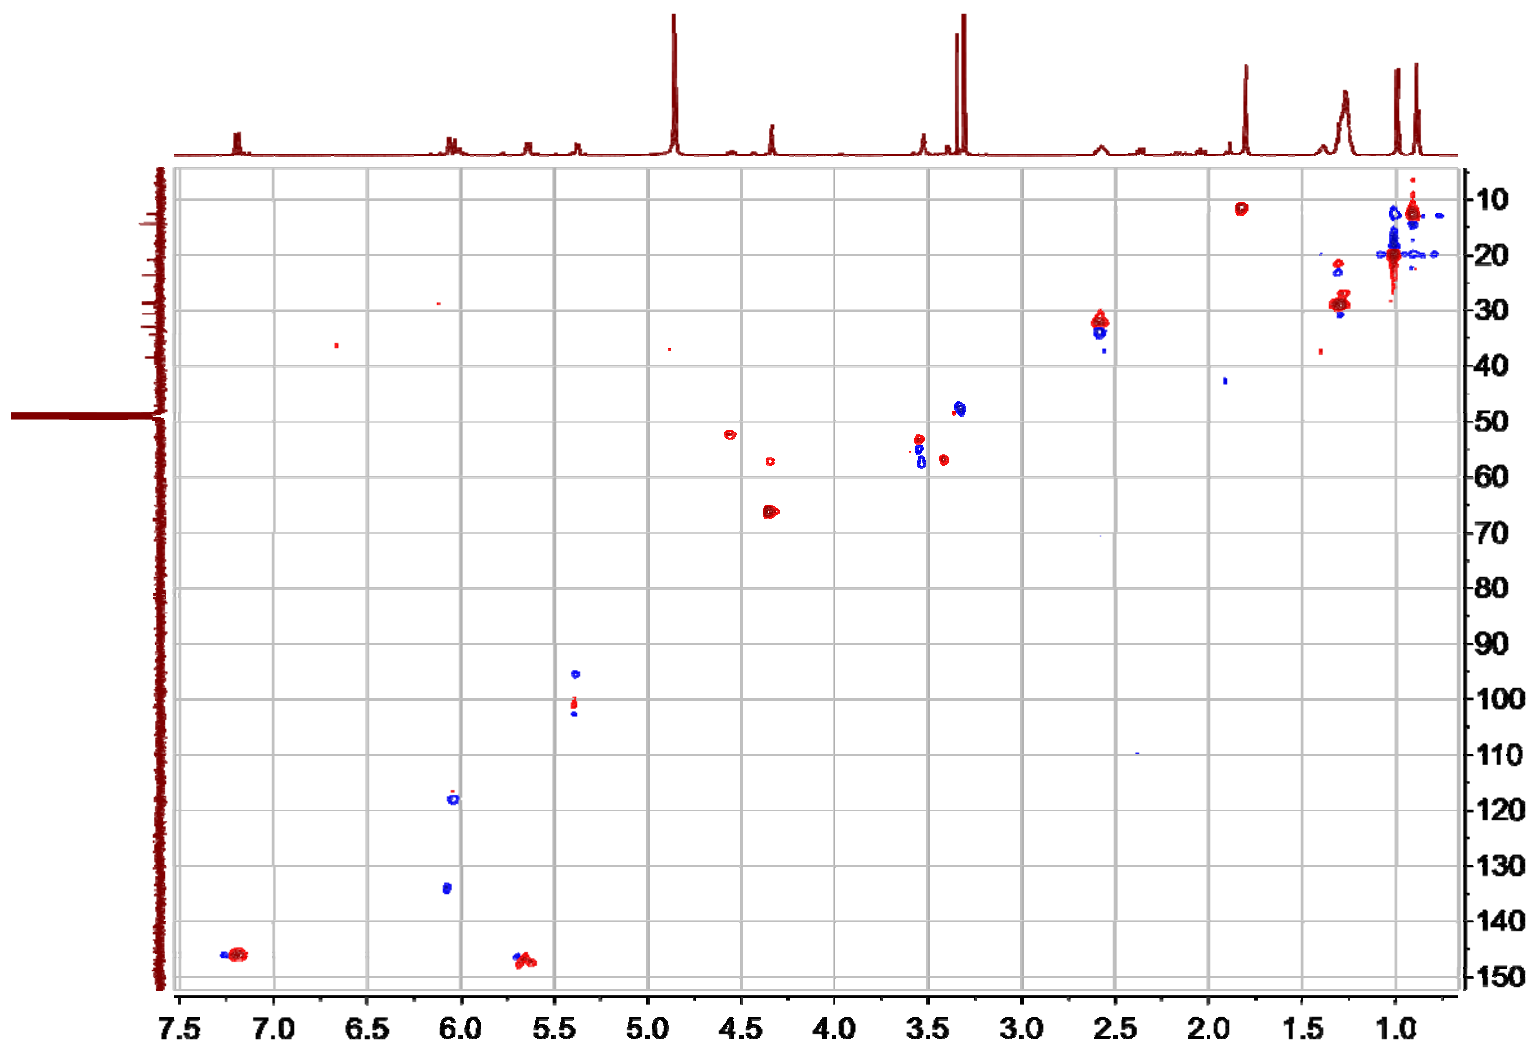

Figure S44. HSQC (600MHz, 150MHz, methanol-*d*<sub>4</sub>) spectrum of compound 6.

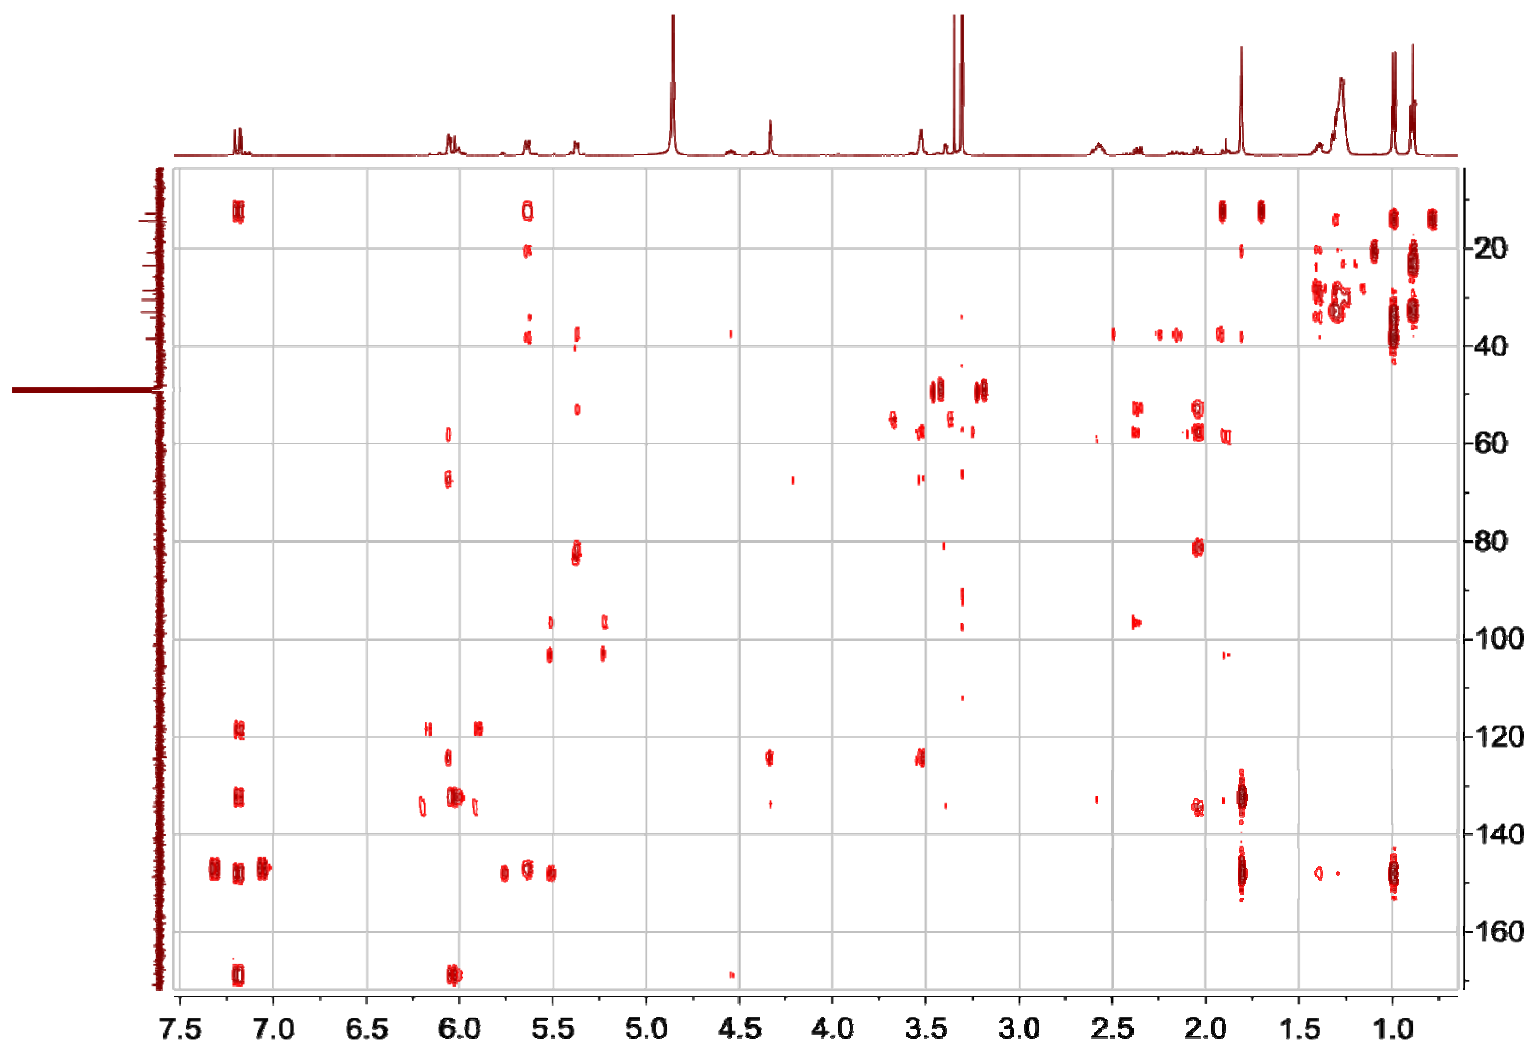

Figure S45. HMBC (600MHz, 150MHz, methanol- $d_4$ ) spectrum of compound 6.



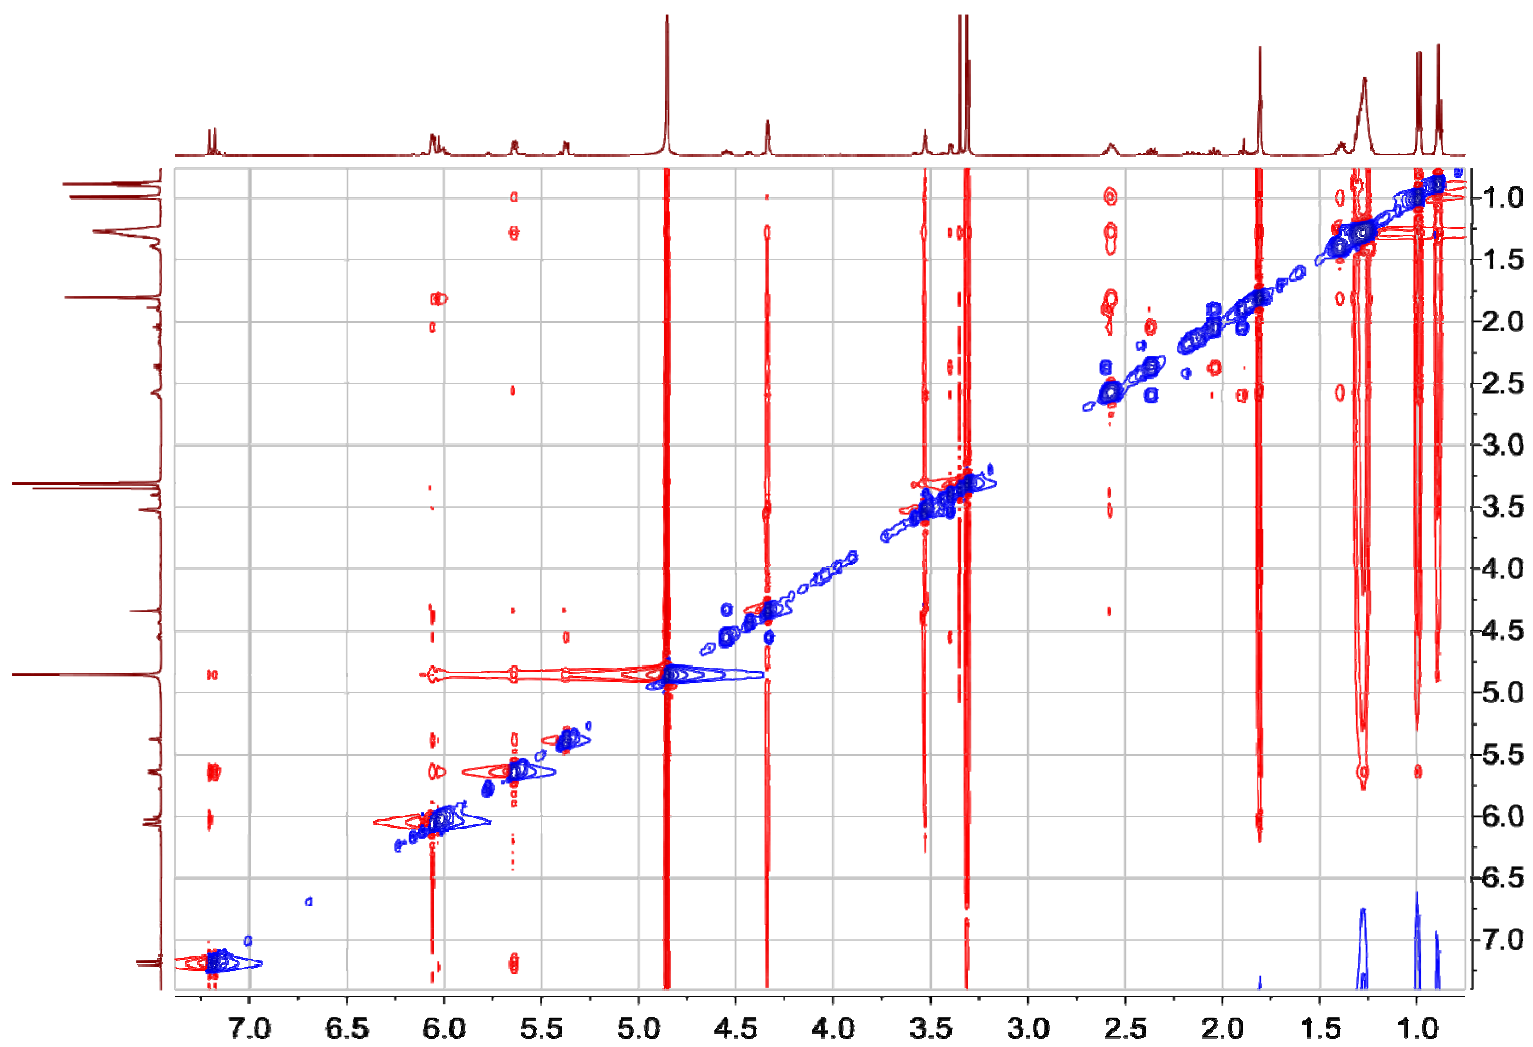

Figure S46. ROESY (600MHz, methanol- $d_4$ ) spectrum of compound 6.

## Mass Spectrum SmartFormula Report

### Analysis Info

Analysis Name D:\Data\Spektren 2015\Proksch15HR000331.d  
Method tune\_low.m  
Sample Name Hao Br-2-72-2 (CH3OH)  
Comment 0,8 ug/ml,

Acquisition Date 9/22/2015 3:53:48 PM

Operator Peter Tommes  
Instrument maXis 288882.20213

### Acquisition Parameter

|             |            |                       |           |                  |           |
|-------------|------------|-----------------------|-----------|------------------|-----------|
| Source Type | ESI        | Ion Polarity          | Positive  | Set Nebulizer    | 0.3 Bar   |
| Focus       | Not active | Set Capillary         | 4000 V    | Set Dry Heater   | 180 °C    |
| Scan Begin  | 50 m/z     | Set End Plate Offset  | -500 V    | Set Dry Gas      | 4.0 l/min |
| Scan End    | 1500 m/z   | Set Collision Cell RF | 600.0 Vpp | Set Divert Valve | Source    |

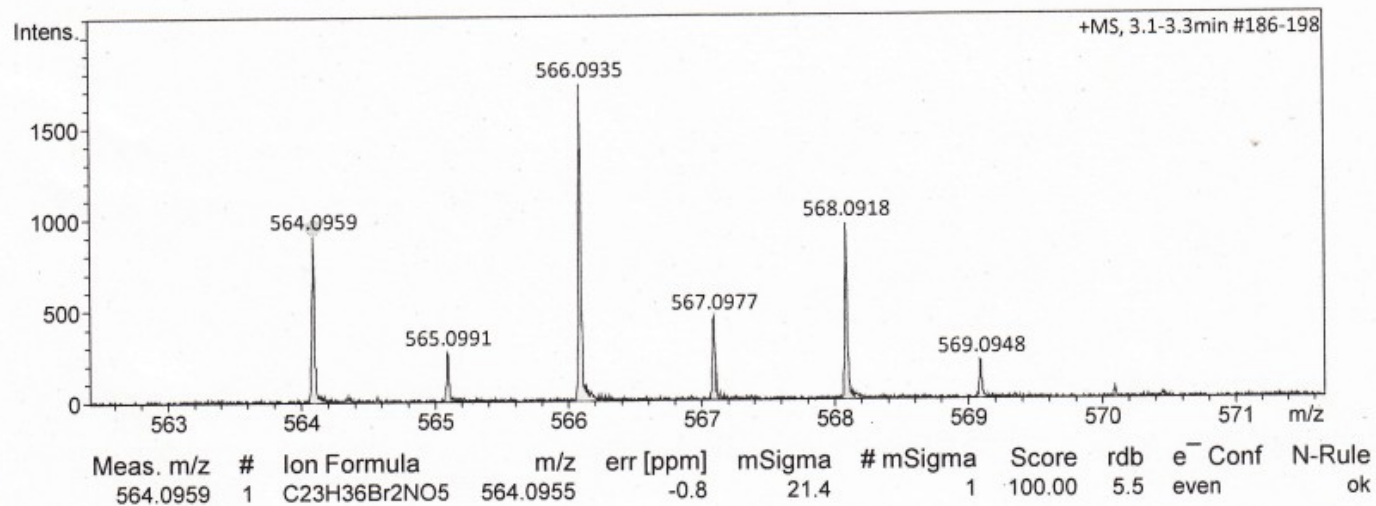

Figure S47. HRESIMS of compound 7.

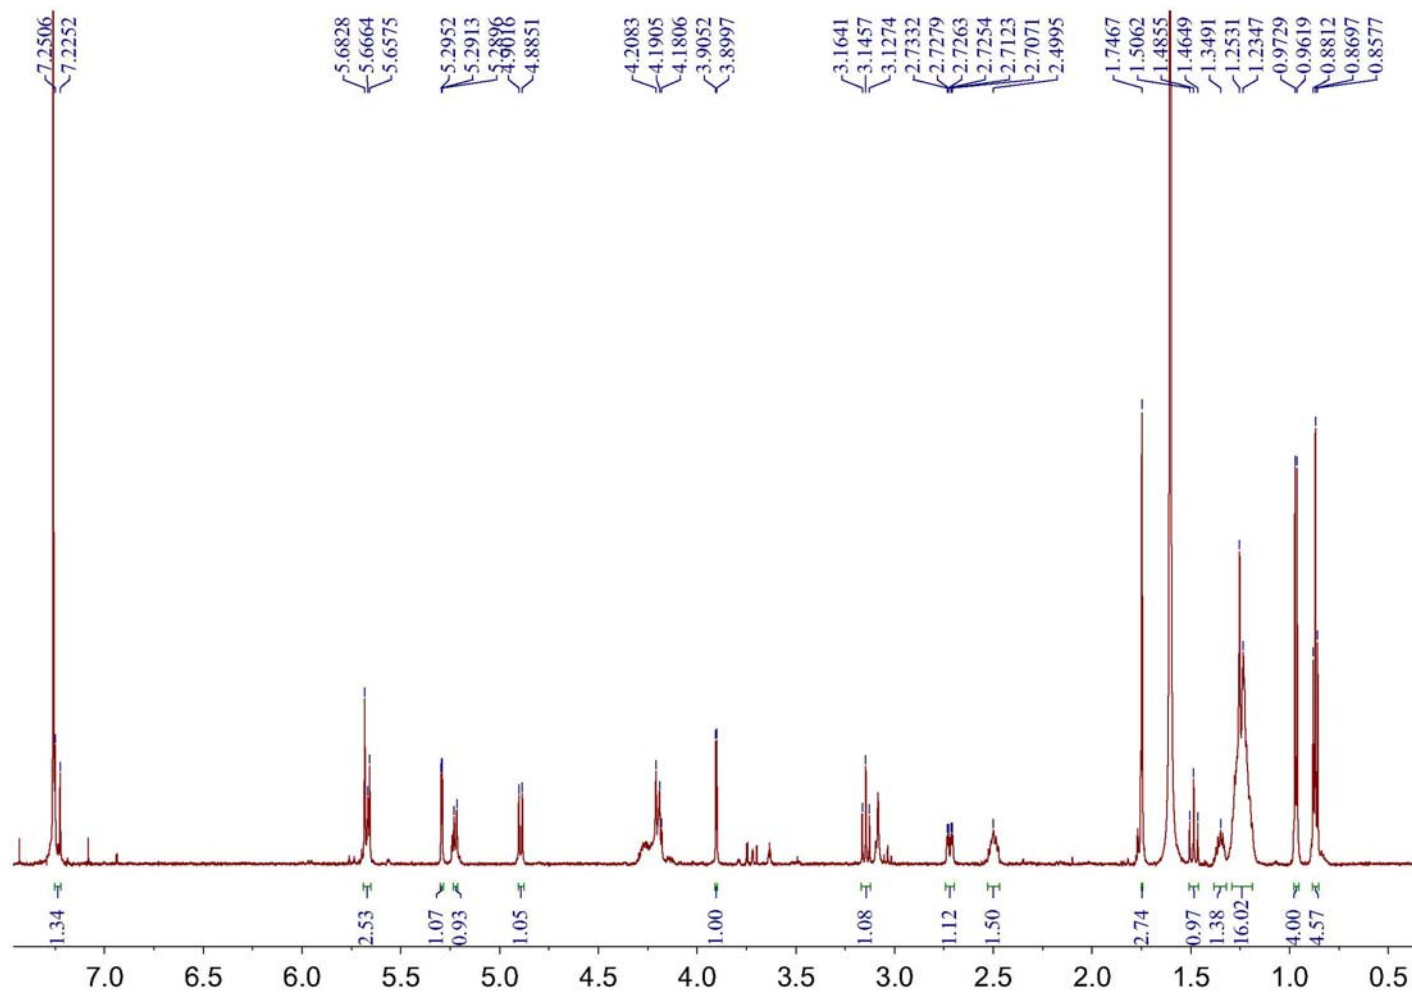

Figure S48. <sup>1</sup>H NMR (600MHz, CDCl<sub>3</sub>) spectrum of compound 7.

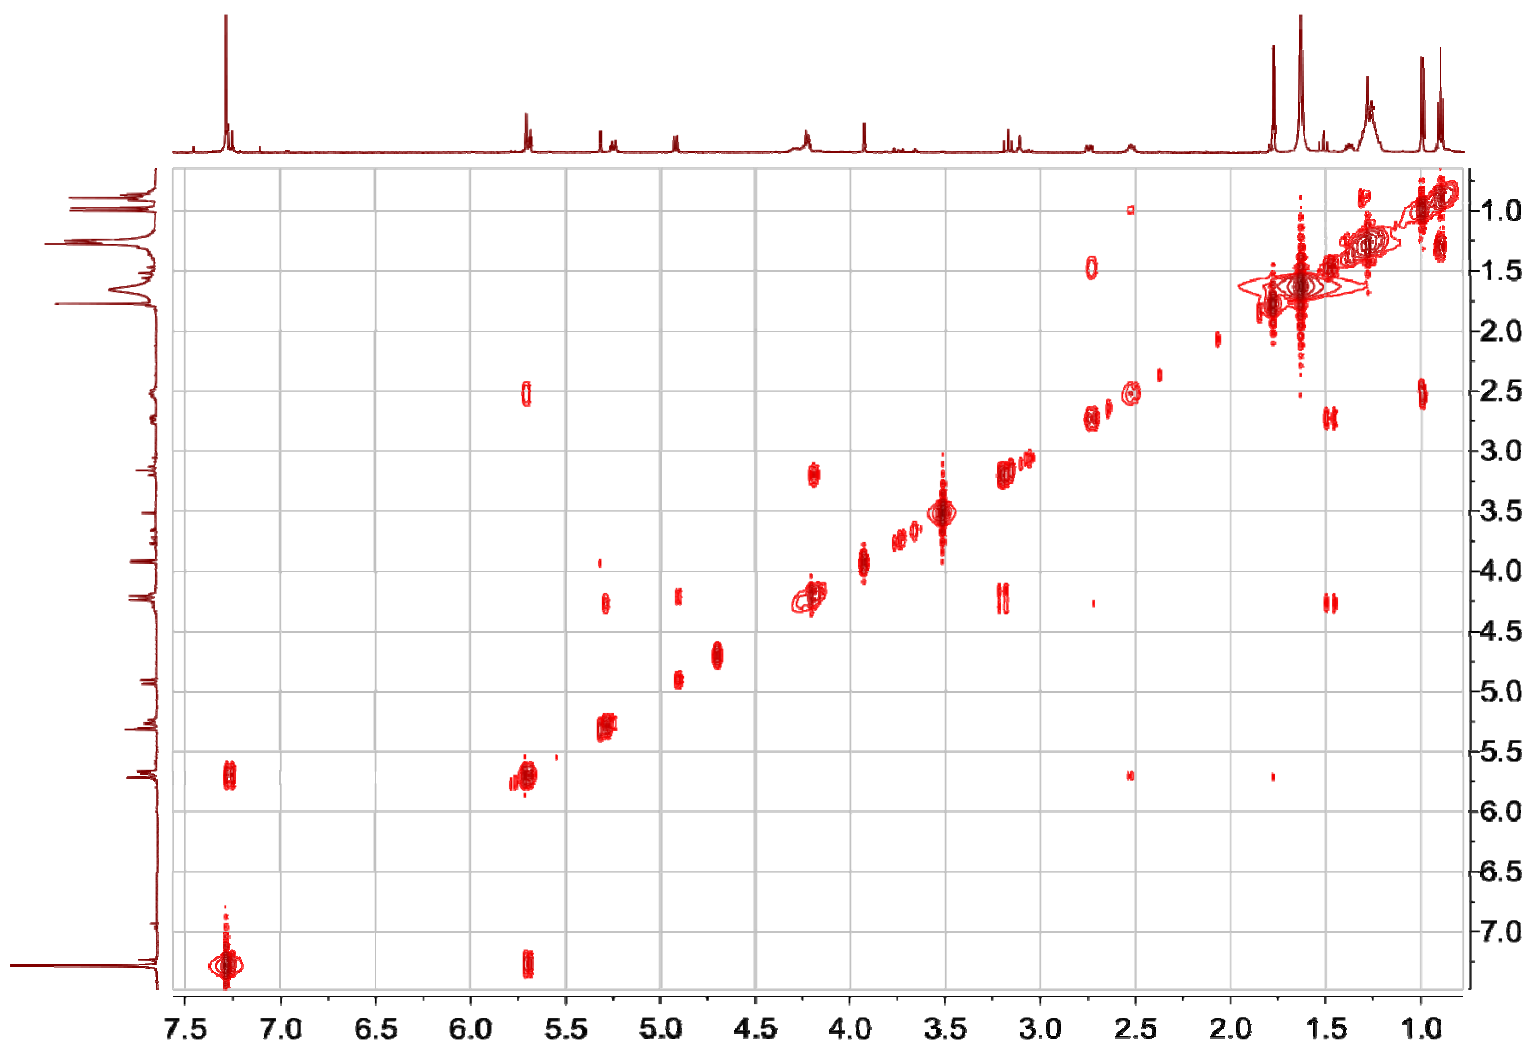

Figure S49.  $^1\text{H}$ - $^1\text{H}$  COSY (600MHz,  $\text{CDCl}_3$ ) spectrum of compound 7.

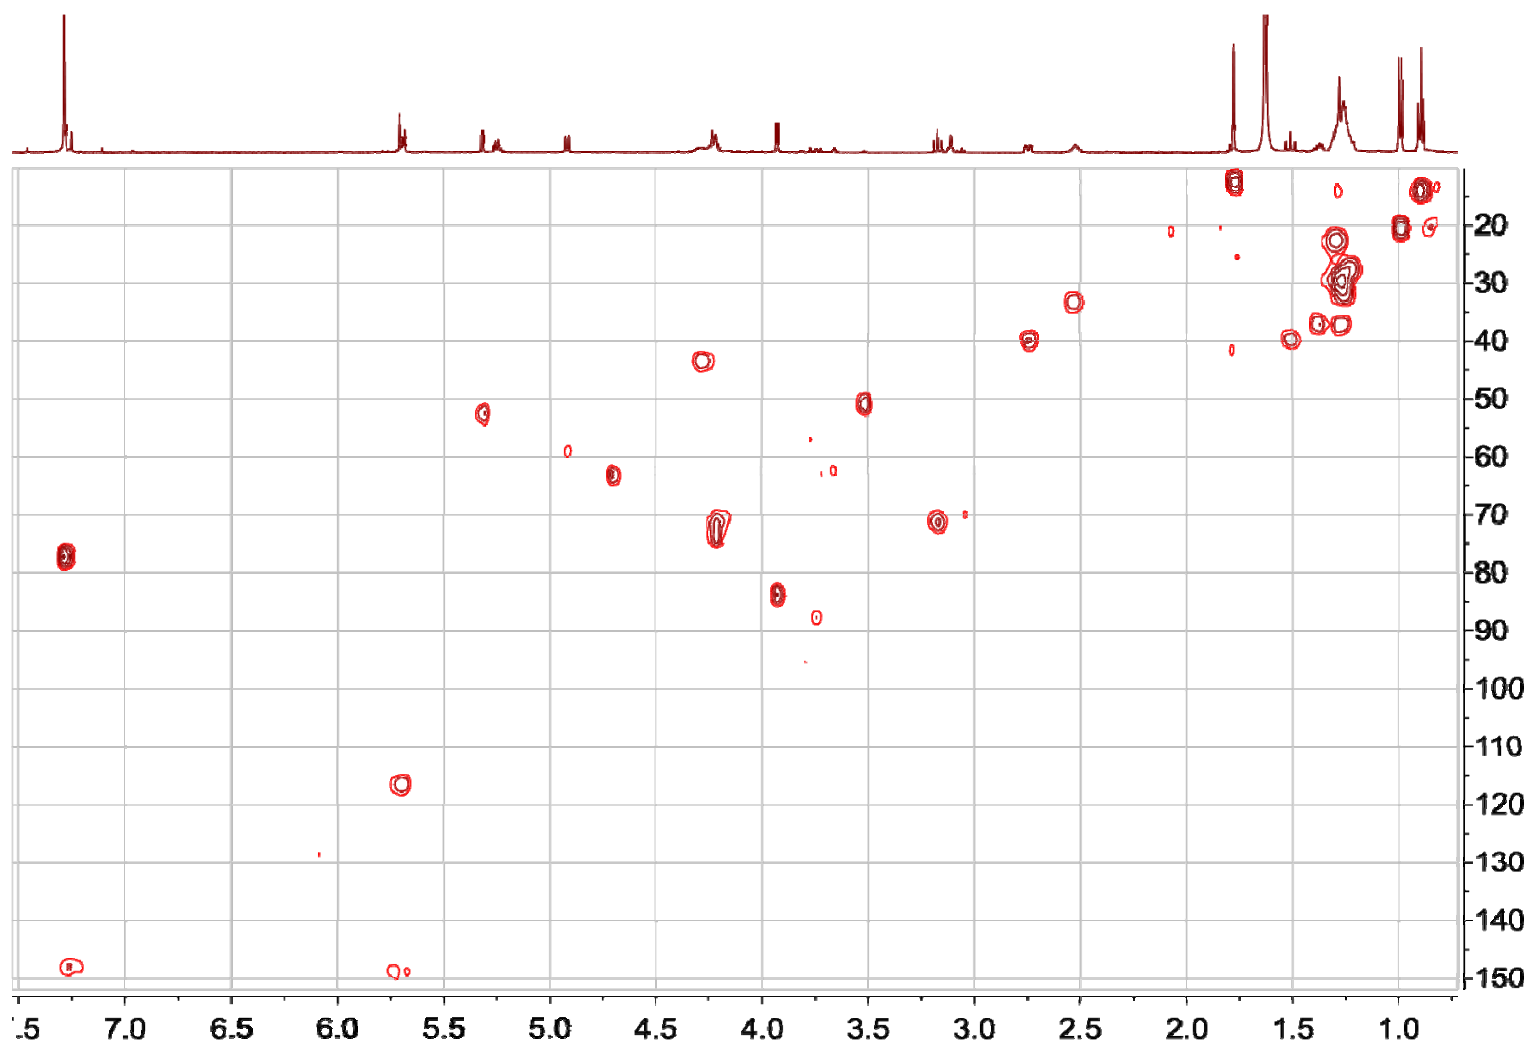

Figure S50. HSQC (600MHz, 150MHz, CDCl<sub>3</sub>) spectrum of compound 7.

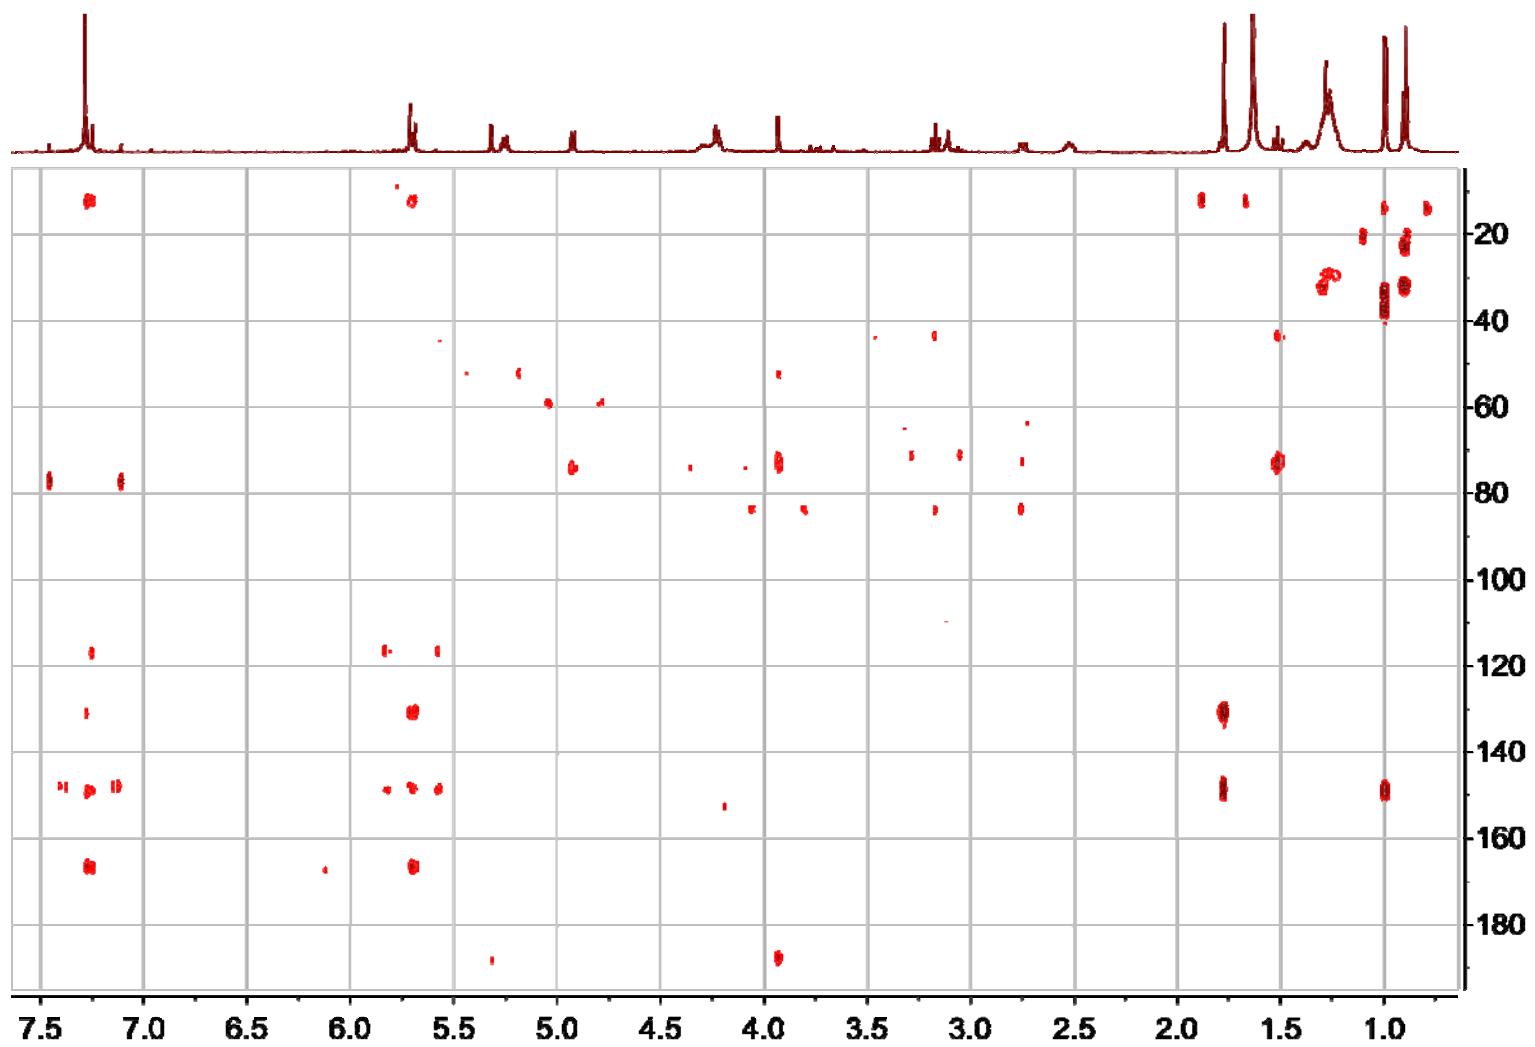

Figure S51. HMBC (600MHz, 150MHz, CDCl<sub>3</sub>) spectrum of compound 7.

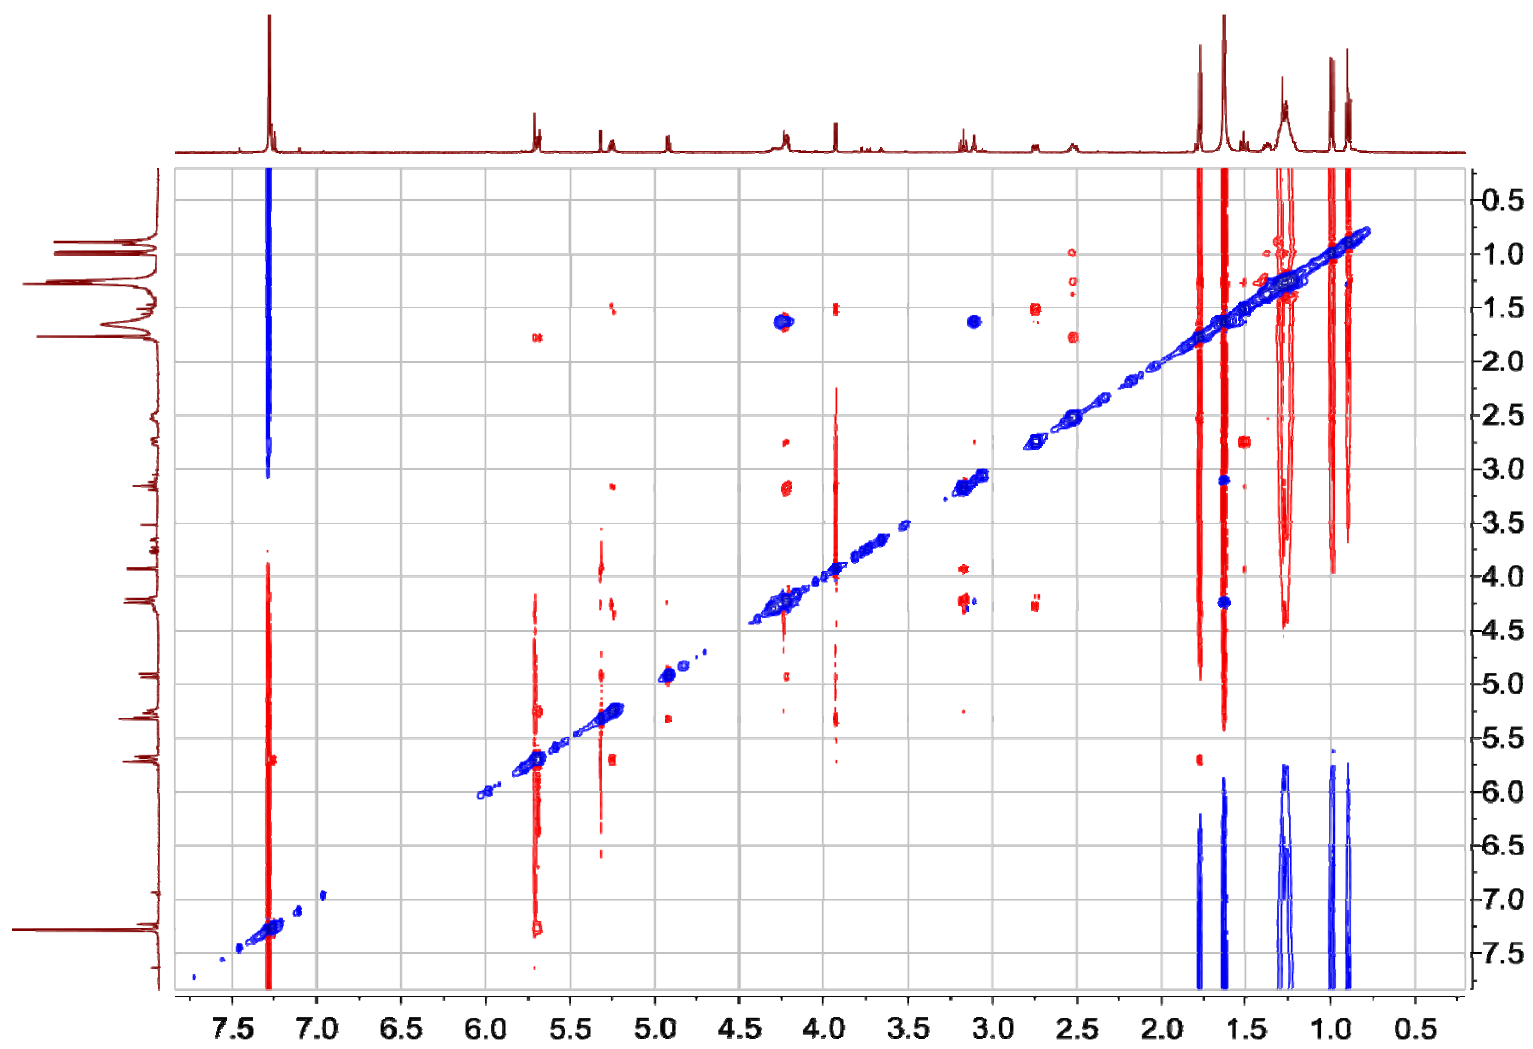

Figure S52. ROESY (600MHz, CDCl<sub>3</sub>) spectrum of compound 7.

## X-ray crystallographic parameters of compound 1 (CCDC 1481781)

*Crystallization conditions:* X-ray quality crystal of **1** was obtained by slow evaporation from MeOH solution. A suitable single crystal was carefully selected under a polarizing microscope. *Data collection:* Bruker Kappa APEX2 CCD diffractometer (with microfocus tube), Mo-K $\alpha$  radiation ( $\lambda = 0.71073 \text{ \AA}$ ), multilayer mirror,  $\omega$ - and  $\phi$ -scan; data collection with APEX2, cell refinement and data reduction with SAINT,<sup>1</sup> experimental absorption correction with SADABS.<sup>2</sup> *Structure Analysis and Refinement:* The structure was solved by direct methods using SHELXS-97; refinement was done by full-matrix least squares on  $F^2$  using the SHELXL-97 program suite.<sup>3</sup> All non-hydrogen positions were refined with anisotropic displacement parameters. Hydrogen atoms were positioned geometrically (with C-H = 0.95  $\text{\AA}$  for aromatic/olefinic CH, 1.00  $\text{\AA}$  for tertiary CH, 0.99  $\text{\AA}$  for CH<sub>2</sub> and 0.98  $\text{\AA}$  for CH<sub>3</sub>) and refined using riding models (AFIX 43, 13, 23 and 133 or 137, respectively), with  $U_{\text{iso}}(\text{H}) = -1.2U_{\text{eq}}(\text{CH}, \text{CH}_2)$  and  $-1.5U_{\text{eq}}(\text{CH}_3)$ . The hydrogen atoms on the hydroxyl groups with O1 and O7 (methanol solvent molecule) were found and refined with  $U_{\text{iso}}(\text{H}) = 1.5U_{\text{eq}}(\text{O})$ . The N-H hydrogen atom has been found and refined with  $U_{\text{iso}}(\text{H}) = 1.5U_{\text{eq}}(\text{N})$ . The H atoms on O2 and O5 had to be calculated and refined with AFIX 83 to avoid their wrong intramolecular positioning (O2-H towards O5 and O5-H towards O3) which would lead to C-O-H angles  $< 92^\circ$ . The apparent disorder due higher thermal motion and less constrained crystal packing of the bent alkyl chain and the methyl group of the methanol solvent molecules leads to short intermolecular H $\cdots$ H contacts and short C-C bonds as artefacts which are noted as Alert level A and B in the Checkcif file.

The gymnastatin T molecule (**1**) crystallizes in the non-centrosymmetric orthorhombic



space group  $P 2_12_12_1$ . A methanol solvent molecule of crystallization is embedded in the crystal lattice per formula unit (**Figure S53**). The O-H and N-H group are part of a hydrogen-bonding network (**Figure S54**, **Table S5**). The larger thermal ellipsoids of the carbon atoms of the bent alkyl chain indicate their higher thermal motion and less constrained crystal packing compared to the more rigid hydrogen-bonded part, the OH-functionalized bicyclo[3.3.1]nonane ring of the molecule. The unit cell packing can be seen as a separation of the hydrophilic hydrogen-bonding part, the OH-substituted bicyclo[3.3.1]nonane ring of the molecule (in layers parallel to the  $ab$  plane) and the hydrophobic branched alkyl chain (sandwiched between the hydrophilic layers) (**Figure S55**).<sup>4</sup> The bent alkyl chains from adjacent molecules interdigitate (interlock) along the  $c$  direction.<sup>5</sup>

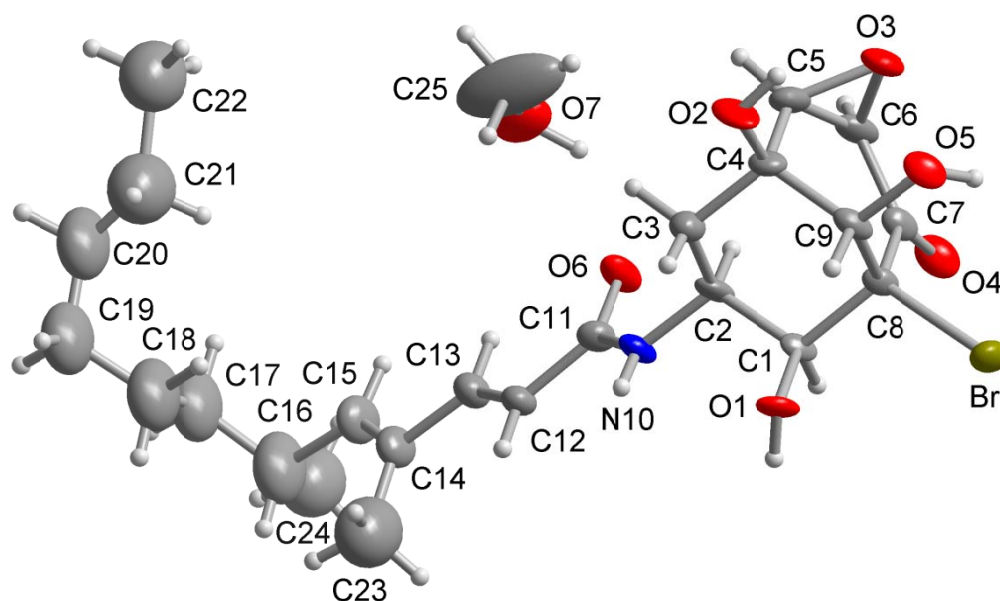

**Figure S53.** Molecular structure of **1** from single-crystal X-ray diffractometry (50% thermal ellipsoids, 20% for C25, H atoms of arbitrary radii).

**Table S1.** Crystal data and structure refinement for **1**

|                                                         |                                                                       |
|---------------------------------------------------------|-----------------------------------------------------------------------|
| Compound                                                | <b>1</b>                                                              |
| Data set                                                | Br_5_30_2                                                             |
| CCDC number                                             | 1481781                                                               |
| Empirical formula                                       | C <sub>23</sub> H <sub>34</sub> BrNO <sub>6</sub> ·CH <sub>3</sub> OH |
| M/g mol <sup>-1</sup>                                   | 532.46                                                                |
| Crystal size/mm <sup>3</sup>                            | 0.40 × 0.05 × 0.01                                                    |
| Temperature/K                                           | 150                                                                   |
| θ range/° (completeness)                                | 2.5–25.3° (0.99)                                                      |
| h; k; l range                                           | -8/9, 14/14, -41/42                                                   |
| Crystal system                                          | Orthorhombic                                                          |
| Space group                                             | <i>P</i> 2 <sub>1</sub> 2 <sub>1</sub> 2 <sub>1</sub>                 |
| a/Å                                                     | 7.0251(3)                                                             |
| b/Å                                                     | 11.3852(5)                                                            |
| c/Å                                                     | 32.3080(15)                                                           |
| α/°                                                     | 90                                                                    |
| β/°                                                     | 90                                                                    |
| γ/°                                                     | 90                                                                    |
| V/Å <sup>3</sup>                                        | 2584.1(2)                                                             |
| Z                                                       | 4                                                                     |
| D <sub>calc</sub> /g cm <sup>-3</sup>                   | 1.369                                                                 |
| μ (Mo Kα)/mm <sup>-1</sup>                              | 1.63                                                                  |
| F(000)                                                  | 1120                                                                  |
| Max./min. transmission                                  | 0.674, 0.746                                                          |
| Reflections collected                                   | 39194                                                                 |
| Independent reflect. (R <sub>int</sub> )                | 6086 (0.0445)                                                         |
| Data/restraints/parameters                              | 6088/5/275                                                            |
| Max./min. Δρ/e Å <sup>-3</sup> <sup>a</sup>             | 1.469/-0.977                                                          |
| R <sub>1</sub> /wR <sub>2</sub> [I>2σ(I)] <sup>b</sup>  | 0.0626/0.1579                                                         |
| R <sub>1</sub> /wR <sub>2</sub> (all data) <sup>b</sup> | 0.0747/0.1637                                                         |
| Goodness-of-fit on F <sup>2</sup> <sup>c</sup>          | 1.092                                                                 |
| Flack parameter <sup>d</sup>                            | 0.043(4)                                                              |

<sup>a</sup> Largest difference peak and hole; <sup>b</sup> R<sub>1</sub> = [Σ(|F<sub>o</sub>| - |F<sub>c</sub>|)/Σ|F<sub>o</sub>|]; wR<sub>2</sub> = [Σ[w(F<sub>o</sub><sup>2</sup> - F<sub>c</sub><sup>2</sup>)<sup>2</sup>]/Σ[w(F<sub>o</sub><sup>2</sup>)<sup>2</sup>]]<sup>1/2</sup>; <sup>c</sup> Goodness-of-fit = [Σ[w(F<sub>o</sub><sup>2</sup> - F<sub>c</sub><sup>2</sup>)<sup>2</sup>]/(n - p)]<sup>1/2</sup>; <sup>d</sup> Absolute structure parameter.<sup>6</sup>

**Table S2.** Fractional atomic coordinates and isotropic or equivalent isotropic displacement parameters ( $\text{\AA}^2$ ) for **1**.

|     | <i>x</i>    | <i>y</i>    | <i>z</i>     | $U_{\text{iso}}^*/U_{\text{eq}}$ |
|-----|-------------|-------------|--------------|----------------------------------|
| Br  | 0.94426 (9) | 1.08655 (6) | 0.19418 (2)  | 0.0331 (2)                       |
| C1  | 0.8297 (8)  | 0.9768 (5)  | 0.2698 (2)   | 0.0202 (12)                      |
| H1A | 0.8167      | 0.9026      | 0.2535       | 0.024*                           |
| O1  | 1.0197 (6)  | 0.9889 (4)  | 0.28372 (16) | 0.0254 (10)                      |
| H1  | 1.064 (12)  | 0.922 (5)   | 0.279 (2)    | 0.038*                           |
| C2  | 0.6985 (8)  | 0.9727 (5)  | 0.3068 (2)   | 0.0254 (13)                      |
| H2A | 0.5659      | 0.9626      | 0.2961       | 0.030*                           |
| C3  | 0.7037 (10) | 1.0866 (6)  | 0.3311 (2)   | 0.0302 (13)                      |
| H3A | 0.8320      | 1.0969      | 0.3432       | 0.036*                           |
| H3B | 0.6109      | 1.0822      | 0.3541       | 0.036*                           |
| C4  | 0.6570 (9)  | 1.1935 (5)  | 0.3039 (2)   | 0.0275 (13)                      |
| O2  | 0.6805 (9)  | 1.2931 (4)  | 0.32925 (18) | 0.0448 (15)                      |
| H2  | 0.6520      | 1.3538      | 0.3158       | 0.067*                           |
| C5  | 0.4558 (11) | 1.1811 (6)  | 0.2891 (2)   | 0.0343 (16)                      |
| H5A | 0.3559      | 1.1797      | 0.3111       | 0.041*                           |
| O3  | 0.4054 (7)  | 1.2410 (4)  | 0.25144 (16) | 0.0322 (11)                      |
| O5  | 0.7751 (6)  | 1.3017 (4)  | 0.24330 (16) | 0.0283 (10)                      |
| H5  | 0.7530      | 1.2839      | 0.2185       | 0.042*                           |
| C6  | 0.4112 (9)  | 1.1138 (6)  | 0.2507 (2)   | 0.0306 (15)                      |
| H6A | 0.2859      | 1.0722      | 0.2499       | 0.037*                           |
| C7  | 0.5720 (9)  | 1.0579 (5)  | 0.2273 (2)   | 0.0249 (13)                      |
| O4  | 0.5394 (8)  | 0.9852 (4)  | 0.20181 (16) | 0.0357 (11)                      |
| C8  | 0.7758 (7)  | 1.0839 (6)  | 0.24217 (19) | 0.0213 (11)                      |
| C9  | 0.7976 (9)  | 1.1982 (5)  | 0.2668 (2)   | 0.0252 (14)                      |
| H9  | 0.9294      | 1.1992      | 0.2785       | 0.030*                           |
| N10 | 0.7407 (8)  | 0.8721 (5)  | 0.33274 (19) | 0.0263 (12)                      |
| H10 | 0.864 (9)   | 0.879 (7)   | 0.343 (2)    | 0.039*                           |
| C11 | 0.6062 (8)  | 0.7934 (6)  | 0.3423 (2)   | 0.0258 (14)                      |

|      |             |             |              |             |
|------|-------------|-------------|--------------|-------------|
| O6   | 0.4378 (7)  | 0.8024 (4)  | 0.32919 (16) | 0.0358 (11) |
| C12  | 0.6652 (10) | 0.6938 (6)  | 0.3689 (2)   | 0.0275 (14) |
| H12  | 0.7938      | 0.6869      | 0.3776       | 0.033*      |
| C13  | 0.5372 (11) | 0.6140 (6)  | 0.3806 (2)   | 0.0331 (15) |
| H13  | 0.4106      | 0.6271      | 0.3714       | 0.040*      |
| C15  | 0.4129 (13) | 0.4462 (7)  | 0.4146 (3)   | 0.047 (2)   |
| H15  | 0.2948      | 0.4750      | 0.4045       | 0.056*      |
| C16  | 0.407 (3)   | 0.3322 (11) | 0.4394 (4)   | 0.094 (2)   |
| H16  | 0.5385      | 0.3039      | 0.4457       | 0.113*      |
| C17  | 0.296 (3)   | 0.3515 (12) | 0.4784 (4)   | 0.094 (2)   |
| H17A | 0.2717      | 0.2749      | 0.4919       | 0.113*      |
| H17B | 0.1712      | 0.3870      | 0.4715       | 0.113*      |
| C14  | 0.5664 (13) | 0.5091 (6)  | 0.4058 (2)   | 0.0389 (16) |
| C18  | 0.400 (3)   | 0.4306 (11) | 0.5081 (4)   | 0.094 (2)   |
| H18A | 0.5280      | 0.3969      | 0.5131       | 0.113*      |
| H18B | 0.4183      | 0.5078      | 0.4946       | 0.113*      |
| C19  | 0.307 (3)   | 0.4500 (12) | 0.5485 (4)   | 0.094 (2)   |
| H19A | 0.2852      | 0.3732      | 0.5620       | 0.113*      |
| H19B | 0.3936      | 0.4962      | 0.5664       | 0.113*      |
| C20  | 0.130 (2)   | 0.5107 (12) | 0.5447 (4)   | 0.094 (2)   |
| H20A | 0.0428      | 0.4550      | 0.5306       | 0.113*      |
| H20B | 0.0811      | 0.5194      | 0.5732       | 0.113*      |
| C21  | 0.102 (3)   | 0.6087 (14) | 0.5274 (6)   | 0.116 (3)   |
| H21A | 0.1329      | 0.5957      | 0.4979       | 0.139*      |
| H21B | 0.2038      | 0.6605      | 0.5383       | 0.139*      |
| C22  | -0.091 (3)  | 0.6901 (14) | 0.5273 (5)   | 0.116 (3)   |
| H22A | -0.0559     | 0.7726      | 0.5233       | 0.173*      |
| H22B | -0.1576     | 0.6812      | 0.5538       | 0.173*      |
| H22C | -0.1748     | 0.6649      | 0.5047       | 0.173*      |
| C23  | 0.771 (3)   | 0.4818 (15) | 0.4187 (6)   | 0.116 (3)   |
| H23A | 0.8468      | 0.4636      | 0.3942       | 0.173*      |
| H23B | 0.7712      | 0.4142      | 0.4375       | 0.173*      |

|      |            |             |             |           |
|------|------------|-------------|-------------|-----------|
| H23C | 0.8251     | 0.5501      | 0.4329      | 0.173*    |
| C24  | 0.297 (3)  | 0.2407 (15) | 0.4134 (5)  | 0.116 (3) |
| H24A | 0.1806     | 0.2764      | 0.4025      | 0.173*    |
| H24B | 0.2640     | 0.1734      | 0.4309      | 0.173*    |
| H24C | 0.3772     | 0.2142      | 0.3904      | 0.173*    |
| C25  | 0.173 (4)  | 0.944 (4)   | 0.3908 (14) | 0.34 (3)  |
| H25A | 0.0883     | 0.9704      | 0.4131      | 0.503*    |
| H25B | 0.1786     | 1.0047      | 0.3692      | 0.503*    |
| H25C | 0.3012     | 0.9314      | 0.4020      | 0.503*    |
| O7   | 0.1023 (9) | 0.8365 (8)  | 0.3735 (2)  | 0.066 (2) |
| H7   | 0.148 (19) | 0.826 (13)  | 0.347 (2)   | 0.099*    |

**Table S3.** Atomic displacement parameters ( $\text{\AA}^2$ ) for **1**.

|     | $U^{11}$    | $U^{22}$   | $U^{33}$   | $U^{12}$     | $U^{13}$    | $U^{23}$   |
|-----|-------------|------------|------------|--------------|-------------|------------|
| Br  | 0.0232 (3)  | 0.0367 (3) | 0.0396 (3) | 0.0050 (3)   | 0.0103 (3)  | 0.0075 (3) |
| C1  | 0.016 (3)   | 0.009 (3)  | 0.036 (4)  | -0.003 (2)   | -0.001 (2)  | 0.007 (2)  |
| O1  | 0.0088 (19) | 0.019 (2)  | 0.048 (3)  | 0.0035 (15)  | 0.0011 (17) | 0.002 (2)  |
| C2  | 0.012 (2)   | 0.021 (3)  | 0.043 (4)  | 0.004 (2)    | -0.001 (3)  | 0.010 (3)  |
| C3  | 0.031 (3)   | 0.026 (3)  | 0.033 (3)  | 0.007 (3)    | 0.004 (3)   | 0.005 (3)  |
| C4  | 0.029 (3)   | 0.019 (3)  | 0.035 (4)  | 0.009 (2)    | 0.001 (3)   | -0.004 (3) |
| O2  | 0.065 (4)   | 0.023 (2)  | 0.047 (3)  | 0.027 (3)    | -0.012 (3)  | -0.011 (2) |
| C5  | 0.025 (3)   | 0.032 (4)  | 0.046 (4)  | 0.012 (3)    | 0.011 (3)   | 0.008 (3)  |
| O3  | 0.025 (3)   | 0.022 (2)  | 0.049 (3)  | 0.0080 (19)  | -0.003 (2)  | 0.007 (2)  |
| O5  | 0.025 (2)   | 0.015 (2)  | 0.044 (3)  | -0.0085 (18) | -0.008 (2)  | 0.004 (2)  |
| C6  | 0.014 (3)   | 0.026 (3)  | 0.052 (4)  | 0.001 (2)    | 0.001 (3)   | 0.013 (3)  |
| C7  | 0.019 (3)   | 0.018 (3)  | 0.038 (3)  | -0.005 (2)   | -0.001 (3)  | 0.010 (2)  |
| O4  | 0.035 (3)   | 0.024 (2)  | 0.048 (3)  | -0.009 (2)   | -0.011 (2)  | 0.004 (2)  |
| C8  | 0.014 (2)   | 0.016 (3)  | 0.034 (3)  | -0.003 (2)   | 0.000 (2)   | 0.005 (3)  |
| C9  | 0.018 (3)   | 0.016 (3)  | 0.041 (4)  | -0.003 (2)   | -0.006 (3)  | 0.009 (3)  |
| N10 | 0.018 (2)   | 0.023 (3)  | 0.038 (3)  | 0.004 (2)    | -0.004 (2)  | 0.011 (2)  |
| C11 | 0.016 (3)   | 0.024 (3)  | 0.038 (4)  | -0.002 (2)   | 0.001 (2)   | 0.003 (3)  |

|     |           |           |           |            |            |            |
|-----|-----------|-----------|-----------|------------|------------|------------|
| O6  | 0.016 (2) | 0.040 (3) | 0.051 (3) | -0.002 (2) | -0.002 (2) | 0.019 (2)  |
| C12 | 0.025 (3) | 0.026 (3) | 0.032 (4) | 0.006 (3)  | 0.001 (3)  | 0.006 (3)  |
| C13 | 0.033 (3) | 0.030 (4) | 0.037 (4) | 0.004 (3)  | 0.001 (3)  | 0.009 (3)  |
| C15 | 0.051 (5) | 0.034 (4) | 0.054 (5) | -0.009 (4) | 0.010 (4)  | 0.016 (3)  |
| C16 | 0.134 (6) | 0.069 (4) | 0.078 (4) | -0.011 (4) | 0.014 (4)  | 0.023 (3)  |
| C17 | 0.134 (6) | 0.069 (4) | 0.078 (4) | -0.011 (4) | 0.014 (4)  | 0.023 (3)  |
| C14 | 0.046 (4) | 0.027 (3) | 0.044 (4) | -0.001 (4) | 0.007 (4)  | 0.012 (3)  |
| C18 | 0.134 (6) | 0.069 (4) | 0.078 (4) | -0.011 (4) | 0.014 (4)  | 0.023 (3)  |
| C19 | 0.134 (6) | 0.069 (4) | 0.078 (4) | -0.011 (4) | 0.014 (4)  | 0.023 (3)  |
| C20 | 0.134 (6) | 0.069 (4) | 0.078 (4) | -0.011 (4) | 0.014 (4)  | 0.023 (3)  |
| C21 | 0.139 (8) | 0.090 (6) | 0.118 (6) | 0.003 (5)  | 0.024 (6)  | 0.016 (5)  |
| C22 | 0.139 (8) | 0.090 (6) | 0.118 (6) | 0.003 (5)  | 0.024 (6)  | 0.016 (5)  |
| C23 | 0.139 (8) | 0.090 (6) | 0.118 (6) | 0.003 (5)  | 0.024 (6)  | 0.016 (5)  |
| C24 | 0.139 (8) | 0.090 (6) | 0.118 (6) | 0.003 (5)  | 0.024 (6)  | 0.016 (5)  |
| C25 | 0.13 (2)  | 0.41 (6)  | 0.47 (7)  | -0.01 (3)  | -0.03 (3)  | -0.28 (6)  |
| O7  | 0.036 (3) | 0.096 (6) | 0.066 (4) | 0.012 (3)  | 0.000 (3)  | -0.013 (4) |

**Table S4.** Geometric parameters (Å, °) for **1**.

|        |            |          |            |
|--------|------------|----------|------------|
| Br—C8  | 1.951 (6)  | C15—C14  | 1.326 (12) |
| C1—O1  | 1.415 (7)  | C15—C16  | 1.525 (14) |
| C1—C2  | 1.509 (10) | C15—H15  | 0.9500     |
| C1—C8  | 1.559 (8)  | C16—C17  | 1.500 (19) |
| C1—H1A | 1.0000     | C16—C24  | 1.54 (2)   |
| O1—H1  | 0.84 (5)   | C16—H16  | 1.0000     |
| C2—N10 | 1.450 (8)  | C17—C18  | 1.51 (2)   |
| C2—C3  | 1.516 (10) | C17—H17A | 0.9900     |
| C2—H2A | 1.0000     | C17—H17B | 0.9900     |
| C3—C4  | 1.536 (9)  | C14—C23  | 1.53 (2)   |
| C3—H3A | 0.9900     | C18—C19  | 1.476 (19) |
| C3—H3B | 0.9900     | C18—H18A | 0.9900     |
| C4—O2  | 1.410 (8)  | C18—H18B | 0.9900     |

|           |            |             |            |
|-----------|------------|-------------|------------|
| C4—C5     | 1.499 (10) | C19—C20     | 1.43 (2)   |
| C4—C9     | 1.553 (10) | C19—H19A    | 0.9900     |
| O2—H2     | 0.8400     | C19—H19B    | 0.9900     |
| C5—O3     | 1.438 (8)  | C20—C21     | 1.262 (18) |
| C5—C6     | 1.491 (11) | C20—H20A    | 0.9900     |
| C5—H5A    | 1.0000     | C20—H20B    | 0.9900     |
| O3—C6     | 1.449 (8)  | C21—C22     | 1.64 (2)   |
| O5—C9     | 1.410 (8)  | C21—H21A    | 0.9900     |
| O5—H5     | 0.8400     | C21—H21B    | 0.9900     |
| C6—C7     | 1.500 (9)  | C22—H22A    | 0.9800     |
| C6—H6A    | 1.0000     | C22—H22B    | 0.9800     |
| C7—O4     | 1.190 (8)  | C22—H22C    | 0.9800     |
| C7—C8     | 1.539 (8)  | C23—H23A    | 0.9800     |
| C8—C9     | 1.534 (9)  | C23—H23B    | 0.9800     |
| C9—H9     | 1.0000     | C23—H23C    | 0.9800     |
| N10—C11   | 1.338 (8)  | C24—H24A    | 0.9800     |
| N10—H10   | 0.93 (6)   | C24—H24B    | 0.9800     |
| C11—O6    | 1.261 (8)  | C24—H24C    | 0.9800     |
| C11—C12   | 1.482 (9)  | C25—O7      | 1.44 (3)   |
| C12—C13   | 1.333 (10) | C25—H25A    | 0.9800     |
| C12—H12   | 0.9500     | C25—H25B    | 0.9800     |
| C13—C14   | 1.459 (9)  | C25—H25C    | 0.9800     |
| C13—H13   | 0.9500     | O7—H7       | 0.91 (6)   |
|           |            |             |            |
| O1—C1—C2  | 109.2 (5)  | C14—C15—C16 | 126.5 (10) |
| O1—C1—C8  | 109.5 (5)  | C14—C15—H15 | 116.7      |
| C2—C1—C8  | 109.2 (5)  | C16—C15—H15 | 116.7      |
| O1—C1—H1A | 109.6      | C17—C16—C15 | 109.3 (11) |
| C2—C1—H1A | 109.6      | C17—C16—C24 | 107.2 (14) |
| C8—C1—H1A | 109.6      | C15—C16—C24 | 107.6 (11) |
| C1—O1—H1  | 102 (6)    | C17—C16—H16 | 110.9      |
| N10—C2—C1 | 110.9 (5)  | C15—C16—H16 | 110.9      |

|            |           |               |            |
|------------|-----------|---------------|------------|
| N10—C2—C3  | 111.9 (6) | C24—C16—H16   | 110.9      |
| C1—C2—C3   | 111.6 (5) | C16—C17—C18   | 111.7 (13) |
| N10—C2—H2A | 107.4     | C16—C17—H17A  | 109.3      |
| C1—C2—H2A  | 107.4     | C18—C17—H17A  | 109.3      |
| C3—C2—H2A  | 107.4     | C16—C17—H17B  | 109.3      |
| C2—C3—C4   | 112.1 (5) | C18—C17—H17B  | 109.3      |
| C2—C3—H3A  | 109.2     | H17A—C17—H17B | 107.9      |
| C4—C3—H3A  | 109.2     | C15—C14—C13   | 116.6 (8)  |
| C2—C3—H3B  | 109.2     | C15—C14—C23   | 126.5 (9)  |
| C4—C3—H3B  | 109.2     | C13—C14—C23   | 116.8 (9)  |
| H3A—C3—H3B | 107.9     | C19—C18—C17   | 115.9 (14) |
| O2—C4—C5   | 111.8 (5) | C19—C18—H18A  | 108.3      |
| O2—C4—C3   | 106.2 (6) | C17—C18—H18A  | 108.3      |
| C5—C4—C3   | 108.1 (6) | C19—C18—H18B  | 108.3      |
| O2—C4—C9   | 110.2 (6) | C17—C18—H18B  | 108.3      |
| C5—C4—C9   | 111.0 (6) | H18A—C18—H18B | 107.4      |
| C3—C4—C9   | 109.4 (5) | C20—C19—C18   | 112.4 (13) |
| C4—O2—H2   | 109.5     | C20—C19—H19A  | 109.1      |
| O3—C5—C6   | 59.3 (4)  | C18—C19—H19A  | 109.1      |
| O3—C5—C4   | 117.2 (6) | C20—C19—H19B  | 109.1      |
| C6—C5—C4   | 120.7 (6) | C18—C19—H19B  | 109.1      |
| O3—C5—H5A  | 115.9     | H19A—C19—H19B | 107.9      |
| C6—C5—H5A  | 115.9     | C21—C20—C19   | 126.8 (16) |
| C4—C5—H5A  | 115.9     | C21—C20—H20A  | 105.6      |
| C5—O3—C6   | 62.2 (5)  | C19—C20—H20A  | 105.6      |
| C9—O5—H5   | 109.5     | C21—C20—H20B  | 105.6      |
| O3—C6—C5   | 58.6 (4)  | C19—C20—H20B  | 105.6      |
| O3—C6—C7   | 117.0 (5) | H20A—C20—H20B | 106.1      |
| C5—C6—C7   | 118.6 (6) | C20—C21—C22   | 128.8 (16) |
| O3—C6—H6A  | 116.7     | C20—C21—H21A  | 105.1      |
| C5—C6—H6A  | 116.7     | C22—C21—H21A  | 105.1      |
| C7—C6—H6A  | 116.7     | C20—C21—H21B  | 105.1      |



|              |           |               |            |
|--------------|-----------|---------------|------------|
| O4—C7—C6     | 119.9 (6) | C22—C21—H21B  | 105.1      |
| O4—C7—C8     | 121.9 (6) | H21A—C21—H21B | 105.9      |
| C6—C7—C8     | 117.5 (6) | C21—C22—H22A  | 109.5      |
| C9—C8—C7     | 114.7 (5) | C21—C22—H22B  | 109.5      |
| C9—C8—C1     | 110.0 (5) | H22A—C22—H22B | 109.5      |
| C7—C8—C1     | 104.8 (5) | C21—C22—H22C  | 109.5      |
| C9—C8—Br     | 109.8 (4) | H22A—C22—H22C | 109.5      |
| C7—C8—Br     | 108.6 (4) | H22B—C22—H22C | 109.5      |
| C1—C8—Br     | 108.7 (4) | C14—C23—H23A  | 109.5      |
| O5—C9—C8     | 114.7 (6) | C14—C23—H23B  | 109.5      |
| O5—C9—C4     | 111.9 (5) | H23A—C23—H23B | 109.5      |
| C8—C9—C4     | 107.9 (5) | C14—C23—H23C  | 109.5      |
| O5—C9—H9     | 107.4     | H23A—C23—H23C | 109.5      |
| C8—C9—H9     | 107.4     | H23B—C23—H23C | 109.5      |
| C4—C9—H9     | 107.4     | C16—C24—H24A  | 109.5      |
| C11—N10—C2   | 121.2 (5) | C16—C24—H24B  | 109.5      |
| C11—N10—H10  | 130 (5)   | H24A—C24—H24B | 109.5      |
| C2—N10—H10   | 109 (5)   | C16—C24—H24C  | 109.5      |
| O6—C11—N10   | 122.1 (6) | H24A—C24—H24C | 109.5      |
| O6—C11—C12   | 121.3 (6) | H24B—C24—H24C | 109.5      |
| N10—C11—C12  | 116.7 (5) | O7—C25—H25A   | 109.5      |
| C13—C12—C11  | 119.8 (6) | O7—C25—H25B   | 109.5      |
| C13—C12—H12  | 120.1     | H25A—C25—H25B | 109.5      |
| C11—C12—H12  | 120.1     | O7—C25—H25C   | 109.5      |
| C12—C13—C14  | 128.4 (7) | H25A—C25—H25C | 109.5      |
| C12—C13—H13  | 115.8     | H25B—C25—H25C | 109.5      |
| C14—C13—H13  | 115.8     | C25—O7—H7     | 110 (10)   |
|              |           |               |            |
| O1—C1—C2—N10 | -61.9 (7) | O1—C1—C8—Br   | 61.3 (6)   |
| C8—C1—C2—N10 | 178.3 (5) | C2—C1—C8—Br   | -179.2 (4) |
| O1—C1—C2—C3  | 63.6 (6)  | C7—C8—C9—O5   | -69.6 (7)  |
| C8—C1—C2—C3  | -56.2 (7) | C1—C8—C9—O5   | 172.6 (5)  |

|              |            |                 |             |
|--------------|------------|-----------------|-------------|
| N10—C2—C3—C4 | -179.4 (5) | Br—C8—C9—O5     | 53.0 (6)    |
| C1—C2—C3—C4  | 55.7 (7)   | C7—C8—C9—C4     | 55.8 (7)    |
| C2—C3—C4—O2  | -175.8 (6) | C1—C8—C9—C4     | -62.0 (6)   |
| C2—C3—C4—C5  | 64.1 (7)   | Br—C8—C9—C4     | 178.4 (4)   |
| C2—C3—C4—C9  | -56.8 (7)  | O2—C4—C9—O5     | -57.0 (7)   |
| O2—C4—C5—O3  | 87.9 (7)   | C5—C4—C9—O5     | 67.4 (7)    |
| C3—C4—C5—O3  | -155.6 (6) | C3—C4—C9—O5     | -173.5 (5)  |
| C9—C4—C5—O3  | -35.6 (8)  | O2—C4—C9—C8     | 176.0 (5)   |
| O2—C4—C5—C6  | 156.6 (6)  | C5—C4—C9—C8     | -59.6 (7)   |
| C3—C4—C5—C6  | -86.9 (8)  | C3—C4—C9—C8     | 59.5 (7)    |
| C9—C4—C5—C6  | 33.1 (8)   | C1—C2—N10—C11   | -124.2 (7)  |
| C4—C5—O3—C6  | 111.3 (7)  | C3—C2—N10—C11   | 110.5 (7)   |
| C5—O3—C6—C7  | -108.6 (7) | C2—N10—C11—O6   | 0.4 (11)    |
| C4—C5—C6—O3  | -105.4 (7) | C2—N10—C11—C12  | 179.9 (6)   |
| O3—C5—C6—C7  | 105.8 (6)  | O6—C11—C12—C13  | -2.4 (11)   |
| C4—C5—C6—C7  | 0.4 (9)    | N10—C11—C12—C13 | 178.1 (7)   |
| O3—C6—C7—O4  | -128.0 (6) | C11—C12—C13—C14 | 178.6 (7)   |
| C5—C6—C7—O4  | 164.9 (6)  | C14—C15—C16—C17 | 115.7 (14)  |
| O3—C6—C7—C8  | 61.2 (8)   | C14—C15—C16—C24 | -128.2 (13) |
| C5—C6—C7—C8  | -5.9 (8)   | C15—C16—C17—C18 | -69.2 (16)  |
| O4—C7—C8—C9  | 166.0 (6)  | C24—C16—C17—C18 | 174.4 (12)  |
| C6—C7—C8—C9  | -23.4 (7)  | C16—C15—C14—C13 | 178.5 (9)   |
| O4—C7—C8—C1  | -73.3 (7)  | C16—C15—C14—C23 | -0.6 (17)   |
| C6—C7—C8—C1  | 97.3 (6)   | C12—C13—C14—C15 | 177.1 (8)   |
| O4—C7—C8—Br  | 42.7 (7)   | C12—C13—C14—C23 | -3.7 (14)   |
| C6—C7—C8—Br  | -146.7 (4) | C16—C17—C18—C19 | -176.8 (13) |
| O1—C1—C8—C9  | -59.0 (6)  | C17—C18—C19—C20 | -64.6 (17)  |
| C2—C1—C8—C9  | 60.5 (6)   | C18—C19—C20—C21 | -56 (2)     |
| O1—C1—C8—C7  | 177.2 (5)  | C19—C20—C21—C22 | -171.3 (17) |
| C2—C1—C8—C7  | -63.2 (6)  |                 |             |

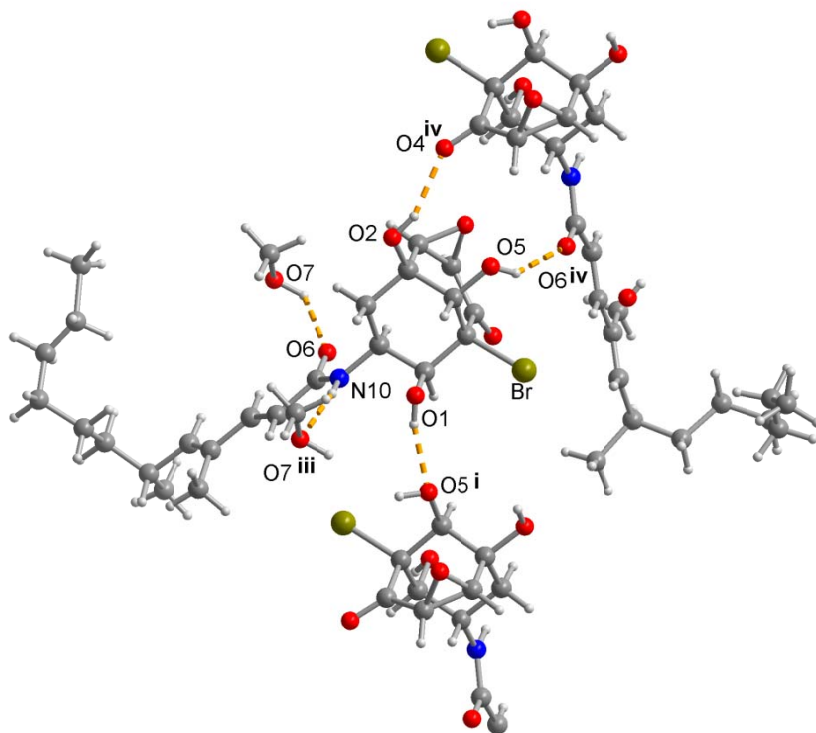

**Figure S54.** Hydrogen-bonding network in **1** indicated as dashed orange lines. See Table X for details. Symmetry codes: (i)  $-x+2, y-1/2, -z+1/2$ ; (iii)  $x+1, y, z$ ; (iv)  $-x+1, y+1/2, -z+1/2$ .

**Table S5.** Hydrogen-bond geometry (Å, °) for **1**.<sup>a</sup>

| D—H···A                     | D—H (Å) | H···A (Å) | D···A (Å) | D—H···A (°) |
|-----------------------------|---------|-----------|-----------|-------------|
| O1—H1···O5 <sup>i</sup>     | 0.84(5) | 1.91(6)   | 2.717(6)  | 160(8)      |
| C1—H1A···O3 <sup>ii</sup>   | 1.00    | 2.42      | 3.225(7)  | 137         |
| N10—H10···O7 <sup>iii</sup> | 0.93(6) | 2.00(6)   | 2.889(9)  | 158(7)      |
| O2—H2···O4 <sup>iv</sup>    | 0.84    | 2.09      | 2.859(7)  | 152         |
| O5—H5···O6 <sup>iv</sup>    | 0.84    | 2.05      | 2.779(7)  | 144         |
| C6—H6A···Br <sup>v</sup>    | 1.00    | 3.00      | 3.767(7)  | 134         |
| C6—H6A···O1 <sup>v</sup>    | 1.00    | 2.36      | 3.276(7)  | 151         |
| O7—H7···O6                  | 0.91(6) | 2.14(12)  | 2.784(8)  | 128(12)     |

<sup>a</sup> Standard deviations for refined atom contacts are given in parentheses. Symmetry codes: (i)  $-x+2, y-1/2, -z+1/2$ ; (ii)  $-x+1, y-1/2, -z+1/2$ ; (iii)  $x+1, y, z$ ; (iv)  $-x+1, y+1/2, -z+1/2$ ; (v)  $x-1, y, z$ .

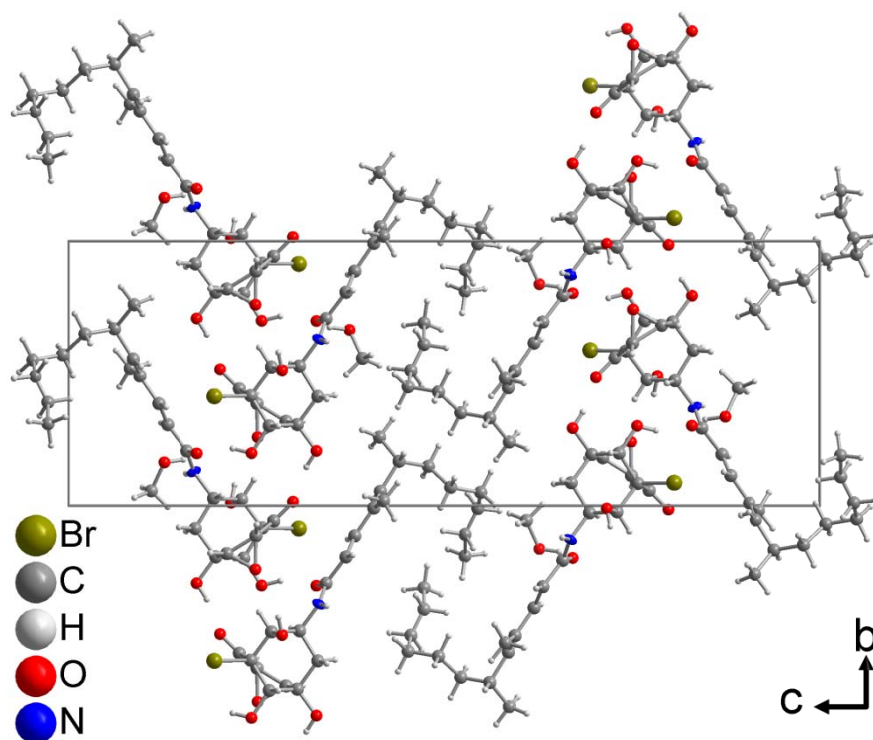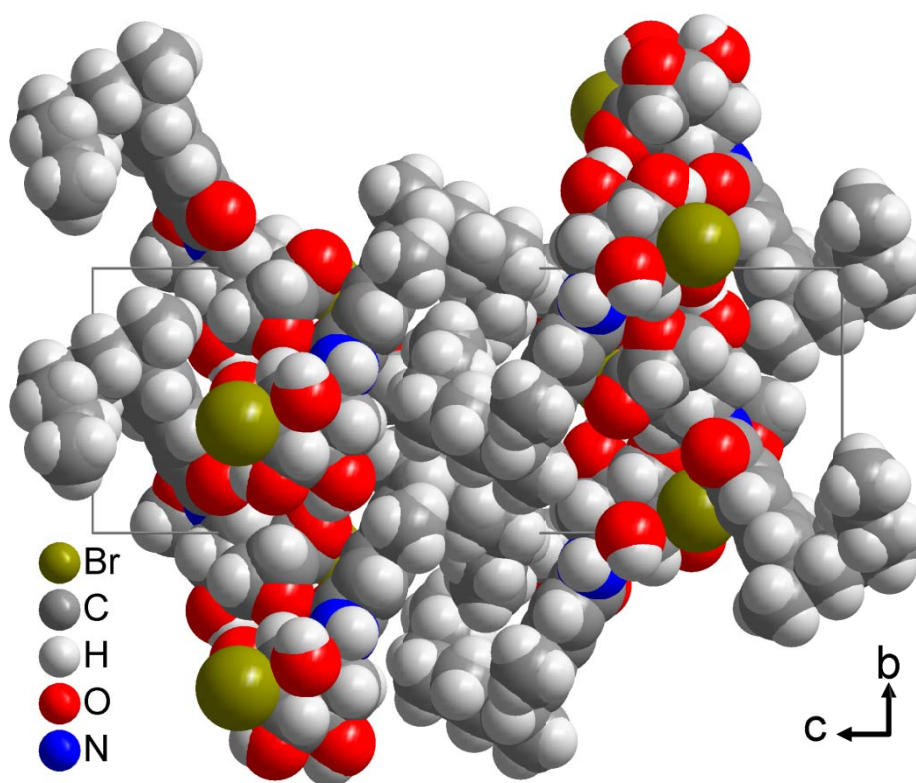

**Figure S55.** Unit cell packing diagram of **1** projected onto the *bc* plane – in ball-and-stick and in space-filling mode – showing the separation of the hydrophilic hydrogen-bonding part of the molecule (in layers parallel to the *ab* plane) and the interdigitated (interlocking) hydrophobic branched alkyl chain (sandwiched between the hydrophilic layers).

## Notes and references

1. Apex2, Data Collection Program for the CCD Area-Detector System; SAINT, Data Reduction and Frame Integration Program for the CCD Area-Detector System. Bruker Analytical X-ray Systems, Madison, Wisconsin, USA, 1997-2006.
2. G. M. Sheldrick, Program SADABS: Area-detector absorption correction, University of Göttingen, Germany, 1996.
3. G. M. Sheldrick, *Acta Crystallogr. Sect. A*, 2008, **64**, 112-122.
4. (a) J. K. Maclaren, J. Sanchiz, P. Gili and C. Janiak, *New J. Chem.*, 2012, **36**, 1596-1609; (b) J. K. Maclaren and C. Janiak, *Inorg. Chim. Acta*, 2012, **389**, 183-190; (c) T. Dorn, A. C. Chamayou and C. Janiak, *New J. Chem.*, 2006, **30**, 156-167.
5. M. Enamullah, V. Vasylyeva and C. Janiak, *Inorg. Chim. Acta*, 2013, **408**, 109-119.
6. (a) H. D. Flack, M. Sadki, A. L. Thompson and D. J. Watkin, *Acta Crystallogr. Sect. A: Fundam. Crystallogr.*, 2011, **67**, 21-34; (b) H. D. Flack and G. Bernardinelli, *Chirality*, 2008, **20**, 681-690; (c) H. D. Flack and G. Bernardinelli, *Acta Crystallogr. Sect. A: Fundam. Crystallogr.*, 1999, **55**, 908-915; (d) H. D. Flack, *Acta Crystallogr. Sect. A: Fundam. Crystallogr.*, 1983, **39**, 876-881.
